# Supplementary material for: An X-ray and Neutron Scattering Study of Aqueous MgCl2 Solution in the Gigapascal Pressure Range
Source: MDPI journal article supplement (doi:10.3390/liquids3030019), 2023-07-04
Supplement: s1 [file s1]

# An X-ray and neutron scattering study of aqueous $\text{MgCl}_2$ solution in the gigapascal pressure range

Toshio Yamaguchi <sup>1,2,\*</sup>, Nami Fukuyama <sup>2,†</sup>, Koji Yoshida <sup>2</sup>, Yoshinori Katayama <sup>3</sup>, Shinichi Machida <sup>4</sup> and Takanori Hattori <sup>5</sup>

<sup>1</sup> Key Laboratory of Salt Lake Resources Chemistry of Qinghai Province; Qinghai Institute of Salt Lakes, Chinese Academy of Sciences, Xining, Qinghai 810008, China

<sup>2</sup> Department of Chemistry, Faculty of Science, Fukuoka University, Jonan, Fukuoka 814-0180, Japan; yamaguch@fukuoka-u.ac.jp

<sup>3</sup> Synchrotron Radiation Research Center, National Institutes for Quantum and Radiological Science and Technology, Sayo, Hyogo 679-5148, Japan; katayama.yoshinori@qst.go.jp

<sup>4</sup> Neutron Science and Technology Center, Comprehensive Research Organization for Science and Society (CROSS), 162-1 Shirakata, Tokai 319-1106, Japan; s\_machida@cross.or.jp

<sup>5</sup> J-PARC Center, Japan Atomic Energy Agency, 2-4 Shirakata, Tokai 319-1195, Japan; takanori@post.j-parc.jp

† Present address: Research Institute, Maeda Road, 208 Oohata, Tshuchiura, Ibaraki, 300-43111, Japan; nami.fukuuama@maedaroad.co.jp

\* Correspondence: yamaguch@fukuoka-u.ac.jp

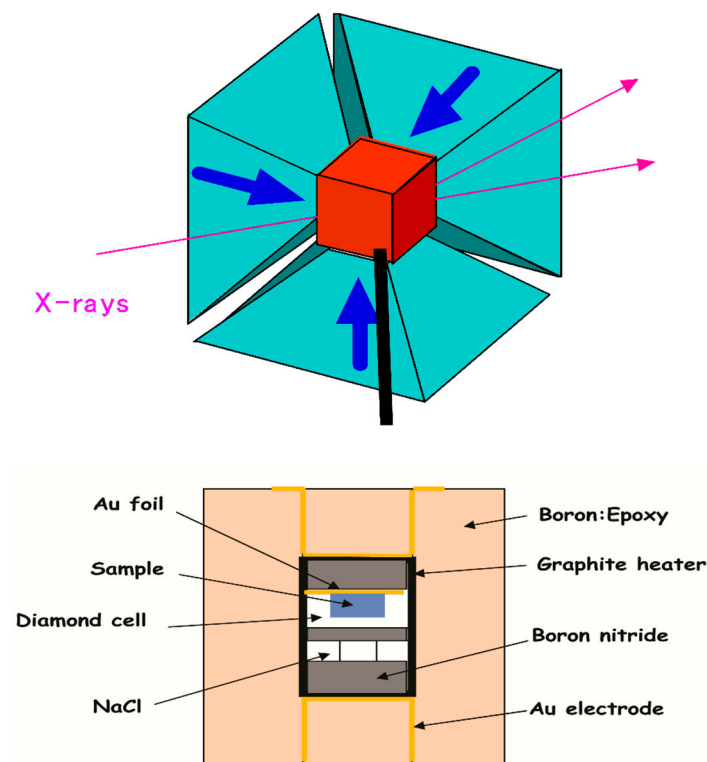

Figure S1. The cross-section of a high-pressure cell assembly for X-ray scattering.

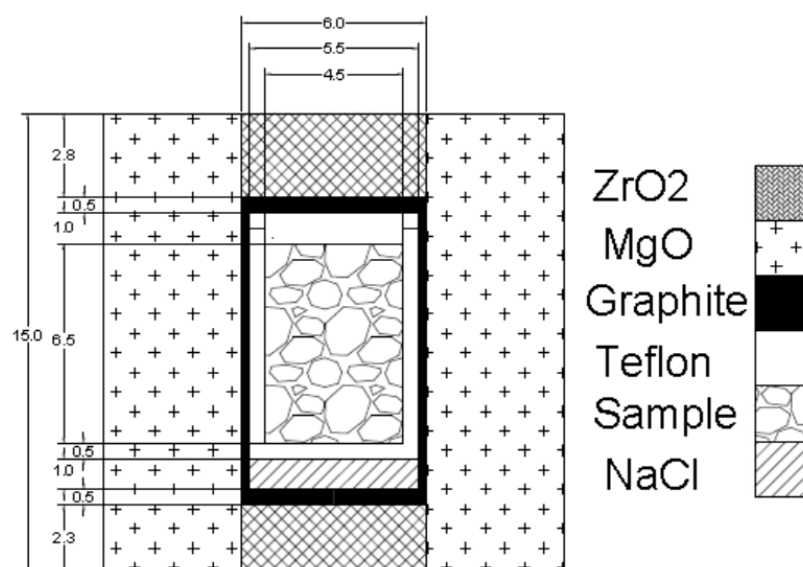

**Figure S2.** The cross-section of a high-pressure cell assembly for neutron scattering (dimension in mm).

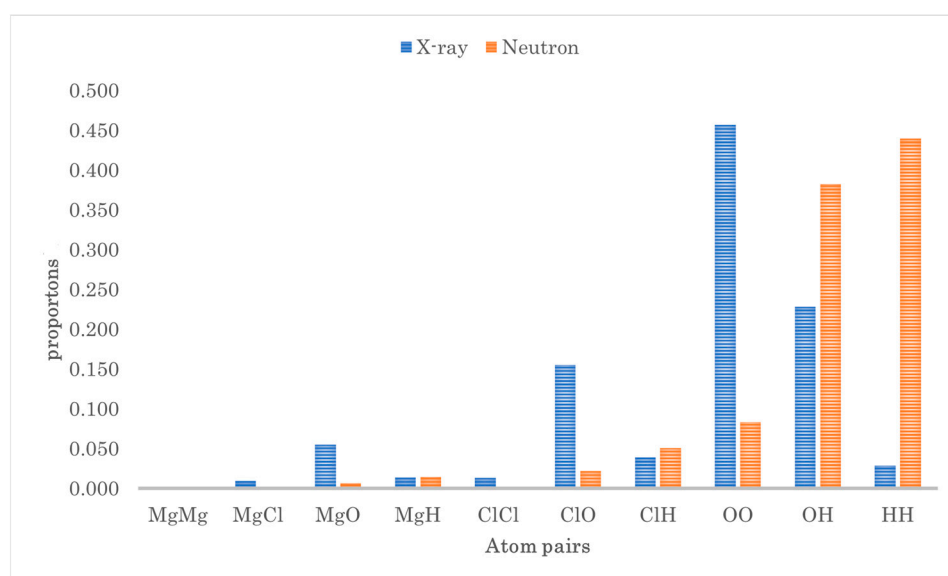

**Figure S3.** Comparison of the contributions of the atom pairs for a 2 m MgCl<sub>2</sub> aqueous solution seen by X-ray and neutron scattering. Please note that neutron scattering employs D atom instead of H.

**Table S1.** Tabulated data of pair distribution functions  $g(r)$  of Mg-Ow, Mg-Hw, Cl-Ow, and Cl-Hw in different thermodynamic states. The  $g(r)$  values of Mg-Ow and Cl-Ow are given at 2 GPa/500 K for X-ray scattering.

2 m MgCl<sub>2</sub>-Water  $g(r)$  at 0.1 MPa 300 K; distance  $r$ ,  $g(r)$  and errors

| $r/\text{\AA}$ | Mg-Ow    | Mg-Hw    | Cl-Ow    | Cl-Hw    |
|----------------|----------|----------|----------|----------|
| 0.00E+00       | 0.00E+00 | 0.00E+00 | 0.00E+00 | 0.00E+00 |
| 7.50E-03       | 0.00E+00 | 0.00E+00 | 0.00E+00 | 0.00E+00 |
| 3.00E-02       | 0.00E+00 | 0.00E+00 | 0.00E+00 | 0.00E+00 |
| 6.00E-02       | 0.00E+00 | 0.00E+00 | 0.00E+00 | 0.00E+00 |
| 9.00E-02       | 0.00E+00 | 0.00E+00 | 0.00E+00 | 0.00E+00 |
| 1.20E-01       | 0.00E+00 | 0.00E+00 | 0.00E+00 | 0.00E+00 |

[illegible]

1.41E+00 0.00E+00 0.00E+00 0.00E+00 0.00E+00 0.00E+00 0.00E+00 0.00E+00 0.00E+00  
1.44E+00 0.00E+00 0.00E+00 0.00E+00 0.00E+00 0.00E+00 0.00E+00 0.00E+00 0.00E+00  
1.47E+00 0.00E+00 0.00E+00 0.00E+00 0.00E+00 0.00E+00 0.00E+00 0.00E+00 0.00E+00  
1.50E+00 0.00E+00 0.00E+00 0.00E+00 0.00E+00 0.00E+00 0.00E+00 1.48E-06 4.34E-04  
1.53E+00 0.00E+00 0.00E+00 0.00E+00 0.00E+00 0.00E+00 0.00E+00 1.71E-05 2.04E-03  
1.56E+00 0.00E+00 0.00E+00 0.00E+00 0.00E+00 0.00E+00 0.00E+00 3.44E-05 2.82E-03  
1.59E+00 0.00E+00 0.00E+00 0.00E+00 0.00E+00 0.00E+00 0.00E+00 9.12E-05 4.45E-03  
1.62E+00 0.00E+00 0.00E+00 5.07E-06 1.48E-03 0.00E+00 0.00E+00 2.87E-04 7.78E-03  
1.65E+00 9.89E-06 2.89E-03 0.00E+00 0.00E+00 0.00E+00 0.00E+00 7.53E-04 1.24E-02  
1.68E+00 2.18E-04 1.31E-02 1.89E-05 2.59E-03 0.00E+00 0.00E+00 1.81E-03 1.89E-02  
1.71E+00 2.06E-03 4.04E-02 1.15E-05 2.01E-03 0.00E+00 0.00E+00 4.40E-03 2.89E-02  
1.74E+00 2.93E-02 1.51E-01 4.40E-05 3.97E-03 0.00E+00 0.00E+00 9.55E-03 4.18E-02  
1.77E+00 3.18E-01 4.93E-01 1.02E-04 6.04E-03 0.00E+00 0.00E+00 1.84E-02 5.72E-02  
1.80E+00 1.98E+00 1.26E+00 1.44E-04 7.08E-03 0.00E+00 0.00E+00 3.49E-02 7.75E-02  
1.83E+00 6.85E+00 2.35E+00 2.53E-04 9.16E-03 0.00E+00 0.00E+00 6.23E-02 1.01E-01  
1.86E+00 1.47E+01 3.27E+00 3.28E-04 1.02E-02 0.00E+00 0.00E+00 1.07E-01 1.30E-01  
1.89E+00 2.15E+01 3.62E+00 5.25E-04 1.27E-02 0.00E+00 0.00E+00 1.72E-01 1.63E-01  
1.92E+00 2.35E+01 3.59E+00 9.91E-04 1.74E-02 0.00E+00 0.00E+00 2.66E-01 2.00E-01  
1.95E+00 2.08E+01 3.34E+00 1.74E-03 2.26E-02 0.00E+00 0.00E+00 3.90E-01 2.37E-01  
1.98E+00 1.58E+01 2.92E+00 2.96E-03 2.92E-02 0.00E+00 0.00E+00 5.48E-01 2.77E-01  
2.01E+00 1.07E+01 2.43E+00 5.95E-03 4.11E-02 0.00E+00 0.00E+00 7.44E-01 3.18E-01  
2.04E+00 6.79E+00 1.94E+00 1.16E-02 5.61E-02 0.00E+00 0.00E+00 9.57E-01 3.52E-01  
2.07E+00 4.13E+00 1.50E+00 2.09E-02 7.46E-02 0.00E+00 0.00E+00 1.19E+00 3.88E-01  
2.10E+00 2.48E+00 1.15E+00 3.83E-02 1.00E-01 0.00E+00 0.00E+00 1.43E+00 4.16E-01  
2.13E+00 1.49E+00 8.73E-01 6.73E-02 1.31E-01 0.00E+00 0.00E+00 1.66E+00 4.41E-01  
2.16E+00 9.12E-01 6.75E-01 1.16E-01 1.71E-01 0.00E+00 0.00E+00 1.87E+00 4.61E-01  
2.19E+00 5.67E-01 5.22E-01 1.94E-01 2.20E-01 0.00E+00 0.00E+00 2.05E+00 4.77E-01  
2.22E+00 3.65E-01 4.11E-01 3.16E-01 2.79E-01 0.00E+00 0.00E+00 2.18E+00 4.87E-01  
2.25E+00 2.43E-01 3.29E-01 5.01E-01 3.49E-01 0.00E+00 0.00E+00 2.26E+00 4.89E-01  
2.28E+00 1.68E-01 2.70E-01 7.64E-01 4.29E-01 0.00E+00 0.00E+00 2.30E+00 4.87E-01  
2.31E+00 1.18E-01 2.23E-01 1.12E+00 5.15E-01 0.00E+00 0.00E+00 2.30E+00 4.81E-01  
2.34E+00 8.71E-02 1.89E-01 1.59E+00 6.08E-01 0.00E+00 0.00E+00 2.25E+00 4.72E-01  
2.37E+00 6.44E-02 1.59E-01 2.18E+00 6.97E-01 0.00E+00 0.00E+00 2.17E+00 4.59E-01  
2.40E+00 5.12E-02 1.41E-01 2.86E+00 7.86E-01 0.00E+00 0.00E+00 2.07E+00 4.41E-01  
2.43E+00 4.05E-02 1.25E-01 3.60E+00 8.55E-01 0.00E+00 0.00E+00 1.96E+00 4.24E-01  
2.46E+00 3.23E-02 1.10E-01 4.35E+00 9.14E-01 0.00E+00 0.00E+00 1.83E+00 4.06E-01  
2.49E+00 2.69E-02 9.90E-02 5.06E+00 9.52E-01 0.00E+00 0.00E+00 1.71E+00 3.88E-01  
2.52E+00 2.34E-02 9.16E-02 5.63E+00 9.84E-01 0.00E+00 0.00E+00 1.58E+00 3.68E-01  
2.55E+00 2.11E-02 8.56E-02 6.01E+00 9.92E-01 0.00E+00 0.00E+00 1.46E+00 3.51E-01  
2.58E+00 1.89E-02 7.98E-02 6.18E+00 9.85E-01 0.00E+00 0.00E+00 1.35E+00 3.34E-01  
2.61E+00 1.72E-02 7.56E-02 6.08E+00 9.77E-01 0.00E+00 0.00E+00 1.24E+00 3.17E-01  
2.64E+00 1.58E-02 7.21E-02 5.74E+00 9.44E-01 1.91E-06 5.59E-04 1.15E+00 3.01E-01

2.67E+00 1.52E-02 6.96E-02 5.22E+00 8.99E-01 9.44E-07 2.76E-04 1.06E+00 2.86E-01  
2.70E+00 1.49E-02 6.86E-02 4.53E+00 8.31E-01 1.84E-06 5.38E-04 9.87E-01 2.72E-01  
2.73E+00 1.41E-02 6.58E-02 3.77E+00 7.59E-01 4.48E-06 7.85E-04 9.21E-01 2.61E-01  
2.76E+00 1.36E-02 6.40E-02 3.00E+00 6.68E-01 1.26E-04 4.28E-03 8.60E-01 2.48E-01  
2.79E+00 1.30E-02 6.21E-02 2.27E+00 5.79E-01 8.11E-04 1.08E-02 8.12E-01 2.41E-01  
2.82E+00 1.32E-02 6.17E-02 1.65E+00 4.88E-01 4.15E-03 2.42E-02 7.69E-01 2.30E-01  
2.85E+00 1.33E-02 6.11E-02 1.14E+00 4.04E-01 1.78E-02 4.95E-02 7.37E-01 2.25E-01  
2.88E+00 1.41E-02 6.23E-02 7.57E-01 3.24E-01 5.77E-02 8.86E-02 7.08E-01 2.17E-01  
2.91E+00 1.44E-02 6.24E-02 4.84E-01 2.56E-01 1.55E-01 1.44E-01 6.91E-01 2.13E-01  
2.94E+00 1.56E-02 6.44E-02 3.01E-01 1.99E-01 3.43E-01 2.13E-01 6.76E-01 2.09E-01  
2.97E+00 1.71E-02 6.66E-02 1.86E-01 1.55E-01 6.50E-01 2.89E-01 6.71E-01 2.06E-01  
3.00E+00 1.93E-02 7.07E-02 1.19E-01 1.23E-01 1.08E+00 3.69E-01 6.69E-01 2.04E-01  
3.03E+00 2.22E-02 7.47E-02 8.25E-02 1.02E-01 1.60E+00 4.41E-01 6.75E-01 2.02E-01  
3.06E+00 2.67E-02 8.13E-02 6.43E-02 8.87E-02 2.14E+00 5.02E-01 6.84E-01 2.02E-01  
3.09E+00 3.33E-02 9.03E-02 5.54E-02 8.18E-02 2.64E+00 5.48E-01 7.00E-01 2.03E-01  
3.12E+00 4.36E-02 1.03E-01 5.31E-02 7.95E-02 3.04E+00 5.81E-01 7.21E-01 2.03E-01  
3.15E+00 5.61E-02 1.16E-01 5.46E-02 8.01E-02 3.31E+00 5.98E-01 7.45E-01 2.05E-01  
3.18E+00 7.73E-02 1.36E-01 5.74E-02 8.10E-02 3.44E+00 6.01E-01 7.75E-01 2.06E-01  
3.21E+00 1.03E-01 1.58E-01 6.21E-02 8.31E-02 3.44E+00 5.93E-01 8.02E-01 2.07E-01  
3.24E+00 1.37E-01 1.81E-01 6.77E-02 8.64E-02 3.33E+00 5.79E-01 8.36E-01 2.09E-01  
3.27E+00 1.81E-01 2.07E-01 7.47E-02 8.96E-02 3.16E+00 5.60E-01 8.72E-01 2.10E-01  
3.30E+00 2.33E-01 2.34E-01 8.21E-02 9.37E-02 2.94E+00 5.36E-01 9.08E-01 2.13E-01  
3.33E+00 2.93E-01 2.63E-01 9.10E-02 9.80E-02 2.70E+00 5.11E-01 9.43E-01 2.15E-01  
3.36E+00 3.58E-01 2.90E-01 1.01E-01 1.02E-01 2.45E+00 4.81E-01 9.79E-01 2.18E-01  
3.39E+00 4.26E-01 3.14E-01 1.12E-01 1.06E-01 2.22E+00 4.56E-01 1.01E+00 2.18E-01  
3.42E+00 4.93E-01 3.36E-01 1.26E-01 1.12E-01 2.01E+00 4.29E-01 1.04E+00 2.20E-01  
3.45E+00 5.48E-01 3.50E-01 1.39E-01 1.17E-01 1.81E+00 4.05E-01 1.07E+00 2.20E-01  
3.48E+00 6.04E-01 3.62E-01 1.55E-01 1.23E-01 1.64E+00 3.83E-01 1.09E+00 2.20E-01  
3.51E+00 6.46E-01 3.68E-01 1.71E-01 1.28E-01 1.49E+00 3.61E-01 1.11E+00 2.20E-01  
3.54E+00 6.88E-01 3.74E-01 1.91E-01 1.34E-01 1.36E+00 3.44E-01 1.12E+00 2.20E-01  
3.57E+00 7.27E-01 3.75E-01 2.10E-01 1.39E-01 1.25E+00 3.27E-01 1.13E+00 2.18E-01  
3.60E+00 7.58E-01 3.77E-01 2.32E-01 1.46E-01 1.15E+00 3.10E-01 1.13E+00 2.17E-01  
3.63E+00 7.94E-01 3.78E-01 2.56E-01 1.52E-01 1.07E+00 2.98E-01 1.13E+00 2.15E-01  
3.66E+00 8.31E-01 3.78E-01 2.80E-01 1.58E-01 1.01E+00 2.86E-01 1.12E+00 2.13E-01  
3.69E+00 8.62E-01 3.79E-01 3.06E-01 1.65E-01 9.50E-01 2.77E-01 1.11E+00 2.10E-01  
3.72E+00 8.94E-01 3.81E-01 3.34E-01 1.71E-01 9.02E-01 2.67E-01 1.09E+00 2.07E-01  
3.75E+00 9.14E-01 3.81E-01 3.62E-01 1.77E-01 8.64E-01 2.59E-01 1.07E+00 2.04E-01  
3.78E+00 9.32E-01 3.80E-01 3.92E-01 1.82E-01 8.35E-01 2.52E-01 1.05E+00 2.00E-01  
3.81E+00 9.34E-01 3.75E-01 4.23E-01 1.88E-01 8.11E-01 2.47E-01 1.03E+00 1.97E-01  
3.84E+00 9.33E-01 3.74E-01 4.53E-01 1.93E-01 7.90E-01 2.42E-01 1.01E+00 1.93E-01  
3.87E+00 9.19E-01 3.67E-01 4.84E-01 1.96E-01 7.76E-01 2.38E-01 9.82E-01 1.89E-01  
3.90E+00 9.08E-01 3.65E-01 5.16E-01 2.00E-01 7.64E-01 2.35E-01 9.58E-01 1.85E-01

3.93E+00 8.90E-01 3.60E-01 5.48E-01 2.04E-01 7.54E-01 2.32E-01 9.35E-01 1.82E-01  
3.96E+00 8.73E-01 3.55E-01 5.80E-01 2.07E-01 7.49E-01 2.29E-01 9.13E-01 1.80E-01  
3.99E+00 8.59E-01 3.52E-01 6.12E-01 2.11E-01 7.48E-01 2.27E-01 8.91E-01 1.76E-01  
4.02E+00 8.47E-01 3.47E-01 6.43E-01 2.14E-01 7.46E-01 2.25E-01 8.72E-01 1.74E-01  
4.05E+00 8.39E-01 3.44E-01 6.77E-01 2.16E-01 7.45E-01 2.24E-01 8.53E-01 1.70E-01  
4.08E+00 8.37E-01 3.42E-01 7.06E-01 2.21E-01 7.47E-01 2.22E-01 8.36E-01 1.67E-01  
4.11E+00 8.33E-01 3.38E-01 7.37E-01 2.21E-01 7.50E-01 2.20E-01 8.19E-01 1.65E-01  
4.14E+00 8.34E-01 3.40E-01 7.68E-01 2.23E-01 7.54E-01 2.19E-01 8.07E-01 1.62E-01  
4.17E+00 8.36E-01 3.35E-01 7.97E-01 2.26E-01 7.58E-01 2.18E-01 7.96E-01 1.60E-01  
4.20E+00 8.39E-01 3.34E-01 8.25E-01 2.28E-01 7.63E-01 2.17E-01 7.87E-01 1.58E-01  
4.23E+00 8.41E-01 3.31E-01 8.48E-01 2.30E-01 7.72E-01 2.18E-01 7.80E-01 1.56E-01  
4.26E+00 8.40E-01 3.28E-01 8.70E-01 2.30E-01 7.85E-01 2.18E-01 7.75E-01 1.54E-01  
4.29E+00 8.39E-01 3.25E-01 8.93E-01 2.32E-01 7.90E-01 2.17E-01 7.72E-01 1.53E-01  
4.32E+00 8.35E-01 3.22E-01 9.12E-01 2.33E-01 8.01E-01 2.17E-01 7.73E-01 1.52E-01  
4.35E+00 8.26E-01 3.18E-01 9.26E-01 2.33E-01 8.10E-01 2.17E-01 7.75E-01 1.51E-01  
4.38E+00 8.15E-01 3.12E-01 9.38E-01 2.35E-01 8.20E-01 2.17E-01 7.78E-01 1.50E-01  
4.41E+00 8.09E-01 3.09E-01 9.48E-01 2.34E-01 8.28E-01 2.17E-01 7.83E-01 1.50E-01  
4.44E+00 7.99E-01 3.04E-01 9.53E-01 2.34E-01 8.36E-01 2.17E-01 7.90E-01 1.50E-01  
4.47E+00 7.92E-01 3.00E-01 9.58E-01 2.34E-01 8.44E-01 2.16E-01 7.97E-01 1.49E-01  
4.50E+00 7.80E-01 2.95E-01 9.61E-01 2.33E-01 8.52E-01 2.15E-01 8.05E-01 1.48E-01  
4.53E+00 7.76E-01 2.93E-01 9.61E-01 2.34E-01 8.56E-01 2.14E-01 8.15E-01 1.49E-01  
4.56E+00 7.69E-01 2.87E-01 9.61E-01 2.33E-01 8.65E-01 2.14E-01 8.27E-01 1.49E-01  
4.59E+00 7.62E-01 2.86E-01 9.59E-01 2.32E-01 8.73E-01 2.14E-01 8.37E-01 1.48E-01  
4.62E+00 7.55E-01 2.83E-01 9.60E-01 2.31E-01 8.80E-01 2.13E-01 8.48E-01 1.49E-01  
4.65E+00 7.50E-01 2.79E-01 9.58E-01 2.30E-01 8.88E-01 2.13E-01 8.60E-01 1.49E-01  
4.68E+00 7.45E-01 2.75E-01 9.55E-01 2.28E-01 8.94E-01 2.12E-01 8.72E-01 1.48E-01  
4.71E+00 7.39E-01 2.73E-01 9.56E-01 2.26E-01 9.05E-01 2.13E-01 8.85E-01 1.48E-01  
4.74E+00 7.31E-01 2.70E-01 9.54E-01 2.23E-01 9.14E-01 2.12E-01 8.98E-01 1.48E-01  
4.77E+00 7.25E-01 2.67E-01 9.56E-01 2.23E-01 9.23E-01 2.12E-01 9.11E-01 1.48E-01  
4.80E+00 7.19E-01 2.64E-01 9.58E-01 2.22E-01 9.33E-01 2.11E-01 9.24E-01 1.49E-01  
4.83E+00 7.14E-01 2.61E-01 9.61E-01 2.19E-01 9.43E-01 2.11E-01 9.37E-01 1.49E-01  
4.86E+00 7.09E-01 2.60E-01 9.63E-01 2.18E-01 9.51E-01 2.11E-01 9.49E-01 1.48E-01  
4.89E+00 7.07E-01 2.57E-01 9.68E-01 2.16E-01 9.61E-01 2.10E-01 9.60E-01 1.48E-01  
4.92E+00 7.05E-01 2.56E-01 9.74E-01 2.14E-01 9.70E-01 2.09E-01 9.72E-01 1.49E-01  
4.95E+00 7.07E-01 2.53E-01 9.80E-01 2.14E-01 9.81E-01 2.09E-01 9.82E-01 1.48E-01  
4.98E+00 7.08E-01 2.52E-01 9.87E-01 2.12E-01 9.91E-01 2.09E-01 9.92E-01 1.49E-01  
5.01E+00 7.16E-01 2.52E-01 9.96E-01 2.10E-01 1.00E+00 2.10E-01 1.00E+00 1.47E-01  
5.04E+00 7.21E-01 2.51E-01 1.00E+00 2.10E-01 1.01E+00 2.08E-01 1.01E+00 1.48E-01  
5.07E+00 7.31E-01 2.49E-01 1.01E+00 2.10E-01 1.02E+00 2.08E-01 1.02E+00 1.47E-01  
5.10E+00 7.41E-01 2.51E-01 1.03E+00 2.09E-01 1.03E+00 2.08E-01 1.03E+00 1.47E-01  
5.13E+00 7.51E-01 2.51E-01 1.04E+00 2.09E-01 1.04E+00 2.07E-01 1.03E+00 1.46E-01  
5.16E+00 7.65E-01 2.51E-01 1.05E+00 2.08E-01 1.05E+00 2.07E-01 1.04E+00 1.45E-01

5.19E+00 7.79E-01 2.52E-01 1.06E+00 2.07E-01 1.06E+00 2.07E-01 1.04E+00 1.47E-01  
5.22E+00 7.94E-01 2.54E-01 1.07E+00 2.07E-01 1.06E+00 2.06E-01 1.05E+00 1.45E-01  
5.25E+00 8.08E-01 2.53E-01 1.08E+00 2.06E-01 1.07E+00 2.07E-01 1.05E+00 1.45E-01  
5.28E+00 8.27E-01 2.57E-01 1.09E+00 2.07E-01 1.08E+00 2.06E-01 1.05E+00 1.44E-01  
5.31E+00 8.39E-01 2.57E-01 1.11E+00 2.08E-01 1.09E+00 2.06E-01 1.06E+00 1.45E-01  
5.34E+00 8.54E-01 2.57E-01 1.12E+00 2.07E-01 1.10E+00 2.06E-01 1.06E+00 1.43E-01  
5.37E+00 8.69E-01 2.57E-01 1.13E+00 2.07E-01 1.11E+00 2.05E-01 1.06E+00 1.42E-01  
5.40E+00 8.85E-01 2.58E-01 1.14E+00 2.08E-01 1.12E+00 2.06E-01 1.06E+00 1.42E-01  
5.43E+00 8.98E-01 2.59E-01 1.15E+00 2.07E-01 1.13E+00 2.04E-01 1.06E+00 1.41E-01  
5.46E+00 9.12E-01 2.60E-01 1.16E+00 2.07E-01 1.14E+00 2.05E-01 1.06E+00 1.41E-01  
5.49E+00 9.24E-01 2.60E-01 1.16E+00 2.07E-01 1.16E+00 2.06E-01 1.06E+00 1.40E-01  
5.52E+00 9.38E-01 2.61E-01 1.17E+00 2.07E-01 1.17E+00 2.05E-01 1.06E+00 1.38E-01  
5.55E+00 9.51E-01 2.62E-01 1.17E+00 2.06E-01 1.19E+00 2.06E-01 1.06E+00 1.38E-01  
5.58E+00 9.59E-01 2.61E-01 1.17E+00 2.05E-01 1.21E+00 2.08E-01 1.06E+00 1.37E-01  
5.61E+00 9.72E-01 2.61E-01 1.17E+00 2.04E-01 1.23E+00 2.08E-01 1.06E+00 1.36E-01  
5.64E+00 9.82E-01 2.61E-01 1.17E+00 2.03E-01 1.25E+00 2.09E-01 1.06E+00 1.35E-01  
5.67E+00 9.92E-01 2.61E-01 1.16E+00 2.02E-01 1.27E+00 2.08E-01 1.06E+00 1.34E-01  
5.70E+00 1.00E+00 2.60E-01 1.16E+00 2.00E-01 1.29E+00 2.09E-01 1.06E+00 1.35E-01  
5.73E+00 1.01E+00 2.60E-01 1.15E+00 1.98E-01 1.29E+00 2.08E-01 1.06E+00 1.33E-01  
5.76E+00 1.02E+00 2.59E-01 1.14E+00 1.97E-01 1.29E+00 2.06E-01 1.06E+00 1.32E-01  
5.79E+00 1.03E+00 2.60E-01 1.13E+00 1.96E-01 1.29E+00 2.06E-01 1.05E+00 1.31E-01  
5.82E+00 1.04E+00 2.59E-01 1.12E+00 1.92E-01 1.28E+00 2.04E-01 1.05E+00 1.30E-01  
5.85E+00 1.05E+00 2.59E-01 1.11E+00 1.90E-01 1.27E+00 2.01E-01 1.05E+00 1.29E-01  
5.88E+00 1.05E+00 2.59E-01 1.09E+00 1.88E-01 1.25E+00 1.99E-01 1.05E+00 1.29E-01  
5.91E+00 1.06E+00 2.58E-01 1.08E+00 1.86E-01 1.23E+00 1.95E-01 1.05E+00 1.28E-01  
5.94E+00 1.07E+00 2.57E-01 1.07E+00 1.83E-01 1.21E+00 1.93E-01 1.05E+00 1.27E-01  
5.97E+00 1.08E+00 2.57E-01 1.05E+00 1.81E-01 1.18E+00 1.89E-01 1.05E+00 1.26E-01  
6.00E+00 1.08E+00 2.55E-01 1.04E+00 1.78E-01 1.16E+00 1.88E-01 1.05E+00 1.26E-01  
6.03E+00 1.08E+00 2.55E-01 1.03E+00 1.76E-01 1.13E+00 1.85E-01 1.05E+00 1.26E-01  
6.06E+00 1.09E+00 2.55E-01 1.01E+00 1.75E-01 1.11E+00 1.81E-01 1.05E+00 1.24E-01  
6.09E+00 1.09E+00 2.55E-01 1.00E+00 1.72E-01 1.09E+00 1.79E-01 1.05E+00 1.24E-01  
6.12E+00 1.09E+00 2.53E-01 9.88E-01 1.71E-01 1.07E+00 1.77E-01 1.05E+00 1.24E-01  
6.15E+00 1.10E+00 2.52E-01 9.76E-01 1.70E-01 1.05E+00 1.74E-01 1.05E+00 1.23E-01  
6.18E+00 1.09E+00 2.51E-01 9.66E-01 1.67E-01 1.03E+00 1.72E-01 1.05E+00 1.22E-01  
6.21E+00 1.09E+00 2.50E-01 9.56E-01 1.65E-01 1.01E+00 1.69E-01 1.05E+00 1.22E-01  
6.24E+00 1.09E+00 2.48E-01 9.48E-01 1.64E-01 9.94E-01 1.67E-01 1.04E+00 1.21E-01  
6.27E+00 1.09E+00 2.47E-01 9.40E-01 1.63E-01 9.79E-01 1.65E-01 1.05E+00 1.21E-01  
6.30E+00 1.09E+00 2.45E-01 9.32E-01 1.60E-01 9.66E-01 1.63E-01 1.04E+00 1.20E-01  
6.33E+00 1.08E+00 2.43E-01 9.27E-01 1.59E-01 9.54E-01 1.62E-01 1.04E+00 1.19E-01  
6.36E+00 1.07E+00 2.40E-01 9.21E-01 1.58E-01 9.44E-01 1.61E-01 1.04E+00 1.19E-01  
6.39E+00 1.07E+00 2.39E-01 9.16E-01 1.58E-01 9.35E-01 1.59E-01 1.04E+00 1.18E-01  
6.42E+00 1.06E+00 2.37E-01 9.12E-01 1.57E-01 9.27E-01 1.57E-01 1.04E+00 1.18E-01

6.45E+00 1.05E+00 2.35E-01 9.08E-01 1.55E-01 9.20E-01 1.56E-01 1.04E+00 1.17E-01  
6.48E+00 1.04E+00 2.31E-01 9.05E-01 1.54E-01 9.14E-01 1.54E-01 1.04E+00 1.16E-01  
6.51E+00 1.03E+00 2.30E-01 9.02E-01 1.53E-01 9.09E-01 1.55E-01 1.03E+00 1.16E-01  
6.54E+00 1.02E+00 2.27E-01 8.99E-01 1.52E-01 9.03E-01 1.52E-01 1.03E+00 1.14E-01  
6.57E+00 1.01E+00 2.27E-01 8.97E-01 1.52E-01 9.01E-01 1.52E-01 1.03E+00 1.14E-01  
6.60E+00 9.96E-01 2.24E-01 8.96E-01 1.51E-01 8.97E-01 1.51E-01 1.02E+00 1.13E-01  
6.63E+00 9.84E-01 2.21E-01 8.95E-01 1.50E-01 8.95E-01 1.50E-01 1.01E+00 1.12E-01  
6.66E+00 9.73E-01 2.20E-01 8.94E-01 1.49E-01 8.92E-01 1.49E-01 1.01E+00 1.12E-01  
6.69E+00 9.61E-01 2.17E-01 8.95E-01 1.48E-01 8.91E-01 1.48E-01 1.00E+00 1.10E-01  
6.72E+00 9.52E-01 2.15E-01 8.94E-01 1.48E-01 8.90E-01 1.48E-01 9.94E-01 1.10E-01  
6.75E+00 9.41E-01 2.13E-01 8.94E-01 1.48E-01 8.89E-01 1.47E-01 9.87E-01 1.09E-01  
6.78E+00 9.31E-01 2.11E-01 8.96E-01 1.47E-01 8.87E-01 1.46E-01 9.79E-01 1.07E-01  
6.81E+00 9.22E-01 2.09E-01 8.96E-01 1.46E-01 8.87E-01 1.45E-01 9.71E-01 1.07E-01  
6.84E+00 9.13E-01 2.07E-01 8.96E-01 1.46E-01 8.88E-01 1.45E-01 9.64E-01 1.07E-01  
6.87E+00 9.05E-01 2.06E-01 8.97E-01 1.45E-01 8.87E-01 1.44E-01 9.57E-01 1.05E-01  
6.90E+00 8.99E-01 2.04E-01 8.99E-01 1.45E-01 8.87E-01 1.44E-01 9.51E-01 1.05E-01  
6.93E+00 8.94E-01 2.03E-01 9.01E-01 1.44E-01 8.87E-01 1.43E-01 9.45E-01 1.04E-01  
6.96E+00 8.89E-01 2.02E-01 9.02E-01 1.43E-01 8.87E-01 1.42E-01 9.38E-01 1.03E-01  
6.99E+00 8.87E-01 2.00E-01 9.04E-01 1.43E-01 8.86E-01 1.42E-01 9.34E-01 1.03E-01  
7.02E+00 8.82E-01 2.00E-01 9.07E-01 1.42E-01 8.86E-01 1.41E-01 9.30E-01 1.02E-01  
7.05E+00 8.82E-01 1.99E-01 9.07E-01 1.41E-01 8.87E-01 1.41E-01 9.25E-01 1.01E-01  
7.08E+00 8.80E-01 1.98E-01 9.09E-01 1.41E-01 8.86E-01 1.40E-01 9.22E-01 1.00E-01  
7.11E+00 8.78E-01 1.97E-01 9.12E-01 1.41E-01 8.87E-01 1.39E-01 9.19E-01 1.00E-01  
7.14E+00 8.80E-01 1.96E-01 9.15E-01 1.40E-01 8.87E-01 1.38E-01 9.16E-01 9.99E-02  
7.17E+00 8.81E-01 1.96E-01 9.18E-01 1.41E-01 8.87E-01 1.38E-01 9.14E-01 9.92E-02  
7.20E+00 8.82E-01 1.96E-01 9.20E-01 1.40E-01 8.87E-01 1.37E-01 9.12E-01 9.88E-02  
7.23E+00 8.84E-01 1.95E-01 9.22E-01 1.40E-01 8.88E-01 1.37E-01 9.11E-01 9.81E-02  
7.26E+00 8.89E-01 1.94E-01 9.24E-01 1.39E-01 8.89E-01 1.36E-01 9.10E-01 9.78E-02  
7.29E+00 8.91E-01 1.94E-01 9.27E-01 1.38E-01 8.91E-01 1.36E-01 9.10E-01 9.74E-02  
7.32E+00 8.95E-01 1.93E-01 9.30E-01 1.38E-01 8.92E-01 1.36E-01 9.10E-01 9.68E-02  
7.35E+00 9.02E-01 1.92E-01 9.33E-01 1.38E-01 8.94E-01 1.35E-01 9.10E-01 9.65E-02  
7.38E+00 9.07E-01 1.91E-01 9.35E-01 1.37E-01 8.96E-01 1.35E-01 9.10E-01 9.61E-02  
7.41E+00 9.11E-01 1.91E-01 9.38E-01 1.37E-01 8.98E-01 1.34E-01 9.12E-01 9.58E-02  
7.44E+00 9.19E-01 1.92E-01 9.41E-01 1.36E-01 9.01E-01 1.34E-01 9.12E-01 9.51E-02  
7.47E+00 9.25E-01 1.91E-01 9.44E-01 1.37E-01 9.03E-01 1.34E-01 9.12E-01 9.44E-02  
7.50E+00 9.29E-01 1.90E-01 9.46E-01 1.35E-01 9.06E-01 1.33E-01 9.14E-01 9.44E-02  
7.53E+00 9.37E-01 1.91E-01 9.49E-01 1.36E-01 9.09E-01 1.33E-01 9.15E-01 9.43E-02  
7.56E+00 9.42E-01 1.90E-01 9.51E-01 1.35E-01 9.12E-01 1.32E-01 9.17E-01 9.41E-02  
7.59E+00 9.49E-01 1.90E-01 9.53E-01 1.35E-01 9.16E-01 1.32E-01 9.18E-01 9.40E-02  
7.62E+00 9.54E-01 1.90E-01 9.55E-01 1.35E-01 9.18E-01 1.32E-01 9.20E-01 9.35E-02  
7.65E+00 9.59E-01 1.89E-01 9.56E-01 1.34E-01 9.21E-01 1.32E-01 9.21E-01 9.29E-02  
7.68E+00 9.65E-01 1.90E-01 9.58E-01 1.32E-01 9.25E-01 1.32E-01 9.23E-01 9.24E-02



7.71E+00 9.71E-01 1.90E-01 9.60E-01 1.34E-01 9.27E-01 1.32E-01 9.25E-01 9.31E-02  
7.74E+00 9.77E-01 1.90E-01 9.65E-01 1.32E-01 9.31E-01 1.30E-01 9.27E-01 9.24E-02  
7.77E+00 9.81E-01 1.89E-01 9.66E-01 1.32E-01 9.35E-01 1.31E-01 9.30E-01 9.22E-02  
7.80E+00 9.87E-01 1.88E-01 9.68E-01 1.32E-01 9.38E-01 1.30E-01 9.31E-01 9.14E-02  
7.83E+00 9.92E-01 1.89E-01 9.71E-01 1.32E-01 9.41E-01 1.30E-01 9.34E-01 9.16E-02  
7.86E+00 9.97E-01 1.88E-01 9.72E-01 1.31E-01 9.43E-01 1.30E-01 9.36E-01 9.11E-02  
7.89E+00 1.00E+00 1.88E-01 9.73E-01 1.31E-01 9.47E-01 1.30E-01 9.39E-01 9.06E-02  
7.92E+00 1.01E+00 1.88E-01 9.76E-01 1.31E-01 9.50E-01 1.29E-01 9.42E-01 9.08E-02  
7.95E+00 1.01E+00 1.88E-01 9.77E-01 1.31E-01 9.52E-01 1.28E-01 9.44E-01 9.03E-02  
7.98E+00 1.02E+00 1.87E-01 9.79E-01 1.29E-01 9.55E-01 1.28E-01 9.47E-01 8.99E-02  
8.01E+00 1.02E+00 1.87E-01 9.80E-01 1.29E-01 9.58E-01 1.28E-01 9.50E-01 9.01E-02  
8.04E+00 1.03E+00 1.87E-01 9.80E-01 1.28E-01 9.60E-01 1.27E-01 9.53E-01 8.96E-02  
8.07E+00 1.03E+00 1.86E-01 9.81E-01 1.28E-01 9.63E-01 1.27E-01 9.56E-01 8.99E-02  
8.10E+00 1.03E+00 1.86E-01 9.83E-01 1.28E-01 9.65E-01 1.27E-01 9.59E-01 8.95E-02  
8.13E+00 1.04E+00 1.85E-01 9.83E-01 1.28E-01 9.67E-01 1.26E-01 9.61E-01 8.95E-02  
8.16E+00 1.04E+00 1.85E-01 9.84E-01 1.28E-01 9.68E-01 1.26E-01 9.64E-01 8.90E-02  
8.19E+00 1.04E+00 1.85E-01 9.86E-01 1.27E-01 9.71E-01 1.26E-01 9.67E-01 8.86E-02  
8.22E+00 1.04E+00 1.84E-01 9.87E-01 1.27E-01 9.72E-01 1.26E-01 9.70E-01 8.88E-02  
8.25E+00 1.04E+00 1.83E-01 9.88E-01 1.26E-01 9.74E-01 1.26E-01 9.73E-01 8.87E-02  
8.28E+00 1.05E+00 1.83E-01 9.90E-01 1.26E-01 9.77E-01 1.25E-01 9.75E-01 8.83E-02  
8.31E+00 1.05E+00 1.83E-01 9.92E-01 1.26E-01 9.77E-01 1.24E-01 9.78E-01 8.82E-02  
8.34E+00 1.05E+00 1.82E-01 9.92E-01 1.26E-01 9.77E-01 1.24E-01 9.81E-01 8.82E-02  
8.37E+00 1.05E+00 1.81E-01 9.96E-01 1.26E-01 9.79E-01 1.24E-01 9.83E-01 8.79E-02  
8.40E+00 1.05E+00 1.80E-01 9.97E-01 1.25E-01 9.80E-01 1.23E-01 9.87E-01 8.77E-02  
8.43E+00 1.05E+00 1.80E-01 9.97E-01 1.24E-01 9.81E-01 1.23E-01 9.88E-01 8.72E-02  
8.46E+00 1.05E+00 1.78E-01 9.99E-01 1.24E-01 9.82E-01 1.23E-01 9.91E-01 8.71E-02  
8.49E+00 1.05E+00 1.79E-01 1.00E+00 1.24E-01 9.82E-01 1.22E-01 9.93E-01 8.71E-02  
8.52E+00 1.05E+00 1.78E-01 1.00E+00 1.24E-01 9.82E-01 1.22E-01 9.96E-01 8.69E-02  
8.55E+00 1.05E+00 1.76E-01 1.00E+00 1.23E-01 9.82E-01 1.22E-01 9.98E-01 8.65E-02  
8.58E+00 1.05E+00 1.76E-01 1.01E+00 1.23E-01 9.84E-01 1.21E-01 1.00E+00 8.62E-02  
8.61E+00 1.04E+00 1.74E-01 1.01E+00 1.22E-01 9.85E-01 1.20E-01 1.00E+00 8.61E-02  
8.64E+00 1.04E+00 1.76E-01 1.01E+00 1.22E-01 9.85E-01 1.20E-01 1.00E+00 8.58E-02  
8.67E+00 1.04E+00 1.75E-01 1.01E+00 1.22E-01 9.86E-01 1.20E-01 1.01E+00 8.58E-02  
8.70E+00 1.04E+00 1.75E-01 1.01E+00 1.21E-01 9.86E-01 1.20E-01 1.01E+00 8.52E-02  
8.73E+00 1.04E+00 1.73E-01 1.01E+00 1.21E-01 9.87E-01 1.19E-01 1.01E+00 8.51E-02  
8.76E+00 1.03E+00 1.72E-01 1.01E+00 1.21E-01 9.87E-01 1.19E-01 1.01E+00 8.50E-02  
8.79E+00 1.03E+00 1.72E-01 1.02E+00 1.20E-01 9.89E-01 1.19E-01 1.01E+00 8.50E-02  
8.82E+00 1.03E+00 1.71E-01 1.02E+00 1.20E-01 9.90E-01 1.18E-01 1.01E+00 8.46E-02  
8.85E+00 1.03E+00 1.70E-01 1.02E+00 1.20E-01 9.90E-01 1.17E-01 1.01E+00 8.47E-02  
8.88E+00 1.03E+00 1.70E-01 1.02E+00 1.19E-01 9.90E-01 1.18E-01 1.02E+00 8.41E-02  
8.91E+00 1.03E+00 1.69E-01 1.02E+00 1.19E-01 9.93E-01 1.17E-01 1.02E+00 8.40E-02  
8.94E+00 1.02E+00 1.68E-01 1.02E+00 1.19E-01 9.93E-01 1.17E-01 1.02E+00 8.40E-02

8.97E+00 1.02E+00 1.66E-01 1.02E+00 1.18E-01 9.95E-01 1.17E-01 1.02E+00 8.36E-02  
 9.00E+00 1.02E+00 1.66E-01 1.02E+00 1.18E-01 9.95E-01 1.16E-01 1.02E+00 8.32E-02  
 9.03E+00 1.02E+00 1.65E-01 1.02E+00 1.17E-01 9.97E-01 1.16E-01 1.02E+00 8.31E-02  
 9.06E+00 1.02E+00 1.66E-01 1.02E+00 1.17E-01 9.98E-01 1.16E-01 1.02E+00 8.27E-02  
 9.09E+00 1.02E+00 1.64E-01 1.02E+00 1.17E-01 1.00E+00 1.15E-01 1.02E+00 8.21E-02  
 9.12E+00 1.02E+00 1.65E-01 1.02E+00 1.16E-01 1.00E+00 1.15E-01 1.02E+00 8.23E-02  
 9.15E+00 1.02E+00 1.64E-01 1.02E+00 1.16E-01 1.00E+00 1.14E-01 1.02E+00 8.17E-02  
 9.18E+00 1.01E+00 1.64E-01 1.02E+00 1.16E-01 1.00E+00 1.14E-01 1.02E+00 8.13E-02  
 9.21E+00 1.01E+00 1.63E-01 1.02E+00 1.15E-01 1.01E+00 1.14E-01 1.02E+00 8.11E-02  
 9.24E+00 1.01E+00 1.63E-01 1.02E+00 1.15E-01 1.01E+00 1.14E-01 1.02E+00 8.10E-02  
 9.27E+00 1.01E+00 1.62E-01 1.02E+00 1.15E-01 1.01E+00 1.13E-01 1.02E+00 8.08E-02  
 9.30E+00 1.01E+00 1.61E-01 1.02E+00 1.14E-01 1.01E+00 1.13E-01 1.02E+00 8.06E-02  
 9.33E+00 1.01E+00 1.60E-01 1.02E+00 1.14E-01 1.01E+00 1.13E-01 1.02E+00 7.97E-02  
 9.36E+00 1.01E+00 1.59E-01 1.01E+00 1.13E-01 1.01E+00 1.13E-01 1.02E+00 7.95E-02  
 9.39E+00 1.01E+00 1.59E-01 1.01E+00 1.13E-01 1.01E+00 1.12E-01 1.02E+00 7.94E-02  
 9.42E+00 1.01E+00 1.59E-01 1.01E+00 1.12E-01 1.01E+00 1.12E-01 1.01E+00 7.94E-02  
 9.45E+00 1.01E+00 1.57E-01 1.01E+00 1.12E-01 1.01E+00 1.11E-01 1.01E+00 7.90E-02  
 9.48E+00 1.01E+00 1.57E-01 1.01E+00 1.11E-01 1.01E+00 1.11E-01 1.01E+00 7.85E-02  
 9.51E+00 1.01E+00 1.57E-01 1.01E+00 1.11E-01 1.01E+00 1.11E-01 1.01E+00 7.82E-02  
 9.54E+00 1.01E+00 1.57E-01 1.01E+00 1.11E-01 1.01E+00 1.11E-01 1.01E+00 7.77E-02  
 9.57E+00 1.01E+00 1.56E-01 1.01E+00 1.10E-01 1.01E+00 1.10E-01 1.01E+00 7.75E-02  
 9.60E+00 1.00E+00 1.55E-01 1.01E+00 1.10E-01 1.01E+00 1.10E-01 1.01E+00 7.75E-02  
 9.63E+00 1.00E+00 1.55E-01 1.00E+00 1.10E-01 1.01E+00 1.09E-01 1.01E+00 7.68E-02  
 9.66E+00 1.00E+00 1.54E-01 1.00E+00 1.09E-01 1.01E+00 1.09E-01 1.00E+00 7.68E-02  
 9.69E+00 1.00E+00 1.54E-01 1.00E+00 1.09E-01 1.01E+00 1.09E-01 1.00E+00 7.59E-02  
 9.72E+00 1.00E+00 1.53E-01 1.00E+00 1.08E-01 1.01E+00 1.08E-01 1.00E+00 7.62E-02  
 9.75E+00 1.00E+00 1.52E-01 9.98E-01 1.08E-01 1.01E+00 1.08E-01 9.99E-01 7.61E-02  
 9.78E+00 1.00E+00 1.52E-01 9.97E-01 1.07E-01 1.01E+00 1.07E-01 9.98E-01 7.54E-02  
 9.81E+00 1.00E+00 1.51E-01 9.96E-01 1.07E-01 1.01E+00 1.07E-01 9.96E-01 7.50E-02  
 9.84E+00 9.99E-01 1.51E-01 9.93E-01 1.06E-01 1.01E+00 1.06E-01 9.94E-01 7.52E-02  
 9.87E+00 9.98E-01 1.50E-01 9.92E-01 1.06E-01 1.00E+00 1.06E-01 9.93E-01 7.52E-02  
 9.90E+00 9.97E-01 1.50E-01 9.90E-01 1.05E-01 1.00E+00 1.05E-01 9.92E-01 7.48E-02  
 9.93E+00 9.96E-01 1.50E-01 9.88E-01 1.05E-01 1.00E+00 1.05E-01 9.90E-01 7.42E-02  
 9.96E+00 9.95E-01 1.49E-01 9.86E-01 1.05E-01 1.00E+00 1.06E-01 9.89E-01 7.39E-02  
 9.99E+00 9.95E-01 1.49E-01 9.84E-01 1.05E-01 9.99E-01 1.05E-01 9.87E-01 7.37E-02  
 1.00E+01 9.93E-01 1.48E-01 9.82E-01 1.04E-01 9.98E-01 1.04E-01 9.86E-01 7.34E-02

2 m MgCl<sub>2</sub>-Water  $g(r)$  at 1 GPa 300 K; distance  $r$ ,  $g(r)$  and errors

| $r$      | Mg-Ow    | Mg-Hw    | Cl-Ow    | Cl-Hw    |
|----------|----------|----------|----------|----------|
| 0.00E+00 | 0.00E+00 | 0.00E+00 | 0.00E+00 | 0.00E+00 |
| 7.50E-03 | 0.00E+00 | 0.00E+00 | 0.00E+00 | 0.00E+00 |
| 3.00E-02 | 0.00E+00 | 0.00E+00 | 0.00E+00 | 0.00E+00 |

[illegible]

1.32E+00 0.00E+00 0.00E+00 0.00E+00 0.00E+00 0.00E+00 0.00E+00 0.00E+00 0.00E+00  
1.35E+00 0.00E+00 0.00E+00 0.00E+00 0.00E+00 0.00E+00 0.00E+00 0.00E+00 0.00E+00  
1.38E+00 0.00E+00 0.00E+00 0.00E+00 0.00E+00 0.00E+00 0.00E+00 0.00E+00 0.00E+00  
1.41E+00 0.00E+00 0.00E+00 0.00E+00 0.00E+00 0.00E+00 0.00E+00 0.00E+00 0.00E+00  
1.44E+00 0.00E+00 0.00E+00 0.00E+00 0.00E+00 0.00E+00 0.00E+00 0.00E+00 0.00E+00  
1.47E+00 0.00E+00 0.00E+00 0.00E+00 0.00E+00 0.00E+00 0.00E+00 0.00E+00 0.00E+00  
1.50E+00 0.00E+00 0.00E+00 0.00E+00 0.00E+00 0.00E+00 0.00E+00 0.00E+00 0.00E+00  
1.53E+00 0.00E+00 0.00E+00 0.00E+00 0.00E+00 0.00E+00 0.00E+00 6.68E-06 1.17E-03  
1.56E+00 0.00E+00 0.00E+00 0.00E+00 0.00E+00 0.00E+00 0.00E+00 3.38E-05 2.56E-03  
1.59E+00 0.00E+00 0.00E+00 0.00E+00 0.00E+00 0.00E+00 0.00E+00 1.21E-04 4.76E-03  
1.62E+00 0.00E+00 0.00E+00 0.00E+00 0.00E+00 0.00E+00 0.00E+00 3.79E-04 8.32E-03  
1.65E+00 1.15E-05 2.86E-03 0.00E+00 0.00E+00 0.00E+00 0.00E+00 9.72E-04 1.29E-02  
1.68E+00 2.28E-04 1.22E-02 0.00E+00 0.00E+00 0.00E+00 0.00E+00 2.67E-03 2.10E-02  
1.71E+00 1.65E-03 3.28E-02 1.08E-05 1.89E-03 0.00E+00 0.00E+00 5.83E-03 3.06E-02  
1.74E+00 2.62E-02 1.29E-01 2.33E-05 2.64E-03 0.00E+00 0.00E+00 1.25E-02 4.38E-02  
1.77E+00 3.09E-01 4.36E-01 8.76E-05 5.08E-03 0.00E+00 0.00E+00 2.51E-02 6.12E-02  
1.80E+00 1.88E+00 1.04E+00 1.40E-04 6.46E-03 0.00E+00 0.00E+00 4.74E-02 8.29E-02  
1.83E+00 6.20E+00 1.79E+00 2.48E-04 8.32E-03 0.00E+00 0.00E+00 8.63E-02 1.10E-01  
1.86E+00 1.24E+01 2.44E+00 5.52E-04 1.25E-02 0.00E+00 0.00E+00 1.45E-01 1.40E-01  
1.89E+00 1.70E+01 2.84E+00 9.15E-04 1.57E-02 0.00E+00 0.00E+00 2.33E-01 1.74E-01  
1.92E+00 1.73E+01 2.82E+00 1.81E-03 2.14E-02 0.00E+00 0.00E+00 3.55E-01 2.12E-01  
1.95E+00 1.42E+01 2.48E+00 3.57E-03 2.97E-02 0.00E+00 0.00E+00 5.13E-01 2.51E-01  
1.98E+00 1.01E+01 2.07E+00 6.07E-03 3.83E-02 0.00E+00 0.00E+00 7.11E-01 2.90E-01  
2.01E+00 6.58E+00 1.67E+00 1.15E-02 5.19E-02 0.00E+00 0.00E+00 9.32E-01 3.29E-01  
2.04E+00 4.05E+00 1.32E+00 1.94E-02 6.65E-02 0.00E+00 0.00E+00 1.17E+00 3.61E-01  
2.07E+00 2.44E+00 1.03E+00 3.43E-02 8.68E-02 0.00E+00 0.00E+00 1.41E+00 3.90E-01  
2.10E+00 1.47E+00 7.94E-01 5.76E-02 1.11E-01 0.00E+00 0.00E+00 1.64E+00 4.12E-01  
2.13E+00 9.08E-01 6.19E-01 9.53E-02 1.41E-01 0.00E+00 0.00E+00 1.83E+00 4.27E-01  
2.16E+00 5.77E-01 4.89E-01 1.54E-01 1.76E-01 0.00E+00 0.00E+00 1.97E+00 4.41E-01  
2.19E+00 3.77E-01 3.92E-01 2.41E-01 2.18E-01 0.00E+00 0.00E+00 2.07E+00 4.42E-01  
2.22E+00 2.57E-01 3.19E-01 3.64E-01 2.64E-01 0.00E+00 0.00E+00 2.11E+00 4.38E-01  
2.25E+00 1.82E-01 2.64E-01 5.28E-01 3.13E-01 0.00E+00 0.00E+00 2.10E+00 4.33E-01  
2.28E+00 1.35E-01 2.25E-01 7.49E-01 3.68E-01 0.00E+00 0.00E+00 2.04E+00 4.22E-01  
2.31E+00 1.03E-01 1.93E-01 1.03E+00 4.22E-01 0.00E+00 0.00E+00 1.96E+00 4.06E-01  
2.34E+00 7.75E-02 1.65E-01 1.38E+00 4.82E-01 0.00E+00 0.00E+00 1.84E+00 3.90E-01  
2.37E+00 6.25E-02 1.47E-01 1.79E+00 5.44E-01 0.00E+00 0.00E+00 1.72E+00 3.72E-01  
2.40E+00 5.09E-02 1.30E-01 2.25E+00 6.02E-01 0.00E+00 0.00E+00 1.59E+00 3.55E-01  
2.43E+00 4.39E-02 1.20E-01 2.75E+00 6.59E-01 0.00E+00 0.00E+00 1.46E+00 3.36E-01  
2.46E+00 3.70E-02 1.08E-01 3.24E+00 7.05E-01 0.00E+00 0.00E+00 1.33E+00 3.19E-01  
2.49E+00 3.18E-02 9.92E-02 3.69E+00 7.34E-01 0.00E+00 0.00E+00 1.22E+00 2.99E-01  
2.52E+00 2.81E-02 9.30E-02 4.05E+00 7.55E-01 0.00E+00 0.00E+00 1.11E+00 2.83E-01  
2.55E+00 2.59E-02 8.75E-02 4.29E+00 7.67E-01 0.00E+00 0.00E+00 1.01E+00 2.67E-01

2.58E+00 2.24E-02 8.06E-02 4.36E+00 7.65E-01 0.00E+00 0.00E+00 9.25E-01 2.52E-01  
2.61E+00 2.04E-02 7.60E-02 4.26E+00 7.47E-01 0.00E+00 0.00E+00 8.50E-01 2.39E-01  
2.64E+00 1.90E-02 7.19E-02 3.99E+00 7.09E-01 0.00E+00 0.00E+00 7.88E-01 2.29E-01  
2.67E+00 1.83E-02 7.05E-02 3.57E+00 6.62E-01 2.21E-06 5.49E-04 7.33E-01 2.18E-01  
2.70E+00 1.63E-02 6.54E-02 3.07E+00 6.11E-01 8.61E-06 1.07E-03 6.89E-01 2.11E-01  
2.73E+00 1.59E-02 6.38E-02 2.52E+00 5.47E-01 4.94E-05 2.52E-03 6.50E-01 2.03E-01  
2.76E+00 1.46E-02 6.10E-02 1.98E+00 4.83E-01 2.81E-04 5.88E-03 6.20E-01 1.95E-01  
2.79E+00 1.37E-02 5.84E-02 1.49E+00 4.17E-01 2.04E-03 1.57E-02 5.97E-01 1.91E-01  
2.82E+00 1.38E-02 5.79E-02 1.08E+00 3.52E-01 1.01E-02 3.45E-02 5.77E-01 1.86E-01  
2.85E+00 1.35E-02 5.66E-02 7.53E-01 2.96E-01 4.24E-02 7.05E-02 5.66E-01 1.83E-01  
2.88E+00 1.34E-02 5.58E-02 5.08E-01 2.43E-01 1.34E-01 1.24E-01 5.59E-01 1.80E-01  
2.91E+00 1.40E-02 5.70E-02 3.35E-01 1.96E-01 3.39E-01 1.96E-01 5.56E-01 1.77E-01  
2.94E+00 1.43E-02 5.70E-02 2.21E-01 1.59E-01 7.03E-01 2.80E-01 5.59E-01 1.76E-01  
2.97E+00 1.44E-02 5.58E-02 1.52E-01 1.31E-01 1.24E+00 3.64E-01 5.68E-01 1.76E-01  
3.00E+00 1.48E-02 5.73E-02 1.11E-01 1.12E-01 1.91E+00 4.40E-01 5.80E-01 1.76E-01  
3.03E+00 1.59E-02 5.82E-02 9.03E-02 9.96E-02 2.60E+00 5.01E-01 5.95E-01 1.75E-01  
3.06E+00 1.73E-02 6.00E-02 8.13E-02 9.36E-02 3.22E+00 5.49E-01 6.14E-01 1.78E-01  
3.09E+00 1.96E-02 6.39E-02 7.87E-02 9.08E-02 3.65E+00 5.77E-01 6.39E-01 1.78E-01  
3.12E+00 2.26E-02 6.74E-02 8.27E-02 9.17E-02 3.87E+00 5.90E-01 6.65E-01 1.80E-01  
3.15E+00 2.66E-02 7.25E-02 8.85E-02 9.44E-02 3.88E+00 5.86E-01 6.94E-01 1.82E-01  
3.18E+00 3.25E-02 7.96E-02 9.62E-02 9.66E-02 3.72E+00 5.75E-01 7.27E-01 1.84E-01  
3.21E+00 4.08E-02 8.83E-02 1.04E-01 9.99E-02 3.45E+00 5.52E-01 7.60E-01 1.86E-01  
3.24E+00 5.30E-02 9.93E-02 1.15E-01 1.04E-01 3.11E+00 5.21E-01 7.97E-01 1.88E-01  
3.27E+00 6.69E-02 1.10E-01 1.26E-01 1.08E-01 2.75E+00 4.89E-01 8.31E-01 1.91E-01  
3.30E+00 8.62E-02 1.23E-01 1.38E-01 1.12E-01 2.41E+00 4.54E-01 8.67E-01 1.93E-01  
3.33E+00 1.08E-01 1.38E-01 1.52E-01 1.17E-01 2.09E+00 4.21E-01 9.00E-01 1.93E-01  
3.36E+00 1.35E-01 1.51E-01 1.66E-01 1.21E-01 1.82E+00 3.87E-01 9.32E-01 1.96E-01  
3.39E+00 1.64E-01 1.64E-01 1.82E-01 1.26E-01 1.59E+00 3.60E-01 9.61E-01 1.96E-01  
3.42E+00 1.96E-01 1.78E-01 1.97E-01 1.29E-01 1.40E+00 3.34E-01 9.86E-01 1.96E-01  
3.45E+00 2.31E-01 1.92E-01 2.13E-01 1.34E-01 1.24E+00 3.11E-01 1.01E+00 1.98E-01  
3.48E+00 2.68E-01 2.04E-01 2.32E-01 1.38E-01 1.11E+00 2.91E-01 1.03E+00 1.96E-01  
3.51E+00 3.03E-01 2.15E-01 2.49E-01 1.42E-01 1.01E+00 2.75E-01 1.04E+00 1.95E-01  
3.54E+00 3.42E-01 2.26E-01 2.70E-01 1.46E-01 9.24E-01 2.62E-01 1.05E+00 1.95E-01  
3.57E+00 3.85E-01 2.36E-01 2.92E-01 1.51E-01 8.59E-01 2.48E-01 1.05E+00 1.94E-01  
3.60E+00 4.26E-01 2.48E-01 3.12E-01 1.55E-01 8.02E-01 2.39E-01 1.05E+00 1.93E-01  
3.63E+00 4.77E-01 2.60E-01 3.36E-01 1.58E-01 7.63E-01 2.32E-01 1.04E+00 1.91E-01  
3.66E+00 5.28E-01 2.71E-01 3.62E-01 1.62E-01 7.31E-01 2.24E-01 1.03E+00 1.89E-01  
3.69E+00 5.80E-01 2.78E-01 3.88E-01 1.66E-01 7.06E-01 2.20E-01 1.03E+00 1.86E-01  
3.72E+00 6.36E-01 2.90E-01 4.18E-01 1.71E-01 6.90E-01 2.15E-01 1.02E+00 1.85E-01  
3.75E+00 6.91E-01 3.00E-01 4.47E-01 1.75E-01 6.77E-01 2.11E-01 1.00E+00 1.82E-01  
3.78E+00 7.43E-01 3.10E-01 4.78E-01 1.78E-01 6.69E-01 2.07E-01 9.92E-01 1.80E-01  
3.81E+00 7.91E-01 3.13E-01 5.10E-01 1.83E-01 6.62E-01 2.05E-01 9.83E-01 1.79E-01

3.84E+00 8.32E-01 3.19E-01 5.44E-01 1.87E-01 6.58E-01 2.04E-01 9.74E-01 1.77E-01  
3.87E+00 8.65E-01 3.24E-01 5.77E-01 1.90E-01 6.59E-01 2.02E-01 9.68E-01 1.76E-01  
3.90E+00 8.99E-01 3.28E-01 6.13E-01 1.95E-01 6.59E-01 2.01E-01 9.61E-01 1.75E-01  
3.93E+00 9.26E-01 3.30E-01 6.52E-01 2.00E-01 6.62E-01 1.99E-01 9.55E-01 1.73E-01  
3.96E+00 9.48E-01 3.32E-01 6.89E-01 2.02E-01 6.65E-01 1.98E-01 9.47E-01 1.73E-01  
3.99E+00 9.69E-01 3.35E-01 7.26E-01 2.06E-01 6.71E-01 1.97E-01 9.38E-01 1.70E-01  
4.02E+00 9.92E-01 3.35E-01 7.62E-01 2.09E-01 6.79E-01 1.97E-01 9.27E-01 1.68E-01  
4.05E+00 1.01E+00 3.37E-01 8.01E-01 2.12E-01 6.85E-01 1.96E-01 9.14E-01 1.67E-01  
4.08E+00 1.03E+00 3.36E-01 8.41E-01 2.16E-01 6.92E-01 1.96E-01 8.99E-01 1.62E-01  
4.11E+00 1.05E+00 3.38E-01 8.77E-01 2.19E-01 7.03E-01 1.96E-01 8.84E-01 1.60E-01  
4.14E+00 1.08E+00 3.39E-01 9.13E-01 2.21E-01 7.16E-01 1.96E-01 8.67E-01 1.57E-01  
4.17E+00 1.10E+00 3.39E-01 9.48E-01 2.24E-01 7.31E-01 1.96E-01 8.52E-01 1.53E-01  
4.20E+00 1.12E+00 3.42E-01 9.83E-01 2.26E-01 7.52E-01 1.97E-01 8.39E-01 1.50E-01  
4.23E+00 1.14E+00 3.44E-01 1.01E+00 2.28E-01 7.75E-01 2.00E-01 8.28E-01 1.47E-01  
4.26E+00 1.16E+00 3.43E-01 1.04E+00 2.31E-01 8.01E-01 2.03E-01 8.22E-01 1.45E-01  
4.29E+00 1.18E+00 3.43E-01 1.07E+00 2.30E-01 8.23E-01 2.05E-01 8.18E-01 1.44E-01  
4.32E+00 1.20E+00 3.43E-01 1.10E+00 2.32E-01 8.43E-01 2.05E-01 8.18E-01 1.43E-01  
4.35E+00 1.21E+00 3.44E-01 1.12E+00 2.33E-01 8.57E-01 2.06E-01 8.21E-01 1.41E-01  
4.38E+00 1.23E+00 3.42E-01 1.15E+00 2.34E-01 8.62E-01 2.05E-01 8.26E-01 1.40E-01  
4.41E+00 1.23E+00 3.43E-01 1.16E+00 2.34E-01 8.64E-01 2.03E-01 8.32E-01 1.40E-01  
4.44E+00 1.25E+00 3.40E-01 1.18E+00 2.35E-01 8.59E-01 2.01E-01 8.40E-01 1.40E-01  
4.47E+00 1.25E+00 3.40E-01 1.19E+00 2.33E-01 8.53E-01 1.99E-01 8.50E-01 1.40E-01  
4.50E+00 1.26E+00 3.38E-01 1.21E+00 2.34E-01 8.47E-01 1.97E-01 8.59E-01 1.39E-01  
4.53E+00 1.26E+00 3.36E-01 1.22E+00 2.33E-01 8.41E-01 1.94E-01 8.69E-01 1.39E-01  
4.56E+00 1.26E+00 3.35E-01 1.22E+00 2.32E-01 8.38E-01 1.93E-01 8.81E-01 1.40E-01  
4.59E+00 1.26E+00 3.31E-01 1.23E+00 2.31E-01 8.36E-01 1.92E-01 8.91E-01 1.40E-01  
4.62E+00 1.26E+00 3.30E-01 1.23E+00 2.30E-01 8.37E-01 1.89E-01 9.03E-01 1.39E-01  
4.65E+00 1.25E+00 3.27E-01 1.24E+00 2.29E-01 8.38E-01 1.89E-01 9.16E-01 1.40E-01  
4.68E+00 1.23E+00 3.22E-01 1.24E+00 2.28E-01 8.42E-01 1.88E-01 9.28E-01 1.39E-01  
4.71E+00 1.22E+00 3.20E-01 1.24E+00 2.25E-01 8.47E-01 1.87E-01 9.41E-01 1.40E-01  
4.74E+00 1.20E+00 3.14E-01 1.24E+00 2.24E-01 8.51E-01 1.86E-01 9.52E-01 1.40E-01  
4.77E+00 1.19E+00 3.11E-01 1.23E+00 2.24E-01 8.56E-01 1.85E-01 9.64E-01 1.40E-01  
4.80E+00 1.17E+00 3.06E-01 1.23E+00 2.21E-01 8.60E-01 1.85E-01 9.77E-01 1.41E-01  
4.83E+00 1.14E+00 3.01E-01 1.22E+00 2.18E-01 8.66E-01 1.86E-01 9.86E-01 1.40E-01  
4.86E+00 1.12E+00 2.97E-01 1.22E+00 2.18E-01 8.73E-01 1.84E-01 9.95E-01 1.40E-01  
4.89E+00 1.10E+00 2.92E-01 1.22E+00 2.16E-01 8.78E-01 1.84E-01 1.00E+00 1.40E-01  
4.92E+00 1.09E+00 2.88E-01 1.21E+00 2.15E-01 8.84E-01 1.83E-01 1.01E+00 1.40E-01  
4.95E+00 1.07E+00 2.83E-01 1.21E+00 2.12E-01 8.90E-01 1.83E-01 1.01E+00 1.40E-01  
4.98E+00 1.05E+00 2.80E-01 1.20E+00 2.12E-01 8.97E-01 1.84E-01 1.02E+00 1.39E-01  
5.01E+00 1.04E+00 2.75E-01 1.20E+00 2.10E-01 9.05E-01 1.82E-01 1.02E+00 1.39E-01  
5.04E+00 1.02E+00 2.73E-01 1.20E+00 2.10E-01 9.12E-01 1.82E-01 1.02E+00 1.37E-01  
5.07E+00 1.01E+00 2.68E-01 1.20E+00 2.08E-01 9.17E-01 1.81E-01 1.02E+00 1.36E-01

5.10E+00 1.00E+00 2.68E-01 1.20E+00 2.05E-01 9.25E-01 1.81E-01 1.01E+00 1.36E-01  
5.13E+00 9.89E-01 2.63E-01 1.19E+00 2.05E-01 9.33E-01 1.81E-01 1.01E+00 1.35E-01  
5.16E+00 9.81E-01 2.61E-01 1.19E+00 2.04E-01 9.40E-01 1.81E-01 1.00E+00 1.33E-01  
5.19E+00 9.73E-01 2.58E-01 1.19E+00 2.04E-01 9.48E-01 1.80E-01 9.97E-01 1.32E-01  
5.22E+00 9.66E-01 2.57E-01 1.19E+00 2.01E-01 9.55E-01 1.80E-01 9.91E-01 1.30E-01  
5.25E+00 9.59E-01 2.54E-01 1.18E+00 1.98E-01 9.63E-01 1.80E-01 9.86E-01 1.30E-01  
5.28E+00 9.52E-01 2.51E-01 1.18E+00 1.99E-01 9.72E-01 1.79E-01 9.81E-01 1.28E-01  
5.31E+00 9.46E-01 2.50E-01 1.17E+00 1.95E-01 9.80E-01 1.79E-01 9.76E-01 1.27E-01  
5.34E+00 9.40E-01 2.49E-01 1.17E+00 1.94E-01 9.89E-01 1.78E-01 9.71E-01 1.27E-01  
5.37E+00 9.37E-01 2.45E-01 1.15E+00 1.92E-01 9.99E-01 1.78E-01 9.66E-01 1.25E-01  
5.40E+00 9.30E-01 2.44E-01 1.14E+00 1.90E-01 1.01E+00 1.78E-01 9.65E-01 1.23E-01  
5.43E+00 9.30E-01 2.43E-01 1.13E+00 1.88E-01 1.02E+00 1.79E-01 9.59E-01 1.23E-01  
5.46E+00 9.25E-01 2.40E-01 1.12E+00 1.86E-01 1.03E+00 1.80E-01 9.56E-01 1.23E-01  
5.49E+00 9.22E-01 2.39E-01 1.10E+00 1.84E-01 1.05E+00 1.79E-01 9.53E-01 1.20E-01  
5.52E+00 9.20E-01 2.37E-01 1.08E+00 1.81E-01 1.06E+00 1.80E-01 9.51E-01 1.20E-01  
5.55E+00 9.16E-01 2.35E-01 1.06E+00 1.79E-01 1.08E+00 1.79E-01 9.49E-01 1.20E-01  
5.58E+00 9.13E-01 2.33E-01 1.04E+00 1.76E-01 1.09E+00 1.79E-01 9.48E-01 1.19E-01  
5.61E+00 9.13E-01 2.32E-01 1.02E+00 1.73E-01 1.11E+00 1.79E-01 9.46E-01 1.18E-01  
5.64E+00 9.14E-01 2.31E-01 1.00E+00 1.70E-01 1.12E+00 1.80E-01 9.45E-01 1.17E-01  
5.67E+00 9.13E-01 2.29E-01 9.80E-01 1.67E-01 1.12E+00 1.80E-01 9.45E-01 1.17E-01  
5.70E+00 9.13E-01 2.27E-01 9.59E-01 1.65E-01 1.13E+00 1.77E-01 9.44E-01 1.16E-01  
5.73E+00 9.11E-01 2.26E-01 9.39E-01 1.63E-01 1.13E+00 1.78E-01 9.44E-01 1.16E-01  
5.76E+00 9.13E-01 2.23E-01 9.18E-01 1.61E-01 1.12E+00 1.76E-01 9.44E-01 1.15E-01  
5.79E+00 9.12E-01 2.24E-01 8.99E-01 1.57E-01 1.12E+00 1.76E-01 9.43E-01 1.14E-01  
5.82E+00 9.09E-01 2.21E-01 8.81E-01 1.55E-01 1.11E+00 1.74E-01 9.44E-01 1.14E-01  
5.85E+00 9.08E-01 2.21E-01 8.63E-01 1.53E-01 1.09E+00 1.72E-01 9.43E-01 1.13E-01  
5.88E+00 9.07E-01 2.18E-01 8.46E-01 1.51E-01 1.08E+00 1.71E-01 9.44E-01 1.13E-01  
5.91E+00 9.04E-01 2.17E-01 8.33E-01 1.48E-01 1.06E+00 1.68E-01 9.43E-01 1.12E-01  
5.94E+00 9.02E-01 2.16E-01 8.19E-01 1.47E-01 1.04E+00 1.66E-01 9.44E-01 1.12E-01  
5.97E+00 9.00E-01 2.15E-01 8.10E-01 1.45E-01 1.02E+00 1.64E-01 9.45E-01 1.11E-01  
6.00E+00 8.97E-01 2.14E-01 8.00E-01 1.44E-01 1.00E+00 1.61E-01 9.45E-01 1.12E-01  
6.03E+00 8.95E-01 2.13E-01 7.91E-01 1.43E-01 9.86E-01 1.59E-01 9.46E-01 1.10E-01  
6.06E+00 8.90E-01 2.11E-01 7.84E-01 1.40E-01 9.68E-01 1.57E-01 9.47E-01 1.10E-01  
6.09E+00 8.86E-01 2.11E-01 7.79E-01 1.41E-01 9.51E-01 1.55E-01 9.48E-01 1.09E-01  
6.12E+00 8.82E-01 2.08E-01 7.77E-01 1.39E-01 9.36E-01 1.53E-01 9.50E-01 1.08E-01  
6.15E+00 8.78E-01 2.07E-01 7.74E-01 1.39E-01 9.22E-01 1.52E-01 9.51E-01 1.09E-01  
6.18E+00 8.73E-01 2.05E-01 7.73E-01 1.37E-01 9.11E-01 1.49E-01 9.52E-01 1.08E-01  
6.21E+00 8.69E-01 2.04E-01 7.72E-01 1.37E-01 8.99E-01 1.48E-01 9.54E-01 1.08E-01  
6.24E+00 8.65E-01 2.02E-01 7.74E-01 1.37E-01 8.89E-01 1.46E-01 9.56E-01 1.07E-01  
6.27E+00 8.58E-01 2.01E-01 7.76E-01 1.36E-01 8.80E-01 1.45E-01 9.57E-01 1.06E-01  
6.30E+00 8.54E-01 2.00E-01 7.80E-01 1.36E-01 8.74E-01 1.43E-01 9.58E-01 1.06E-01  
6.33E+00 8.50E-01 1.98E-01 7.84E-01 1.36E-01 8.67E-01 1.42E-01 9.59E-01 1.06E-01

6.36E+00 8.48E-01 1.97E-01 7.89E-01 1.36E-01 8.64E-01 1.42E-01 9.60E-01 1.05E-01  
6.39E+00 8.43E-01 1.95E-01 7.94E-01 1.35E-01 8.60E-01 1.40E-01 9.60E-01 1.04E-01  
6.42E+00 8.41E-01 1.95E-01 8.01E-01 1.35E-01 8.56E-01 1.40E-01 9.58E-01 1.04E-01  
6.45E+00 8.39E-01 1.94E-01 8.08E-01 1.35E-01 8.55E-01 1.39E-01 9.59E-01 1.03E-01  
6.48E+00 8.39E-01 1.92E-01 8.16E-01 1.35E-01 8.53E-01 1.38E-01 9.58E-01 1.03E-01  
6.51E+00 8.39E-01 1.92E-01 8.25E-01 1.35E-01 8.52E-01 1.37E-01 9.56E-01 1.03E-01  
6.54E+00 8.40E-01 1.91E-01 8.34E-01 1.35E-01 8.53E-01 1.38E-01 9.55E-01 1.02E-01  
6.57E+00 8.41E-01 1.91E-01 8.42E-01 1.34E-01 8.55E-01 1.36E-01 9.54E-01 1.01E-01  
6.60E+00 8.42E-01 1.90E-01 8.51E-01 1.35E-01 8.54E-01 1.36E-01 9.51E-01 1.01E-01  
6.63E+00 8.46E-01 1.90E-01 8.61E-01 1.35E-01 8.55E-01 1.35E-01 9.49E-01 1.00E-01  
6.66E+00 8.48E-01 1.89E-01 8.71E-01 1.36E-01 8.56E-01 1.34E-01 9.45E-01 1.01E-01  
6.69E+00 8.51E-01 1.89E-01 8.82E-01 1.35E-01 8.58E-01 1.34E-01 9.42E-01 9.94E-02  
6.72E+00 8.55E-01 1.88E-01 8.90E-01 1.35E-01 8.60E-01 1.34E-01 9.40E-01 9.90E-02  
6.75E+00 8.61E-01 1.88E-01 8.99E-01 1.35E-01 8.63E-01 1.33E-01 9.38E-01 9.81E-02  
6.78E+00 8.67E-01 1.88E-01 9.09E-01 1.35E-01 8.65E-01 1.33E-01 9.34E-01 9.77E-02  
6.81E+00 8.74E-01 1.87E-01 9.18E-01 1.35E-01 8.67E-01 1.31E-01 9.32E-01 9.76E-02  
6.84E+00 8.80E-01 1.87E-01 9.28E-01 1.36E-01 8.70E-01 1.32E-01 9.30E-01 9.71E-02  
6.87E+00 8.89E-01 1.87E-01 9.36E-01 1.35E-01 8.74E-01 1.32E-01 9.28E-01 9.68E-02  
6.90E+00 8.97E-01 1.88E-01 9.45E-01 1.35E-01 8.77E-01 1.31E-01 9.26E-01 9.59E-02  
6.93E+00 9.06E-01 1.87E-01 9.54E-01 1.35E-01 8.80E-01 1.31E-01 9.24E-01 9.54E-02  
6.96E+00 9.18E-01 1.87E-01 9.62E-01 1.36E-01 8.82E-01 1.31E-01 9.24E-01 9.48E-02  
6.99E+00 9.28E-01 1.88E-01 9.71E-01 1.35E-01 8.87E-01 1.30E-01 9.23E-01 9.44E-02  
7.02E+00 9.42E-01 1.87E-01 9.80E-01 1.36E-01 8.91E-01 1.30E-01 9.23E-01 9.39E-02  
7.05E+00 9.51E-01 1.88E-01 9.88E-01 1.36E-01 8.95E-01 1.30E-01 9.23E-01 9.39E-02  
7.08E+00 9.66E-01 1.88E-01 9.96E-01 1.36E-01 8.98E-01 1.30E-01 9.23E-01 9.33E-02  
7.11E+00 9.77E-01 1.89E-01 1.00E+00 1.36E-01 9.03E-01 1.29E-01 9.24E-01 9.24E-02  
7.14E+00 9.88E-01 1.89E-01 1.01E+00 1.36E-01 9.07E-01 1.28E-01 9.25E-01 9.18E-02  
7.17E+00 1.00E+00 1.90E-01 1.02E+00 1.35E-01 9.10E-01 1.29E-01 9.26E-01 9.20E-02  
7.20E+00 1.01E+00 1.89E-01 1.02E+00 1.35E-01 9.15E-01 1.28E-01 9.28E-01 9.14E-02  
7.23E+00 1.02E+00 1.90E-01 1.03E+00 1.35E-01 9.19E-01 1.28E-01 9.29E-01 9.11E-02  
7.26E+00 1.03E+00 1.90E-01 1.04E+00 1.35E-01 9.24E-01 1.28E-01 9.32E-01 9.09E-02  
7.29E+00 1.04E+00 1.91E-01 1.04E+00 1.34E-01 9.28E-01 1.27E-01 9.34E-01 9.04E-02  
7.32E+00 1.05E+00 1.91E-01 1.05E+00 1.34E-01 9.35E-01 1.27E-01 9.36E-01 9.05E-02  
7.35E+00 1.06E+00 1.91E-01 1.05E+00 1.34E-01 9.37E-01 1.27E-01 9.39E-01 9.02E-02  
7.38E+00 1.07E+00 1.91E-01 1.06E+00 1.33E-01 9.42E-01 1.26E-01 9.42E-01 8.97E-02  
7.41E+00 1.07E+00 1.90E-01 1.06E+00 1.34E-01 9.48E-01 1.26E-01 9.45E-01 8.93E-02  
7.44E+00 1.08E+00 1.90E-01 1.07E+00 1.33E-01 9.54E-01 1.26E-01 9.48E-01 8.85E-02  
7.47E+00 1.08E+00 1.89E-01 1.07E+00 1.33E-01 9.57E-01 1.26E-01 9.52E-01 8.94E-02  
7.50E+00 1.09E+00 1.89E-01 1.07E+00 1.32E-01 9.63E-01 1.26E-01 9.55E-01 8.85E-02  
7.53E+00 1.09E+00 1.88E-01 1.08E+00 1.33E-01 9.69E-01 1.26E-01 9.58E-01 8.85E-02  
7.56E+00 1.10E+00 1.88E-01 1.08E+00 1.32E-01 9.73E-01 1.25E-01 9.62E-01 8.82E-02  
7.59E+00 1.10E+00 1.87E-01 1.08E+00 1.31E-01 9.77E-01 1.25E-01 9.66E-01 8.82E-02



7.62E+00 1.10E+00 1.87E-01 1.08E+00 1.31E-01 9.82E-01 1.26E-01 9.68E-01 8.79E-02  
7.65E+00 1.10E+00 1.86E-01 1.08E+00 1.30E-01 9.86E-01 1.25E-01 9.73E-01 8.76E-02  
7.68E+00 1.10E+00 1.85E-01 1.08E+00 1.30E-01 9.91E-01 1.25E-01 9.76E-01 8.82E-02  
7.71E+00 1.10E+00 1.84E-01 1.08E+00 1.29E-01 9.96E-01 1.24E-01 9.80E-01 8.73E-02  
7.74E+00 1.10E+00 1.83E-01 1.08E+00 1.29E-01 1.00E+00 1.24E-01 9.82E-01 8.78E-02  
7.77E+00 1.10E+00 1.83E-01 1.08E+00 1.29E-01 1.00E+00 1.24E-01 9.86E-01 8.67E-02  
7.80E+00 1.10E+00 1.82E-01 1.08E+00 1.27E-01 1.01E+00 1.24E-01 9.89E-01 8.64E-02  
7.83E+00 1.10E+00 1.81E-01 1.08E+00 1.28E-01 1.01E+00 1.23E-01 9.91E-01 8.62E-02  
7.86E+00 1.10E+00 1.81E-01 1.08E+00 1.27E-01 1.01E+00 1.24E-01 9.94E-01 8.61E-02  
7.89E+00 1.09E+00 1.79E-01 1.08E+00 1.26E-01 1.02E+00 1.23E-01 9.97E-01 8.67E-02  
7.92E+00 1.09E+00 1.79E-01 1.08E+00 1.25E-01 1.02E+00 1.23E-01 9.99E-01 8.57E-02  
7.95E+00 1.09E+00 1.79E-01 1.07E+00 1.25E-01 1.02E+00 1.22E-01 1.00E+00 8.61E-02  
7.98E+00 1.09E+00 1.77E-01 1.07E+00 1.25E-01 1.02E+00 1.21E-01 1.00E+00 8.52E-02  
8.01E+00 1.08E+00 1.77E-01 1.07E+00 1.24E-01 1.03E+00 1.21E-01 1.01E+00 8.56E-02  
8.04E+00 1.08E+00 1.75E-01 1.06E+00 1.23E-01 1.03E+00 1.21E-01 1.01E+00 8.47E-02  
8.07E+00 1.08E+00 1.76E-01 1.06E+00 1.22E-01 1.03E+00 1.20E-01 1.01E+00 8.47E-02  
8.10E+00 1.07E+00 1.74E-01 1.06E+00 1.22E-01 1.03E+00 1.21E-01 1.01E+00 8.45E-02  
8.13E+00 1.07E+00 1.73E-01 1.05E+00 1.22E-01 1.03E+00 1.20E-01 1.01E+00 8.40E-02  
8.16E+00 1.07E+00 1.72E-01 1.05E+00 1.20E-01 1.03E+00 1.19E-01 1.01E+00 8.37E-02  
8.19E+00 1.06E+00 1.72E-01 1.04E+00 1.20E-01 1.03E+00 1.18E-01 1.01E+00 8.36E-02  
8.22E+00 1.06E+00 1.71E-01 1.04E+00 1.20E-01 1.04E+00 1.18E-01 1.01E+00 8.34E-02  
8.25E+00 1.05E+00 1.70E-01 1.03E+00 1.18E-01 1.04E+00 1.18E-01 1.01E+00 8.31E-02  
8.28E+00 1.05E+00 1.70E-01 1.02E+00 1.17E-01 1.04E+00 1.18E-01 1.02E+00 8.27E-02  
8.31E+00 1.04E+00 1.68E-01 1.02E+00 1.17E-01 1.04E+00 1.17E-01 1.02E+00 8.27E-02  
8.34E+00 1.04E+00 1.67E-01 1.01E+00 1.16E-01 1.04E+00 1.17E-01 1.02E+00 8.21E-02  
8.37E+00 1.03E+00 1.65E-01 1.01E+00 1.16E-01 1.04E+00 1.17E-01 1.02E+00 8.15E-02  
8.40E+00 1.03E+00 1.64E-01 1.00E+00 1.14E-01 1.03E+00 1.16E-01 1.02E+00 8.18E-02  
8.43E+00 1.03E+00 1.64E-01 9.96E-01 1.14E-01 1.03E+00 1.16E-01 1.02E+00 8.08E-02  
8.46E+00 1.02E+00 1.61E-01 9.90E-01 1.13E-01 1.03E+00 1.15E-01 1.02E+00 8.08E-02  
8.49E+00 1.01E+00 1.61E-01 9.86E-01 1.13E-01 1.03E+00 1.15E-01 1.02E+00 8.04E-02  
8.52E+00 1.01E+00 1.59E-01 9.81E-01 1.12E-01 1.03E+00 1.14E-01 1.02E+00 8.04E-02  
8.55E+00 1.00E+00 1.59E-01 9.76E-01 1.11E-01 1.03E+00 1.13E-01 1.02E+00 8.04E-02  
8.58E+00 9.97E-01 1.59E-01 9.71E-01 1.11E-01 1.02E+00 1.14E-01 1.02E+00 8.00E-02  
8.61E+00 9.90E-01 1.57E-01 9.67E-01 1.11E-01 1.02E+00 1.13E-01 1.02E+00 7.92E-02  
8.64E+00 9.86E-01 1.58E-01 9.63E-01 1.10E-01 1.02E+00 1.12E-01 1.02E+00 7.90E-02  
8.67E+00 9.80E-01 1.56E-01 9.59E-01 1.09E-01 1.02E+00 1.11E-01 1.02E+00 7.87E-02  
8.70E+00 9.75E-01 1.54E-01 9.55E-01 1.08E-01 1.02E+00 1.12E-01 1.02E+00 7.88E-02  
8.73E+00 9.69E-01 1.53E-01 9.53E-01 1.08E-01 1.01E+00 1.10E-01 1.02E+00 7.82E-02  
8.76E+00 9.63E-01 1.52E-01 9.49E-01 1.07E-01 1.01E+00 1.10E-01 1.02E+00 7.84E-02  
8.79E+00 9.60E-01 1.52E-01 9.47E-01 1.07E-01 1.01E+00 1.09E-01 1.02E+00 7.77E-02  
8.82E+00 9.57E-01 1.52E-01 9.43E-01 1.07E-01 1.01E+00 1.09E-01 1.01E+00 7.72E-02  
8.85E+00 9.51E-01 1.49E-01 9.41E-01 1.06E-01 1.01E+00 1.08E-01 1.01E+00 7.73E-02

8.88E+00 9.46E-01 1.50E-01 9.39E-01 1.06E-01 1.00E+00 1.08E-01 1.01E+00 7.74E-02  
 8.91E+00 9.44E-01 1.49E-01 9.38E-01 1.05E-01 1.00E+00 1.08E-01 1.01E+00 7.68E-02  
 8.94E+00 9.40E-01 1.47E-01 9.37E-01 1.04E-01 1.00E+00 1.08E-01 1.01E+00 7.63E-02  
 8.97E+00 9.38E-01 1.47E-01 9.36E-01 1.04E-01 9.97E-01 1.07E-01 1.01E+00 7.61E-02  
 9.00E+00 9.35E-01 1.46E-01 9.35E-01 1.04E-01 9.97E-01 1.06E-01 1.01E+00 7.56E-02  
 9.03E+00 9.34E-01 1.45E-01 9.34E-01 1.03E-01 9.95E-01 1.06E-01 1.01E+00 7.52E-02  
 9.06E+00 9.32E-01 1.46E-01 9.35E-01 1.03E-01 9.94E-01 1.06E-01 1.01E+00 7.52E-02  
 9.09E+00 9.30E-01 1.44E-01 9.34E-01 1.03E-01 9.92E-01 1.05E-01 1.00E+00 7.47E-02  
 9.12E+00 9.28E-01 1.45E-01 9.34E-01 1.02E-01 9.91E-01 1.05E-01 1.00E+00 7.45E-02  
 9.15E+00 9.27E-01 1.43E-01 9.35E-01 1.02E-01 9.90E-01 1.04E-01 1.00E+00 7.44E-02  
 9.18E+00 9.26E-01 1.43E-01 9.35E-01 1.02E-01 9.89E-01 1.04E-01 1.00E+00 7.38E-02  
 9.21E+00 9.26E-01 1.42E-01 9.36E-01 1.01E-01 9.89E-01 1.04E-01 1.00E+00 7.37E-02  
 9.24E+00 9.27E-01 1.43E-01 9.36E-01 1.01E-01 9.88E-01 1.03E-01 9.99E-01 7.33E-02  
 9.27E+00 9.27E-01 1.41E-01 9.37E-01 1.01E-01 9.88E-01 1.03E-01 9.97E-01 7.31E-02  
 9.30E+00 9.28E-01 1.41E-01 9.39E-01 1.00E-01 9.88E-01 1.02E-01 9.96E-01 7.29E-02  
 9.33E+00 9.28E-01 1.41E-01 9.41E-01 1.00E-01 9.87E-01 1.02E-01 9.94E-01 7.23E-02  
 9.36E+00 9.29E-01 1.41E-01 9.42E-01 9.98E-02 9.87E-01 1.02E-01 9.93E-01 7.26E-02  
 9.39E+00 9.30E-01 1.40E-01 9.45E-01 9.93E-02 9.87E-01 1.01E-01 9.92E-01 7.22E-02  
 9.42E+00 9.34E-01 1.39E-01 9.46E-01 9.92E-02 9.86E-01 1.01E-01 9.91E-01 7.18E-02  
 9.45E+00 9.35E-01 1.39E-01 9.48E-01 9.93E-02 9.87E-01 1.01E-01 9.90E-01 7.16E-02  
 9.48E+00 9.37E-01 1.39E-01 9.51E-01 9.92E-02 9.86E-01 9.99E-02 9.89E-01 7.09E-02  
 9.51E+00 9.39E-01 1.38E-01 9.54E-01 9.91E-02 9.86E-01 1.01E-01 9.89E-01 7.13E-02  
 9.54E+00 9.40E-01 1.38E-01 9.56E-01 9.84E-02 9.87E-01 1.00E-01 9.87E-01 7.07E-02  
 9.57E+00 9.42E-01 1.38E-01 9.60E-01 9.88E-02 9.87E-01 9.98E-02 9.86E-01 7.06E-02  
 9.60E+00 9.45E-01 1.38E-01 9.63E-01 9.83E-02 9.88E-01 1.00E-01 9.87E-01 7.01E-02  
 9.63E+00 9.49E-01 1.37E-01 9.65E-01 9.83E-02 9.89E-01 9.98E-02 9.86E-01 7.02E-02  
 9.66E+00 9.51E-01 1.38E-01 9.69E-01 9.87E-02 9.89E-01 9.85E-02 9.85E-01 6.96E-02  
 9.69E+00 9.54E-01 1.37E-01 9.72E-01 9.81E-02 9.90E-01 9.89E-02 9.85E-01 6.96E-02  
 9.72E+00 9.58E-01 1.38E-01 9.76E-01 9.75E-02 9.90E-01 9.80E-02 9.85E-01 6.93E-02  
 9.75E+00 9.62E-01 1.37E-01 9.79E-01 9.76E-02 9.90E-01 9.83E-02 9.85E-01 6.89E-02  
 9.78E+00 9.64E-01 1.37E-01 9.82E-01 9.81E-02 9.90E-01 9.77E-02 9.85E-01 6.89E-02  
 9.81E+00 9.68E-01 1.37E-01 9.86E-01 9.75E-02 9.91E-01 9.75E-02 9.86E-01 6.91E-02  
 9.84E+00 9.72E-01 1.37E-01 9.89E-01 9.74E-02 9.92E-01 9.73E-02 9.86E-01 6.88E-02  
 9.87E+00 9.75E-01 1.36E-01 9.93E-01 9.79E-02 9.92E-01 9.66E-02 9.87E-01 6.84E-02  
 9.90E+00 9.79E-01 1.37E-01 9.96E-01 9.69E-02 9.93E-01 9.64E-02 9.87E-01 6.84E-02  
 9.93E+00 9.85E-01 1.36E-01 1.00E+00 9.71E-02 9.93E-01 9.64E-02 9.88E-01 6.79E-02  
 9.96E+00 9.88E-01 1.37E-01 1.00E+00 9.66E-02 9.95E-01 9.64E-02 9.88E-01 6.82E-02  
 9.99E+00 9.93E-01 1.36E-01 1.01E+00 9.68E-02 9.95E-01 9.58E-02 9.89E-01 6.75E-02  
 1.00E+01 9.96E-01 1.36E-01 1.01E+00 9.67E-02 9.96E-01 9.57E-02 9.89E-01 6.73E-02

2 m MgCl<sub>2</sub>-Water g(r) at 1 GPa 500 K; distance  $r$ ,  $g(r)$  and errors

|   |       |       |       |       |
|---|-------|-------|-------|-------|
| r | Mg-Ow | Mg-Hw | Cl-Ow | Cl-Hw |
|---|-------|-------|-------|-------|

[illegible]

1.23E+00 0.00E+00 0.00E+00 0.00E+00 0.00E+00 0.00E+00 0.00E+00 0.00E+00 0.00E+00  
1.26E+00 0.00E+00 0.00E+00 0.00E+00 0.00E+00 0.00E+00 0.00E+00 0.00E+00 0.00E+00  
1.29E+00 0.00E+00 0.00E+00 0.00E+00 0.00E+00 0.00E+00 0.00E+00 0.00E+00 0.00E+00  
1.32E+00 0.00E+00 0.00E+00 0.00E+00 0.00E+00 0.00E+00 0.00E+00 0.00E+00 0.00E+00  
1.35E+00 0.00E+00 0.00E+00 0.00E+00 0.00E+00 0.00E+00 0.00E+00 0.00E+00 0.00E+00  
1.38E+00 0.00E+00 0.00E+00 0.00E+00 0.00E+00 0.00E+00 0.00E+00 0.00E+00 0.00E+00  
1.41E+00 0.00E+00 0.00E+00 0.00E+00 0.00E+00 0.00E+00 0.00E+00 0.00E+00 0.00E+00  
1.44E+00 0.00E+00 0.00E+00 0.00E+00 0.00E+00 0.00E+00 0.00E+00 0.00E+00 0.00E+00  
1.47E+00 0.00E+00 0.00E+00 0.00E+00 0.00E+00 0.00E+00 0.00E+00 1.48E-05 1.93E-03  
1.50E+00 0.00E+00 0.00E+00 9.36E-06 2.12E-03 0.00E+00 0.00E+00 0.00E+00 0.00E+00  
1.53E+00 0.00E+00 0.00E+00 0.00E+00 0.00E+00 0.00E+00 0.00E+00 1.82E-05 2.06E-03  
1.56E+00 1.73E-05 3.92E-03 0.00E+00 0.00E+00 0.00E+00 0.00E+00 1.09E-04 4.84E-03  
1.59E+00 0.00E+00 0.00E+00 0.00E+00 0.00E+00 0.00E+00 0.00E+00 1.79E-04 6.03E-03  
1.62E+00 4.85E-05 6.34E-03 4.86E-05 4.49E-03 0.00E+00 0.00E+00 3.95E-04 8.96E-03  
1.65E+00 1.64E-04 1.24E-02 1.57E-05 2.51E-03 0.00E+00 0.00E+00 1.07E-03 1.44E-02  
1.68E+00 1.87E-03 3.77E-02 7.90E-05 5.45E-03 0.00E+00 0.00E+00 2.46E-03 2.13E-02  
1.71E+00 1.63E-02 1.09E-01 1.16E-04 6.47E-03 0.00E+00 0.00E+00 5.09E-03 3.02E-02  
1.74E+00 1.30E-01 3.03E-01 1.44E-04 7.14E-03 0.00E+00 0.00E+00 1.05E-02 4.28E-02  
1.77E+00 6.72E-01 6.82E-01 3.19E-04 1.04E-02 0.00E+00 0.00E+00 1.93E-02 5.68E-02  
1.80E+00 2.17E+00 1.18E+00 2.75E-04 9.31E-03 0.00E+00 0.00E+00 3.46E-02 7.52E-02  
1.83E+00 4.83E+00 1.69E+00 6.28E-04 1.43E-02 0.00E+00 0.00E+00 5.82E-02 9.62E-02  
1.86E+00 7.95E+00 2.09E+00 8.63E-04 1.61E-02 0.00E+00 0.00E+00 9.28E-02 1.19E-01  
1.89E+00 1.05E+01 2.35E+00 1.20E-03 1.89E-02 0.00E+00 0.00E+00 1.42E-01 1.46E-01  
1.92E+00 1.16E+01 2.48E+00 1.93E-03 2.34E-02 0.00E+00 0.00E+00 2.04E-01 1.72E-01  
1.95E+00 1.13E+01 2.47E+00 3.39E-03 3.10E-02 0.00E+00 0.00E+00 2.84E-01 1.99E-01  
1.98E+00 9.91E+00 2.31E+00 5.28E-03 3.80E-02 0.00E+00 0.00E+00 3.77E-01 2.26E-01  
2.01E+00 8.17E+00 2.08E+00 8.45E-03 4.76E-02 0.00E+00 0.00E+00 4.80E-01 2.53E-01  
2.04E+00 6.38E+00 1.80E+00 1.49E-02 6.20E-02 0.00E+00 0.00E+00 5.92E-01 2.76E-01  
2.07E+00 4.84E+00 1.54E+00 2.41E-02 7.84E-02 0.00E+00 0.00E+00 7.12E-01 2.98E-01  
2.10E+00 3.61E+00 1.31E+00 3.92E-02 9.82E-02 0.00E+00 0.00E+00 8.26E-01 3.18E-01  
2.13E+00 2.68E+00 1.11E+00 6.46E-02 1.24E-01 0.00E+00 0.00E+00 9.33E-01 3.35E-01  
2.16E+00 1.97E+00 9.39E-01 1.02E-01 1.54E-01 0.00E+00 0.00E+00 1.03E+00 3.47E-01  
2.19E+00 1.46E+00 7.93E-01 1.63E-01 1.91E-01 0.00E+00 0.00E+00 1.11E+00 3.56E-01  
2.22E+00 1.09E+00 6.80E-01 2.45E-01 2.30E-01 0.00E+00 0.00E+00 1.17E+00 3.63E-01  
2.25E+00 8.30E-01 5.88E-01 3.61E-01 2.76E-01 0.00E+00 0.00E+00 1.22E+00 3.66E-01  
2.28E+00 6.34E-01 5.06E-01 5.22E-01 3.28E-01 0.00E+00 0.00E+00 1.24E+00 3.62E-01  
2.31E+00 4.92E-01 4.41E-01 7.30E-01 3.82E-01 0.00E+00 0.00E+00 1.25E+00 3.60E-01  
2.34E+00 3.87E-01 3.85E-01 9.98E-01 4.42E-01 0.00E+00 0.00E+00 1.25E+00 3.54E-01  
2.37E+00 3.10E-01 3.42E-01 1.32E+00 4.98E-01 0.00E+00 0.00E+00 1.23E+00 3.47E-01  
2.40E+00 2.53E-01 3.05E-01 1.68E+00 5.58E-01 0.00E+00 0.00E+00 1.21E+00 3.36E-01  
2.43E+00 2.09E-01 2.75E-01 2.09E+00 6.11E-01 0.00E+00 0.00E+00 1.17E+00 3.28E-01  
2.46E+00 1.76E-01 2.47E-01 2.50E+00 6.60E-01 0.00E+00 0.00E+00 1.14E+00 3.20E-01

2.49E+00 1.49E-01 2.26E-01 2.91E+00 6.97E-01 0.00E+00 0.00E+00 1.10E+00 3.08E-01  
2.52E+00 1.27E-01 2.06E-01 3.27E+00 7.38E-01 0.00E+00 0.00E+00 1.06E+00 2.98E-01  
2.55E+00 1.11E-01 1.91E-01 3.55E+00 7.62E-01 0.00E+00 0.00E+00 1.01E+00 2.89E-01  
2.58E+00 9.79E-02 1.77E-01 3.74E+00 7.73E-01 0.00E+00 0.00E+00 9.76E-01 2.79E-01  
2.61E+00 8.76E-02 1.65E-01 3.80E+00 7.78E-01 0.00E+00 0.00E+00 9.35E-01 2.71E-01  
2.64E+00 7.96E-02 1.56E-01 3.75E+00 7.66E-01 3.05E-06 6.90E-04 9.00E-01 2.63E-01  
2.67E+00 7.12E-02 1.46E-01 3.57E+00 7.44E-01 2.97E-06 6.72E-04 8.69E-01 2.54E-01  
2.70E+00 6.74E-02 1.39E-01 3.29E+00 7.06E-01 5.39E-05 2.78E-03 8.44E-01 2.46E-01  
2.73E+00 6.17E-02 1.32E-01 2.93E+00 6.57E-01 2.98E-04 6.52E-03 8.18E-01 2.42E-01  
2.76E+00 5.95E-02 1.28E-01 2.54E+00 6.05E-01 1.28E-03 1.32E-02 7.99E-01 2.37E-01  
2.79E+00 5.56E-02 1.23E-01 2.13E+00 5.45E-01 5.39E-03 2.72E-02 7.77E-01 2.29E-01  
2.82E+00 5.26E-02 1.19E-01 1.74E+00 4.89E-01 1.83E-02 4.94E-02 7.68E-01 2.25E-01  
2.85E+00 5.17E-02 1.17E-01 1.38E+00 4.29E-01 5.11E-02 8.18E-02 7.63E-01 2.23E-01  
2.88E+00 5.11E-02 1.14E-01 1.08E+00 3.73E-01 1.20E-01 1.24E-01 7.55E-01 2.20E-01  
2.91E+00 4.99E-02 1.12E-01 8.25E-01 3.24E-01 2.43E-01 1.74E-01 7.56E-01 2.17E-01  
2.94E+00 5.07E-02 1.12E-01 6.32E-01 2.80E-01 4.37E-01 2.32E-01 7.57E-01 2.15E-01  
2.97E+00 5.00E-02 1.10E-01 4.82E-01 2.41E-01 6.97E-01 2.92E-01 7.63E-01 2.14E-01  
3.00E+00 5.01E-02 1.10E-01 3.74E-01 2.11E-01 1.02E+00 3.48E-01 7.74E-01 2.12E-01  
3.03E+00 5.18E-02 1.10E-01 2.98E-01 1.88E-01 1.37E+00 4.02E-01 7.85E-01 2.13E-01  
3.06E+00 5.33E-02 1.11E-01 2.44E-01 1.67E-01 1.71E+00 4.46E-01 7.99E-01 2.12E-01  
3.09E+00 5.43E-02 1.11E-01 2.11E-01 1.54E-01 2.03E+00 4.77E-01 8.17E-01 2.12E-01  
3.12E+00 5.76E-02 1.12E-01 1.88E-01 1.45E-01 2.28E+00 5.04E-01 8.36E-01 2.13E-01  
3.15E+00 6.02E-02 1.15E-01 1.77E-01 1.39E-01 2.46E+00 5.12E-01 8.55E-01 2.14E-01  
3.18E+00 6.42E-02 1.18E-01 1.73E-01 1.36E-01 2.55E+00 5.19E-01 8.75E-01 2.12E-01  
3.21E+00 7.09E-02 1.22E-01 1.73E-01 1.36E-01 2.58E+00 5.17E-01 8.97E-01 2.14E-01  
3.24E+00 7.86E-02 1.26E-01 1.79E-01 1.36E-01 2.55E+00 5.06E-01 9.20E-01 2.14E-01  
3.27E+00 8.80E-02 1.33E-01 1.86E-01 1.38E-01 2.46E+00 4.92E-01 9.41E-01 2.16E-01  
3.30E+00 1.00E-01 1.42E-01 1.95E-01 1.40E-01 2.35E+00 4.75E-01 9.61E-01 2.15E-01  
3.33E+00 1.15E-01 1.50E-01 2.08E-01 1.42E-01 2.23E+00 4.60E-01 9.83E-01 2.16E-01  
3.36E+00 1.34E-01 1.60E-01 2.19E-01 1.45E-01 2.09E+00 4.40E-01 1.00E+00 2.17E-01  
3.39E+00 1.57E-01 1.70E-01 2.34E-01 1.48E-01 1.96E+00 4.22E-01 1.02E+00 2.16E-01  
3.42E+00 1.83E-01 1.84E-01 2.49E-01 1.51E-01 1.83E+00 4.06E-01 1.03E+00 2.16E-01  
3.45E+00 2.17E-01 1.97E-01 2.66E-01 1.55E-01 1.71E+00 3.88E-01 1.05E+00 2.16E-01  
3.48E+00 2.57E-01 2.15E-01 2.86E-01 1.59E-01 1.60E+00 3.73E-01 1.05E+00 2.15E-01  
3.51E+00 3.00E-01 2.28E-01 3.04E-01 1.63E-01 1.50E+00 3.57E-01 1.07E+00 2.14E-01  
3.54E+00 3.51E-01 2.43E-01 3.26E-01 1.67E-01 1.42E+00 3.46E-01 1.07E+00 2.13E-01  
3.57E+00 4.04E-01 2.59E-01 3.49E-01 1.72E-01 1.34E+00 3.33E-01 1.08E+00 2.12E-01  
3.60E+00 4.64E-01 2.75E-01 3.71E-01 1.74E-01 1.28E+00 3.22E-01 1.08E+00 2.09E-01  
3.63E+00 5.30E-01 2.91E-01 3.97E-01 1.80E-01 1.22E+00 3.13E-01 1.08E+00 2.07E-01  
3.66E+00 5.93E-01 3.06E-01 4.24E-01 1.83E-01 1.17E+00 3.02E-01 1.08E+00 2.06E-01  
3.69E+00 6.64E-01 3.22E-01 4.50E-01 1.88E-01 1.12E+00 2.95E-01 1.08E+00 2.04E-01  
3.72E+00 7.32E-01 3.33E-01 4.79E-01 1.93E-01 1.08E+00 2.86E-01 1.08E+00 2.02E-01

3.75E+00 8.04E-01 3.48E-01 5.08E-01 1.96E-01 1.05E+00 2.79E-01 1.08E+00 2.00E-01  
3.78E+00 8.70E-01 3.56E-01 5.37E-01 1.99E-01 1.02E+00 2.74E-01 1.08E+00 1.99E-01  
3.81E+00 9.34E-01 3.68E-01 5.72E-01 2.04E-01 1.00E+00 2.68E-01 1.08E+00 1.97E-01  
3.84E+00 9.95E-01 3.76E-01 6.04E-01 2.09E-01 9.75E-01 2.63E-01 1.07E+00 1.95E-01  
3.87E+00 1.05E+00 3.84E-01 6.41E-01 2.13E-01 9.58E-01 2.59E-01 1.07E+00 1.94E-01  
3.90E+00 1.10E+00 3.88E-01 6.76E-01 2.16E-01 9.42E-01 2.56E-01 1.07E+00 1.93E-01  
3.93E+00 1.15E+00 3.94E-01 7.11E-01 2.20E-01 9.27E-01 2.52E-01 1.07E+00 1.90E-01  
3.96E+00 1.18E+00 3.95E-01 7.49E-01 2.24E-01 9.14E-01 2.49E-01 1.06E+00 1.87E-01  
3.99E+00 1.21E+00 3.99E-01 7.84E-01 2.28E-01 9.04E-01 2.44E-01 1.06E+00 1.86E-01  
4.02E+00 1.24E+00 3.98E-01 8.26E-01 2.32E-01 8.95E-01 2.40E-01 1.05E+00 1.85E-01  
4.05E+00 1.25E+00 4.00E-01 8.63E-01 2.35E-01 8.86E-01 2.38E-01 1.05E+00 1.83E-01  
4.08E+00 1.26E+00 3.98E-01 8.98E-01 2.39E-01 8.83E-01 2.34E-01 1.03E+00 1.80E-01  
4.11E+00 1.27E+00 3.95E-01 9.37E-01 2.41E-01 8.77E-01 2.33E-01 1.02E+00 1.78E-01  
4.14E+00 1.27E+00 3.94E-01 9.73E-01 2.43E-01 8.75E-01 2.31E-01 1.01E+00 1.75E-01  
4.17E+00 1.28E+00 3.92E-01 1.01E+00 2.45E-01 8.74E-01 2.30E-01 9.93E-01 1.72E-01  
4.20E+00 1.27E+00 3.89E-01 1.04E+00 2.47E-01 8.74E-01 2.28E-01 9.78E-01 1.71E-01  
4.23E+00 1.27E+00 3.87E-01 1.07E+00 2.51E-01 8.77E-01 2.27E-01 9.66E-01 1.68E-01  
4.26E+00 1.27E+00 3.83E-01 1.10E+00 2.51E-01 8.79E-01 2.25E-01 9.50E-01 1.66E-01  
4.29E+00 1.26E+00 3.79E-01 1.13E+00 2.54E-01 8.80E-01 2.25E-01 9.41E-01 1.64E-01  
4.32E+00 1.26E+00 3.76E-01 1.16E+00 2.54E-01 8.85E-01 2.23E-01 9.28E-01 1.62E-01  
4.35E+00 1.25E+00 3.72E-01 1.18E+00 2.55E-01 8.83E-01 2.21E-01 9.22E-01 1.60E-01  
4.38E+00 1.25E+00 3.71E-01 1.21E+00 2.56E-01 8.85E-01 2.21E-01 9.16E-01 1.58E-01  
4.41E+00 1.24E+00 3.67E-01 1.22E+00 2.57E-01 8.83E-01 2.18E-01 9.14E-01 1.56E-01  
4.44E+00 1.24E+00 3.62E-01 1.24E+00 2.56E-01 8.81E-01 2.18E-01 9.10E-01 1.55E-01  
4.47E+00 1.23E+00 3.61E-01 1.25E+00 2.56E-01 8.76E-01 2.14E-01 9.10E-01 1.55E-01  
4.50E+00 1.23E+00 3.57E-01 1.26E+00 2.55E-01 8.77E-01 2.13E-01 9.10E-01 1.53E-01  
4.53E+00 1.23E+00 3.53E-01 1.27E+00 2.56E-01 8.72E-01 2.13E-01 9.12E-01 1.52E-01  
4.56E+00 1.22E+00 3.51E-01 1.28E+00 2.53E-01 8.69E-01 2.09E-01 9.15E-01 1.52E-01  
4.59E+00 1.21E+00 3.47E-01 1.28E+00 2.51E-01 8.66E-01 2.10E-01 9.16E-01 1.51E-01  
4.62E+00 1.21E+00 3.43E-01 1.28E+00 2.49E-01 8.65E-01 2.06E-01 9.21E-01 1.51E-01  
4.65E+00 1.20E+00 3.41E-01 1.28E+00 2.47E-01 8.61E-01 2.05E-01 9.25E-01 1.49E-01  
4.68E+00 1.19E+00 3.37E-01 1.27E+00 2.45E-01 8.60E-01 2.03E-01 9.30E-01 1.50E-01  
4.71E+00 1.18E+00 3.32E-01 1.27E+00 2.44E-01 8.61E-01 2.02E-01 9.34E-01 1.49E-01  
4.74E+00 1.17E+00 3.29E-01 1.26E+00 2.41E-01 8.58E-01 2.02E-01 9.40E-01 1.48E-01  
4.77E+00 1.15E+00 3.24E-01 1.24E+00 2.39E-01 8.61E-01 2.00E-01 9.44E-01 1.48E-01  
4.80E+00 1.14E+00 3.20E-01 1.23E+00 2.38E-01 8.63E-01 1.99E-01 9.52E-01 1.49E-01  
4.83E+00 1.13E+00 3.15E-01 1.22E+00 2.34E-01 8.64E-01 1.98E-01 9.56E-01 1.48E-01  
4.86E+00 1.11E+00 3.12E-01 1.21E+00 2.32E-01 8.67E-01 1.98E-01 9.62E-01 1.46E-01  
4.89E+00 1.09E+00 3.10E-01 1.19E+00 2.30E-01 8.71E-01 1.97E-01 9.66E-01 1.47E-01  
4.92E+00 1.08E+00 3.07E-01 1.18E+00 2.26E-01 8.78E-01 1.96E-01 9.72E-01 1.46E-01  
4.95E+00 1.06E+00 3.01E-01 1.16E+00 2.24E-01 8.81E-01 1.96E-01 9.75E-01 1.46E-01  
4.98E+00 1.05E+00 2.99E-01 1.15E+00 2.24E-01 8.87E-01 1.96E-01 9.79E-01 1.44E-01

5.01E+00 1.03E+00 2.95E-01 1.13E+00 2.19E-01 8.92E-01 1.94E-01 9.82E-01 1.45E-01  
5.04E+00 1.02E+00 2.91E-01 1.12E+00 2.18E-01 8.97E-01 1.94E-01 9.84E-01 1.43E-01  
5.07E+00 1.01E+00 2.87E-01 1.11E+00 2.16E-01 9.04E-01 1.93E-01 9.85E-01 1.43E-01  
5.10E+00 9.92E-01 2.83E-01 1.10E+00 2.12E-01 9.13E-01 1.93E-01 9.88E-01 1.43E-01  
5.13E+00 9.84E-01 2.81E-01 1.08E+00 2.09E-01 9.22E-01 1.93E-01 9.87E-01 1.42E-01  
5.16E+00 9.73E-01 2.77E-01 1.07E+00 2.09E-01 9.28E-01 1.92E-01 9.90E-01 1.41E-01  
5.19E+00 9.66E-01 2.73E-01 1.06E+00 2.05E-01 9.36E-01 1.93E-01 9.90E-01 1.41E-01  
5.22E+00 9.52E-01 2.71E-01 1.05E+00 2.02E-01 9.47E-01 1.92E-01 9.92E-01 1.40E-01  
5.25E+00 9.42E-01 2.68E-01 1.04E+00 2.01E-01 9.58E-01 1.93E-01 9.91E-01 1.38E-01  
5.28E+00 9.31E-01 2.65E-01 1.03E+00 1.98E-01 9.66E-01 1.92E-01 9.93E-01 1.38E-01  
5.31E+00 9.21E-01 2.61E-01 1.03E+00 1.97E-01 9.75E-01 1.93E-01 9.93E-01 1.38E-01  
5.34E+00 9.12E-01 2.60E-01 1.02E+00 1.94E-01 9.87E-01 1.92E-01 9.95E-01 1.36E-01  
5.37E+00 9.04E-01 2.58E-01 1.01E+00 1.93E-01 1.00E+00 1.93E-01 9.96E-01 1.36E-01  
5.40E+00 8.94E-01 2.54E-01 1.01E+00 1.90E-01 1.01E+00 1.93E-01 9.98E-01 1.35E-01  
5.43E+00 8.86E-01 2.52E-01 1.00E+00 1.89E-01 1.02E+00 1.92E-01 9.99E-01 1.34E-01  
5.46E+00 8.81E-01 2.49E-01 9.97E-01 1.88E-01 1.03E+00 1.92E-01 1.00E+00 1.33E-01  
5.49E+00 8.74E-01 2.47E-01 9.92E-01 1.87E-01 1.05E+00 1.92E-01 1.00E+00 1.33E-01  
5.52E+00 8.66E-01 2.44E-01 9.87E-01 1.84E-01 1.06E+00 1.93E-01 1.00E+00 1.32E-01  
5.55E+00 8.59E-01 2.42E-01 9.84E-01 1.84E-01 1.07E+00 1.93E-01 1.01E+00 1.32E-01  
5.58E+00 8.55E-01 2.41E-01 9.76E-01 1.82E-01 1.08E+00 1.93E-01 1.01E+00 1.31E-01  
5.61E+00 8.53E-01 2.38E-01 9.73E-01 1.80E-01 1.09E+00 1.92E-01 1.01E+00 1.31E-01  
5.64E+00 8.50E-01 2.37E-01 9.69E-01 1.80E-01 1.11E+00 1.92E-01 1.01E+00 1.30E-01  
5.67E+00 8.49E-01 2.37E-01 9.63E-01 1.78E-01 1.11E+00 1.93E-01 1.01E+00 1.28E-01  
5.70E+00 8.47E-01 2.34E-01 9.60E-01 1.77E-01 1.12E+00 1.90E-01 1.02E+00 1.28E-01  
5.73E+00 8.49E-01 2.33E-01 9.54E-01 1.76E-01 1.13E+00 1.91E-01 1.02E+00 1.27E-01  
5.76E+00 8.49E-01 2.32E-01 9.52E-01 1.73E-01 1.14E+00 1.91E-01 1.02E+00 1.27E-01  
5.79E+00 8.50E-01 2.30E-01 9.48E-01 1.72E-01 1.14E+00 1.90E-01 1.02E+00 1.27E-01  
5.82E+00 8.54E-01 2.29E-01 9.43E-01 1.72E-01 1.14E+00 1.89E-01 1.02E+00 1.25E-01  
5.85E+00 8.56E-01 2.30E-01 9.43E-01 1.70E-01 1.15E+00 1.88E-01 1.02E+00 1.25E-01  
5.88E+00 8.60E-01 2.29E-01 9.38E-01 1.69E-01 1.14E+00 1.86E-01 1.02E+00 1.24E-01  
5.91E+00 8.65E-01 2.27E-01 9.34E-01 1.68E-01 1.14E+00 1.85E-01 1.02E+00 1.24E-01  
5.94E+00 8.70E-01 2.26E-01 9.33E-01 1.68E-01 1.14E+00 1.83E-01 1.02E+00 1.23E-01  
5.97E+00 8.72E-01 2.26E-01 9.31E-01 1.67E-01 1.13E+00 1.82E-01 1.02E+00 1.22E-01  
6.00E+00 8.80E-01 2.27E-01 9.28E-01 1.65E-01 1.12E+00 1.80E-01 1.03E+00 1.23E-01  
6.03E+00 8.85E-01 2.26E-01 9.25E-01 1.64E-01 1.11E+00 1.79E-01 1.03E+00 1.22E-01  
6.06E+00 8.93E-01 2.25E-01 9.24E-01 1.62E-01 1.11E+00 1.78E-01 1.02E+00 1.21E-01  
6.09E+00 8.99E-01 2.25E-01 9.23E-01 1.61E-01 1.10E+00 1.75E-01 1.02E+00 1.20E-01  
6.12E+00 9.06E-01 2.25E-01 9.23E-01 1.60E-01 1.09E+00 1.75E-01 1.02E+00 1.19E-01  
6.15E+00 9.12E-01 2.24E-01 9.19E-01 1.59E-01 1.08E+00 1.73E-01 1.02E+00 1.19E-01  
6.18E+00 9.23E-01 2.24E-01 9.20E-01 1.59E-01 1.07E+00 1.70E-01 1.02E+00 1.18E-01  
6.21E+00 9.28E-01 2.24E-01 9.20E-01 1.58E-01 1.06E+00 1.69E-01 1.02E+00 1.17E-01  
6.24E+00 9.37E-01 2.24E-01 9.21E-01 1.56E-01 1.05E+00 1.68E-01 1.02E+00 1.17E-01

6.27E+00 9.44E-01 2.24E-01 9.21E-01 1.55E-01 1.04E+00 1.66E-01 1.02E+00 1.16E-01  
6.30E+00 9.52E-01 2.24E-01 9.21E-01 1.56E-01 1.03E+00 1.65E-01 1.02E+00 1.15E-01  
6.33E+00 9.60E-01 2.23E-01 9.23E-01 1.56E-01 1.02E+00 1.63E-01 1.02E+00 1.15E-01  
6.36E+00 9.70E-01 2.23E-01 9.25E-01 1.55E-01 1.01E+00 1.62E-01 1.02E+00 1.14E-01  
6.39E+00 9.74E-01 2.23E-01 9.27E-01 1.54E-01 1.01E+00 1.62E-01 1.01E+00 1.14E-01  
6.42E+00 9.84E-01 2.23E-01 9.27E-01 1.54E-01 9.98E-01 1.60E-01 1.01E+00 1.14E-01  
6.45E+00 9.90E-01 2.22E-01 9.30E-01 1.53E-01 9.93E-01 1.59E-01 1.01E+00 1.13E-01  
6.48E+00 9.94E-01 2.23E-01 9.32E-01 1.53E-01 9.86E-01 1.58E-01 1.01E+00 1.13E-01  
6.51E+00 1.00E+00 2.22E-01 9.34E-01 1.52E-01 9.80E-01 1.57E-01 1.01E+00 1.11E-01  
6.54E+00 1.01E+00 2.22E-01 9.39E-01 1.52E-01 9.78E-01 1.56E-01 1.01E+00 1.11E-01  
6.57E+00 1.02E+00 2.21E-01 9.42E-01 1.52E-01 9.71E-01 1.55E-01 1.00E+00 1.10E-01  
6.60E+00 1.02E+00 2.20E-01 9.46E-01 1.51E-01 9.68E-01 1.53E-01 1.00E+00 1.10E-01  
6.63E+00 1.02E+00 2.22E-01 9.50E-01 1.51E-01 9.65E-01 1.53E-01 9.99E-01 1.09E-01  
6.66E+00 1.03E+00 2.19E-01 9.53E-01 1.50E-01 9.61E-01 1.52E-01 9.97E-01 1.09E-01  
6.69E+00 1.03E+00 2.19E-01 9.57E-01 1.50E-01 9.57E-01 1.51E-01 9.94E-01 1.08E-01  
6.72E+00 1.03E+00 2.19E-01 9.61E-01 1.50E-01 9.54E-01 1.49E-01 9.92E-01 1.08E-01  
6.75E+00 1.04E+00 2.19E-01 9.65E-01 1.49E-01 9.53E-01 1.48E-01 9.91E-01 1.07E-01  
6.78E+00 1.04E+00 2.17E-01 9.68E-01 1.48E-01 9.50E-01 1.48E-01 9.89E-01 1.06E-01  
6.81E+00 1.04E+00 2.16E-01 9.74E-01 1.49E-01 9.47E-01 1.48E-01 9.85E-01 1.06E-01  
6.84E+00 1.04E+00 2.16E-01 9.79E-01 1.49E-01 9.45E-01 1.46E-01 9.82E-01 1.05E-01  
6.87E+00 1.04E+00 2.15E-01 9.82E-01 1.48E-01 9.43E-01 1.46E-01 9.81E-01 1.05E-01  
6.90E+00 1.04E+00 2.15E-01 9.86E-01 1.47E-01 9.42E-01 1.44E-01 9.80E-01 1.05E-01  
6.93E+00 1.04E+00 2.13E-01 9.91E-01 1.47E-01 9.40E-01 1.44E-01 9.78E-01 1.03E-01  
6.96E+00 1.04E+00 2.12E-01 9.93E-01 1.47E-01 9.40E-01 1.43E-01 9.76E-01 1.03E-01  
6.99E+00 1.04E+00 2.11E-01 9.97E-01 1.48E-01 9.38E-01 1.43E-01 9.75E-01 1.03E-01  
7.02E+00 1.04E+00 2.10E-01 1.00E+00 1.46E-01 9.38E-01 1.41E-01 9.74E-01 1.02E-01  
7.05E+00 1.04E+00 2.08E-01 1.00E+00 1.46E-01 9.38E-01 1.40E-01 9.73E-01 1.02E-01  
7.08E+00 1.04E+00 2.08E-01 1.01E+00 1.46E-01 9.37E-01 1.41E-01 9.72E-01 1.01E-01  
7.11E+00 1.04E+00 2.07E-01 1.01E+00 1.45E-01 9.39E-01 1.40E-01 9.71E-01 1.01E-01  
7.14E+00 1.03E+00 2.05E-01 1.01E+00 1.45E-01 9.40E-01 1.39E-01 9.71E-01 1.00E-01  
7.17E+00 1.03E+00 2.05E-01 1.02E+00 1.44E-01 9.40E-01 1.39E-01 9.70E-01 9.95E-02  
7.20E+00 1.03E+00 2.03E-01 1.02E+00 1.44E-01 9.42E-01 1.37E-01 9.71E-01 9.99E-02  
7.23E+00 1.03E+00 2.03E-01 1.02E+00 1.43E-01 9.42E-01 1.38E-01 9.71E-01 9.88E-02  
7.26E+00 1.03E+00 2.02E-01 1.02E+00 1.43E-01 9.46E-01 1.37E-01 9.71E-01 9.80E-02  
7.29E+00 1.03E+00 2.00E-01 1.03E+00 1.42E-01 9.47E-01 1.36E-01 9.71E-01 9.78E-02  
7.32E+00 1.03E+00 2.01E-01 1.03E+00 1.42E-01 9.49E-01 1.36E-01 9.71E-01 9.76E-02  
7.35E+00 1.02E+00 1.99E-01 1.03E+00 1.42E-01 9.51E-01 1.35E-01 9.72E-01 9.74E-02  
7.38E+00 1.03E+00 1.98E-01 1.03E+00 1.40E-01 9.54E-01 1.35E-01 9.73E-01 9.64E-02  
7.41E+00 1.02E+00 1.98E-01 1.03E+00 1.40E-01 9.56E-01 1.34E-01 9.73E-01 9.64E-02  
7.44E+00 1.02E+00 1.97E-01 1.03E+00 1.40E-01 9.60E-01 1.34E-01 9.74E-01 9.61E-02  
7.47E+00 1.02E+00 1.96E-01 1.03E+00 1.39E-01 9.62E-01 1.34E-01 9.76E-01 9.60E-02  
7.50E+00 1.02E+00 1.95E-01 1.03E+00 1.39E-01 9.64E-01 1.34E-01 9.76E-01 9.52E-02



7.53E+00 1.02E+00 1.92E-01 1.03E+00 1.38E-01 9.69E-01 1.34E-01 9.78E-01 9.54E-02  
7.56E+00 1.01E+00 1.92E-01 1.03E+00 1.37E-01 9.73E-01 1.33E-01 9.79E-01 9.52E-02  
7.59E+00 1.01E+00 1.92E-01 1.03E+00 1.37E-01 9.75E-01 1.32E-01 9.80E-01 9.40E-02  
7.62E+00 1.01E+00 1.90E-01 1.03E+00 1.36E-01 9.79E-01 1.34E-01 9.81E-01 9.36E-02  
7.65E+00 1.01E+00 1.89E-01 1.03E+00 1.35E-01 9.83E-01 1.32E-01 9.84E-01 9.35E-02  
7.68E+00 1.01E+00 1.88E-01 1.03E+00 1.35E-01 9.86E-01 1.32E-01 9.84E-01 9.34E-02  
7.71E+00 1.00E+00 1.89E-01 1.03E+00 1.35E-01 9.90E-01 1.32E-01 9.86E-01 9.32E-02  
7.74E+00 1.00E+00 1.87E-01 1.03E+00 1.34E-01 9.93E-01 1.32E-01 9.87E-01 9.27E-02  
7.77E+00 1.00E+00 1.85E-01 1.03E+00 1.34E-01 9.99E-01 1.32E-01 9.88E-01 9.27E-02  
7.80E+00 9.98E-01 1.85E-01 1.03E+00 1.33E-01 1.00E+00 1.32E-01 9.90E-01 9.23E-02  
7.83E+00 9.98E-01 1.84E-01 1.03E+00 1.32E-01 1.01E+00 1.32E-01 9.92E-01 9.21E-02  
7.86E+00 9.97E-01 1.84E-01 1.03E+00 1.31E-01 1.01E+00 1.32E-01 9.93E-01 9.15E-02  
7.89E+00 9.94E-01 1.82E-01 1.03E+00 1.32E-01 1.01E+00 1.30E-01 9.96E-01 9.13E-02  
7.92E+00 9.96E-01 1.84E-01 1.02E+00 1.31E-01 1.01E+00 1.30E-01 9.97E-01 9.07E-02  
7.95E+00 9.95E-01 1.82E-01 1.02E+00 1.30E-01 1.02E+00 1.29E-01 9.99E-01 9.07E-02  
7.98E+00 9.93E-01 1.81E-01 1.02E+00 1.29E-01 1.02E+00 1.29E-01 1.00E+00 9.06E-02  
8.01E+00 9.93E-01 1.80E-01 1.02E+00 1.28E-01 1.02E+00 1.29E-01 1.00E+00 8.99E-02  
8.04E+00 9.92E-01 1.80E-01 1.02E+00 1.28E-01 1.03E+00 1.29E-01 1.00E+00 9.08E-02  
8.07E+00 9.89E-01 1.78E-01 1.02E+00 1.27E-01 1.03E+00 1.28E-01 1.01E+00 8.99E-02  
8.10E+00 9.88E-01 1.78E-01 1.02E+00 1.28E-01 1.03E+00 1.29E-01 1.01E+00 8.97E-02  
8.13E+00 9.89E-01 1.77E-01 1.02E+00 1.27E-01 1.03E+00 1.28E-01 1.01E+00 8.95E-02  
8.16E+00 9.87E-01 1.75E-01 1.02E+00 1.27E-01 1.03E+00 1.26E-01 1.01E+00 8.92E-02  
8.19E+00 9.87E-01 1.75E-01 1.01E+00 1.26E-01 1.04E+00 1.27E-01 1.01E+00 8.86E-02  
8.22E+00 9.87E-01 1.75E-01 1.01E+00 1.25E-01 1.04E+00 1.27E-01 1.01E+00 8.83E-02  
8.25E+00 9.88E-01 1.74E-01 1.01E+00 1.25E-01 1.04E+00 1.27E-01 1.01E+00 8.83E-02  
8.28E+00 9.87E-01 1.74E-01 1.01E+00 1.24E-01 1.04E+00 1.25E-01 1.02E+00 8.85E-02  
8.31E+00 9.86E-01 1.74E-01 1.01E+00 1.24E-01 1.04E+00 1.25E-01 1.02E+00 8.75E-02  
8.34E+00 9.88E-01 1.72E-01 1.01E+00 1.23E-01 1.04E+00 1.26E-01 1.02E+00 8.73E-02  
8.37E+00 9.87E-01 1.71E-01 1.01E+00 1.22E-01 1.04E+00 1.24E-01 1.02E+00 8.71E-02  
8.40E+00 9.88E-01 1.71E-01 1.01E+00 1.22E-01 1.04E+00 1.24E-01 1.02E+00 8.69E-02  
8.43E+00 9.89E-01 1.71E-01 1.00E+00 1.22E-01 1.04E+00 1.23E-01 1.02E+00 8.66E-02  
8.46E+00 9.89E-01 1.69E-01 1.00E+00 1.22E-01 1.04E+00 1.23E-01 1.02E+00 8.65E-02  
8.49E+00 9.90E-01 1.69E-01 1.00E+00 1.20E-01 1.04E+00 1.23E-01 1.02E+00 8.59E-02  
8.52E+00 9.90E-01 1.69E-01 1.00E+00 1.20E-01 1.04E+00 1.22E-01 1.02E+00 8.62E-02  
8.55E+00 9.91E-01 1.69E-01 9.99E-01 1.20E-01 1.04E+00 1.21E-01 1.02E+00 8.51E-02  
8.58E+00 9.92E-01 1.68E-01 9.97E-01 1.20E-01 1.03E+00 1.22E-01 1.02E+00 8.55E-02  
8.61E+00 9.91E-01 1.68E-01 9.95E-01 1.19E-01 1.03E+00 1.20E-01 1.02E+00 8.46E-02  
8.64E+00 9.91E-01 1.67E-01 9.96E-01 1.18E-01 1.03E+00 1.20E-01 1.02E+00 8.47E-02  
8.67E+00 9.92E-01 1.66E-01 9.94E-01 1.18E-01 1.03E+00 1.19E-01 1.02E+00 8.42E-02  
8.70E+00 9.94E-01 1.66E-01 9.92E-01 1.17E-01 1.03E+00 1.19E-01 1.02E+00 8.41E-02  
8.73E+00 9.93E-01 1.65E-01 9.90E-01 1.17E-01 1.02E+00 1.19E-01 1.02E+00 8.41E-02  
8.76E+00 9.95E-01 1.65E-01 9.89E-01 1.16E-01 1.02E+00 1.17E-01 1.02E+00 8.33E-02

8.79E+00 9.95E-01 1.64E-01 9.89E-01 1.15E-01 1.02E+00 1.17E-01 1.02E+00 8.32E-02  
8.82E+00 9.94E-01 1.63E-01 9.87E-01 1.15E-01 1.02E+00 1.18E-01 1.02E+00 8.25E-02  
8.85E+00 9.97E-01 1.64E-01 9.87E-01 1.15E-01 1.02E+00 1.17E-01 1.02E+00 8.25E-02  
8.88E+00 9.97E-01 1.62E-01 9.85E-01 1.14E-01 1.01E+00 1.16E-01 1.02E+00 8.19E-02  
8.91E+00 9.97E-01 1.62E-01 9.86E-01 1.14E-01 1.01E+00 1.15E-01 1.01E+00 8.19E-02  
8.94E+00 9.98E-01 1.62E-01 9.84E-01 1.14E-01 1.01E+00 1.14E-01 1.01E+00 8.16E-02  
8.97E+00 9.99E-01 1.61E-01 9.83E-01 1.13E-01 1.01E+00 1.14E-01 1.01E+00 8.14E-02  
9.00E+00 1.00E+00 1.60E-01 9.83E-01 1.13E-01 1.01E+00 1.14E-01 1.01E+00 8.05E-02  
9.03E+00 1.00E+00 1.60E-01 9.82E-01 1.12E-01 1.00E+00 1.13E-01 1.01E+00 8.01E-02  
9.06E+00 9.99E-01 1.59E-01 9.83E-01 1.12E-01 1.00E+00 1.13E-01 1.01E+00 8.06E-02  
9.09E+00 9.99E-01 1.60E-01 9.81E-01 1.11E-01 9.99E-01 1.13E-01 1.01E+00 8.00E-02  
9.12E+00 9.99E-01 1.58E-01 9.81E-01 1.11E-01 9.99E-01 1.12E-01 1.01E+00 7.98E-02  
9.15E+00 1.00E+00 1.58E-01 9.81E-01 1.11E-01 9.95E-01 1.11E-01 1.01E+00 7.95E-02  
9.18E+00 9.98E-01 1.57E-01 9.81E-01 1.10E-01 9.93E-01 1.11E-01 1.01E+00 7.90E-02  
9.21E+00 9.99E-01 1.57E-01 9.80E-01 1.10E-01 9.93E-01 1.12E-01 1.00E+00 7.85E-02  
9.24E+00 9.99E-01 1.56E-01 9.81E-01 1.09E-01 9.90E-01 1.09E-01 1.00E+00 7.90E-02  
9.27E+00 1.00E+00 1.55E-01 9.80E-01 1.09E-01 9.89E-01 1.10E-01 1.00E+00 7.82E-02  
9.30E+00 9.98E-01 1.55E-01 9.80E-01 1.09E-01 9.89E-01 1.09E-01 1.00E+00 7.78E-02  
9.33E+00 9.98E-01 1.55E-01 9.79E-01 1.09E-01 9.88E-01 1.09E-01 1.00E+00 7.73E-02  
9.36E+00 9.99E-01 1.55E-01 9.81E-01 1.09E-01 9.87E-01 1.09E-01 1.00E+00 7.70E-02  
9.39E+00 9.98E-01 1.54E-01 9.81E-01 1.08E-01 9.86E-01 1.08E-01 9.99E-01 7.68E-02  
9.42E+00 9.98E-01 1.54E-01 9.82E-01 1.08E-01 9.85E-01 1.08E-01 9.99E-01 7.65E-02  
9.45E+00 9.98E-01 1.53E-01 9.82E-01 1.07E-01 9.83E-01 1.07E-01 9.97E-01 7.64E-02  
9.48E+00 9.98E-01 1.52E-01 9.83E-01 1.07E-01 9.82E-01 1.07E-01 9.96E-01 7.61E-02  
9.51E+00 9.96E-01 1.51E-01 9.84E-01 1.07E-01 9.82E-01 1.07E-01 9.96E-01 7.62E-02  
9.54E+00 9.98E-01 1.51E-01 9.85E-01 1.07E-01 9.83E-01 1.07E-01 9.95E-01 7.55E-02  
9.57E+00 9.98E-01 1.50E-01 9.85E-01 1.06E-01 9.82E-01 1.06E-01 9.94E-01 7.56E-02  
9.60E+00 9.98E-01 1.51E-01 9.86E-01 1.06E-01 9.81E-01 1.06E-01 9.94E-01 7.57E-02  
9.63E+00 9.99E-01 1.50E-01 9.87E-01 1.05E-01 9.81E-01 1.06E-01 9.93E-01 7.48E-02  
9.66E+00 9.98E-01 1.51E-01 9.87E-01 1.05E-01 9.82E-01 1.05E-01 9.93E-01 7.44E-02  
9.69E+00 9.97E-01 1.49E-01 9.88E-01 1.05E-01 9.82E-01 1.04E-01 9.92E-01 7.44E-02  
9.72E+00 9.99E-01 1.48E-01 9.89E-01 1.05E-01 9.82E-01 1.04E-01 9.92E-01 7.38E-02  
9.75E+00 9.98E-01 1.49E-01 9.91E-01 1.04E-01 9.82E-01 1.03E-01 9.91E-01 7.37E-02  
9.78E+00 9.97E-01 1.48E-01 9.93E-01 1.04E-01 9.83E-01 1.04E-01 9.91E-01 7.37E-02  
9.81E+00 9.98E-01 1.47E-01 9.93E-01 1.04E-01 9.83E-01 1.03E-01 9.90E-01 7.34E-02  
9.84E+00 9.96E-01 1.47E-01 9.94E-01 1.04E-01 9.82E-01 1.04E-01 9.90E-01 7.33E-02  
9.87E+00 9.98E-01 1.46E-01 9.95E-01 1.03E-01 9.85E-01 1.02E-01 9.90E-01 7.29E-02  
9.90E+00 9.97E-01 1.46E-01 9.96E-01 1.03E-01 9.85E-01 1.03E-01 9.91E-01 7.28E-02  
9.93E+00 9.97E-01 1.46E-01 9.96E-01 1.03E-01 9.85E-01 1.03E-01 9.90E-01 7.24E-02  
9.96E+00 9.97E-01 1.45E-01 9.99E-01 1.02E-01 9.87E-01 1.02E-01 9.90E-01 7.23E-02  
9.99E+00 9.96E-01 1.44E-01 1.00E+00 1.03E-01 9.88E-01 1.02E-01 9.90E-01 7.24E-02  
1.00E+01 9.96E-01 1.44E-01 1.00E+00 1.02E-01 9.89E-01 1.02E-01 9.91E-01 7.17E-02

2 m MgCl<sub>2</sub>-Water  $g(r)$  at 2 GPa 500 K; distance  $r$ ,  $g(r)$  and errors

| $r$      | Mg-Ow    | Cl-Ow    |
|----------|----------|----------|
| 0.00E+00 | 0.00E+00 | 0.00E+00 |
| 7.50E-03 | 0.00E+00 | 0.00E+00 |
| 3.00E-02 | 0.00E+00 | 0.00E+00 |
| 6.00E-02 | 0.00E+00 | 0.00E+00 |
| 9.00E-02 | 0.00E+00 | 0.00E+00 |
| 1.20E-01 | 0.00E+00 | 0.00E+00 |
| 1.50E-01 | 0.00E+00 | 0.00E+00 |
| 1.80E-01 | 0.00E+00 | 0.00E+00 |
| 2.10E-01 | 0.00E+00 | 0.00E+00 |
| 2.40E-01 | 0.00E+00 | 0.00E+00 |
| 2.70E-01 | 0.00E+00 | 0.00E+00 |
| 3.00E-01 | 0.00E+00 | 0.00E+00 |
| 3.30E-01 | 0.00E+00 | 0.00E+00 |
| 3.60E-01 | 0.00E+00 | 0.00E+00 |
| 3.90E-01 | 0.00E+00 | 0.00E+00 |
| 4.20E-01 | 0.00E+00 | 0.00E+00 |
| 4.50E-01 | 0.00E+00 | 0.00E+00 |
| 4.80E-01 | 0.00E+00 | 0.00E+00 |
| 5.10E-01 | 0.00E+00 | 0.00E+00 |
| 5.40E-01 | 0.00E+00 | 0.00E+00 |
| 5.70E-01 | 0.00E+00 | 0.00E+00 |
| 6.00E-01 | 0.00E+00 | 0.00E+00 |
| 6.30E-01 | 0.00E+00 | 0.00E+00 |
| 6.60E-01 | 0.00E+00 | 0.00E+00 |
| 6.90E-01 | 0.00E+00 | 0.00E+00 |
| 7.20E-01 | 0.00E+00 | 0.00E+00 |
| 7.50E-01 | 0.00E+00 | 0.00E+00 |
| 7.80E-01 | 0.00E+00 | 0.00E+00 |
| 8.10E-01 | 0.00E+00 | 0.00E+00 |
| 8.40E-01 | 0.00E+00 | 0.00E+00 |
| 8.70E-01 | 0.00E+00 | 0.00E+00 |
| 9.00E-01 | 0.00E+00 | 0.00E+00 |
| 9.30E-01 | 0.00E+00 | 0.00E+00 |
| 9.60E-01 | 0.00E+00 | 0.00E+00 |
| 9.90E-01 | 0.00E+00 | 0.00E+00 |
| 1.02E+00 | 0.00E+00 | 0.00E+00 |
| 1.05E+00 | 0.00E+00 | 0.00E+00 |
| 1.08E+00 | 0.00E+00 | 0.00E+00 |
| 1.11E+00 | 0.00E+00 | 0.00E+00 |

---

1.14E+00 0.00E+00 0.00E+00 0.00E+00 0.00E+00  
1.17E+00 0.00E+00 0.00E+00 0.00E+00 0.00E+00  
1.20E+00 0.00E+00 0.00E+00 0.00E+00 0.00E+00  
1.23E+00 0.00E+00 0.00E+00 0.00E+00 0.00E+00  
1.26E+00 0.00E+00 0.00E+00 0.00E+00 0.00E+00  
1.29E+00 0.00E+00 0.00E+00 0.00E+00 0.00E+00  
1.32E+00 0.00E+00 0.00E+00 0.00E+00 0.00E+00  
1.35E+00 0.00E+00 0.00E+00 0.00E+00 0.00E+00  
1.38E+00 0.00E+00 0.00E+00 0.00E+00 0.00E+00  
1.41E+00 0.00E+00 0.00E+00 0.00E+00 0.00E+00  
1.44E+00 0.00E+00 0.00E+00 0.00E+00 0.00E+00  
1.47E+00 0.00E+00 0.00E+00 0.00E+00 0.00E+00  
1.50E+00 0.00E+00 0.00E+00 0.00E+00 0.00E+00  
1.53E+00 0.00E+00 0.00E+00 0.00E+00 0.00E+00  
1.56E+00 0.00E+00 0.00E+00 0.00E+00 0.00E+00  
1.59E+00 0.00E+00 0.00E+00 0.00E+00 0.00E+00  
1.62E+00 0.00E+00 0.00E+00 0.00E+00 0.00E+00  
1.65E+00 2.40E-04 1.18E-02 0.00E+00 0.00E+00  
1.68E+00 7.66E-04 2.02E-02 0.00E+00 0.00E+00  
1.71E+00 8.89E-03 6.92E-02 0.00E+00 0.00E+00  
1.74E+00 7.45E-02 1.98E-01 0.00E+00 0.00E+00  
1.77E+00 4.52E-01 4.73E-01 0.00E+00 0.00E+00  
1.80E+00 1.78E+00 9.04E-01 0.00E+00 0.00E+00  
1.83E+00 4.49E+00 1.35E+00 0.00E+00 0.00E+00  
1.86E+00 8.04E+00 1.74E+00 0.00E+00 0.00E+00  
1.89E+00 1.10E+01 1.99E+00 0.00E+00 0.00E+00  
1.92E+00 1.21E+01 2.09E+00 0.00E+00 0.00E+00  
1.95E+00 1.13E+01 2.03E+00 0.00E+00 0.00E+00  
1.98E+00 9.51E+00 1.84E+00 0.00E+00 0.00E+00  
2.01E+00 7.31E+00 1.60E+00 0.00E+00 0.00E+00  
2.04E+00 5.31E+00 1.32E+00 0.00E+00 0.00E+00  
2.07E+00 3.66E+00 1.11E+00 0.00E+00 0.00E+00  
2.10E+00 2.49E+00 8.95E-01 0.00E+00 0.00E+00  
2.13E+00 1.68E+00 7.36E-01 0.00E+00 0.00E+00  
2.16E+00 1.12E+00 5.96E-01 0.00E+00 0.00E+00  
2.19E+00 7.55E-01 4.78E-01 0.00E+00 0.00E+00  
2.22E+00 5.11E-01 3.95E-01 0.00E+00 0.00E+00  
2.25E+00 3.57E-01 3.30E-01 0.00E+00 0.00E+00  
2.28E+00 2.45E-01 2.67E-01 0.00E+00 0.00E+00  
2.31E+00 1.78E-01 2.27E-01 0.00E+00 0.00E+00  
2.34E+00 1.31E-01 1.94E-01 0.00E+00 0.00E+00  
2.37E+00 9.71E-02 1.66E-01 0.00E+00 0.00E+00

---

2.40E+00 7.31E-02 1.40E-01 0.00E+00 0.00E+00  
2.43E+00 5.95E-02 1.24E-01 0.00E+00 0.00E+00  
2.46E+00 4.58E-02 1.08E-01 0.00E+00 0.00E+00  
2.49E+00 3.80E-02 9.82E-02 0.00E+00 0.00E+00  
2.52E+00 3.27E-02 9.09E-02 0.00E+00 0.00E+00  
2.55E+00 2.82E-02 8.26E-02 0.00E+00 0.00E+00  
2.58E+00 2.22E-02 7.26E-02 0.00E+00 0.00E+00  
2.61E+00 2.25E-02 7.27E-02 0.00E+00 0.00E+00  
2.64E+00 1.86E-02 6.56E-02 0.00E+00 0.00E+00  
2.67E+00 1.63E-02 6.09E-02 4.61E-05 2.26E-03  
2.70E+00 1.62E-02 6.01E-02 2.06E-04 4.72E-03  
2.73E+00 1.57E-02 5.90E-02 1.47E-03 1.23E-02  
2.76E+00 1.39E-02 5.38E-02 8.01E-03 2.84E-02  
2.79E+00 1.37E-02 5.36E-02 2.98E-02 5.46E-02  
2.82E+00 1.46E-02 5.50E-02 9.14E-02 9.41E-02  
2.85E+00 1.31E-02 5.08E-02 2.29E-01 1.49E-01  
2.88E+00 1.36E-02 5.32E-02 4.77E-01 2.07E-01  
2.91E+00 1.37E-02 5.16E-02 8.54E-01 2.77E-01  
2.94E+00 1.38E-02 5.14E-02 1.35E+00 3.43E-01  
2.97E+00 1.59E-02 5.58E-02 1.91E+00 4.01E-01  
3.00E+00 1.66E-02 5.63E-02 2.47E+00 4.46E-01  
3.03E+00 1.77E-02 5.83E-02 2.96E+00 4.85E-01  
3.06E+00 1.95E-02 5.87E-02 3.35E+00 5.12E-01  
3.09E+00 2.12E-02 6.02E-02 3.57E+00 5.16E-01  
3.12E+00 2.45E-02 6.52E-02 3.67E+00 5.23E-01  
3.15E+00 2.89E-02 6.97E-02 3.60E+00 5.15E-01  
3.18E+00 3.37E-02 7.35E-02 3.48E+00 4.97E-01  
3.21E+00 4.30E-02 8.40E-02 3.29E+00 4.82E-01  
3.24E+00 5.45E-02 9.38E-02 3.07E+00 4.65E-01  
3.27E+00 6.82E-02 1.03E-01 2.86E+00 4.47E-01  
3.30E+00 8.79E-02 1.14E-01 2.64E+00 4.24E-01  
3.33E+00 1.13E-01 1.27E-01 2.43E+00 4.06E-01  
3.36E+00 1.42E-01 1.42E-01 2.26E+00 3.88E-01  
3.39E+00 1.81E-01 1.58E-01 2.10E+00 3.72E-01  
3.42E+00 2.32E-01 1.77E-01 1.96E+00 3.56E-01  
3.45E+00 2.85E-01 1.95E-01 1.83E+00 3.38E-01  
3.48E+00 3.43E-01 2.12E-01 1.72E+00 3.24E-01  
3.51E+00 4.21E-01 2.29E-01 1.62E+00 3.14E-01  
3.54E+00 5.01E-01 2.44E-01 1.52E+00 3.05E-01  
3.57E+00 5.98E-01 2.67E-01 1.44E+00 2.94E-01  
3.60E+00 6.90E-01 2.85E-01 1.36E+00 2.80E-01  
3.63E+00 7.89E-01 2.99E-01 1.28E+00 2.70E-01

3.66E+00 8.95E-01 3.14E-01 1.21E+00 2.62E-01  
3.69E+00 1.00E+00 3.31E-01 1.15E+00 2.52E-01  
3.72E+00 1.10E+00 3.43E-01 1.10E+00 2.45E-01  
3.75E+00 1.20E+00 3.57E-01 1.04E+00 2.34E-01  
3.78E+00 1.29E+00 3.65E-01 9.84E-01 2.28E-01  
3.81E+00 1.37E+00 3.72E-01 9.42E-01 2.19E-01  
3.84E+00 1.45E+00 3.82E-01 8.94E-01 2.15E-01  
3.87E+00 1.51E+00 3.87E-01 8.56E-01 2.06E-01  
3.90E+00 1.56E+00 3.93E-01 8.19E-01 2.03E-01  
3.93E+00 1.61E+00 3.90E-01 7.90E-01 1.96E-01  
3.96E+00 1.64E+00 3.99E-01 7.61E-01 1.93E-01  
3.99E+00 1.67E+00 3.97E-01 7.37E-01 1.87E-01  
4.02E+00 1.67E+00 3.94E-01 7.15E-01 1.83E-01  
4.05E+00 1.68E+00 3.95E-01 6.90E-01 1.78E-01  
4.08E+00 1.68E+00 3.82E-01 6.76E-01 1.75E-01  
4.11E+00 1.66E+00 3.83E-01 6.59E-01 1.71E-01  
4.14E+00 1.65E+00 3.81E-01 6.55E-01 1.69E-01  
4.17E+00 1.64E+00 3.76E-01 6.45E-01 1.69E-01  
4.20E+00 1.62E+00 3.68E-01 6.46E-01 1.65E-01  
4.23E+00 1.60E+00 3.67E-01 6.46E-01 1.64E-01  
4.26E+00 1.58E+00 3.60E-01 6.45E-01 1.64E-01  
4.29E+00 1.55E+00 3.57E-01 6.49E-01 1.63E-01  
4.32E+00 1.52E+00 3.50E-01 6.48E-01 1.63E-01  
4.35E+00 1.50E+00 3.43E-01 6.44E-01 1.60E-01  
4.38E+00 1.48E+00 3.40E-01 6.44E-01 1.60E-01  
4.41E+00 1.45E+00 3.36E-01 6.36E-01 1.56E-01  
4.44E+00 1.42E+00 3.28E-01 6.32E-01 1.57E-01  
4.47E+00 1.39E+00 3.18E-01 6.27E-01 1.53E-01  
4.50E+00 1.36E+00 3.17E-01 6.21E-01 1.52E-01  
4.53E+00 1.32E+00 3.10E-01 6.17E-01 1.53E-01  
4.56E+00 1.29E+00 3.07E-01 6.15E-01 1.51E-01  
4.59E+00 1.26E+00 2.98E-01 6.17E-01 1.50E-01  
4.62E+00 1.22E+00 2.94E-01 6.18E-01 1.49E-01  
4.65E+00 1.18E+00 2.89E-01 6.24E-01 1.49E-01  
4.68E+00 1.14E+00 2.79E-01 6.27E-01 1.49E-01  
4.71E+00 1.10E+00 2.73E-01 6.37E-01 1.48E-01  
4.74E+00 1.06E+00 2.62E-01 6.48E-01 1.50E-01  
4.77E+00 1.03E+00 2.63E-01 6.59E-01 1.49E-01  
4.80E+00 9.91E-01 2.54E-01 6.71E-01 1.47E-01  
4.83E+00 9.54E-01 2.51E-01 6.89E-01 1.49E-01  
4.86E+00 9.28E-01 2.45E-01 7.05E-01 1.49E-01  
4.89E+00 9.02E-01 2.39E-01 7.23E-01 1.51E-01

---

4.92E+00 8.71E-01 2.33E-01 7.43E-01 1.51E-01  
4.95E+00 8.52E-01 2.31E-01 7.66E-01 1.53E-01  
4.98E+00 8.33E-01 2.24E-01 7.92E-01 1.56E-01  
5.01E+00 8.18E-01 2.20E-01 8.11E-01 1.54E-01  
5.04E+00 8.00E-01 2.20E-01 8.37E-01 1.57E-01  
5.07E+00 7.82E-01 2.14E-01 8.58E-01 1.57E-01  
5.10E+00 7.73E-01 2.11E-01 8.88E-01 1.60E-01  
5.13E+00 7.60E-01 2.08E-01 9.14E-01 1.61E-01  
5.16E+00 7.53E-01 2.06E-01 9.44E-01 1.62E-01  
5.19E+00 7.46E-01 2.03E-01 9.71E-01 1.64E-01  
5.22E+00 7.39E-01 2.00E-01 9.99E-01 1.66E-01  
5.25E+00 7.37E-01 2.01E-01 1.03E+00 1.69E-01  
5.28E+00 7.33E-01 1.97E-01 1.06E+00 1.70E-01  
5.31E+00 7.29E-01 1.96E-01 1.08E+00 1.72E-01  
5.34E+00 7.31E-01 1.96E-01 1.11E+00 1.70E-01  
5.37E+00 7.30E-01 1.96E-01 1.14E+00 1.72E-01  
5.40E+00 7.33E-01 1.95E-01 1.17E+00 1.74E-01  
5.43E+00 7.34E-01 1.92E-01 1.20E+00 1.74E-01  
5.46E+00 7.36E-01 1.94E-01 1.22E+00 1.76E-01  
5.49E+00 7.36E-01 1.90E-01 1.25E+00 1.75E-01  
5.52E+00 7.42E-01 1.92E-01 1.27E+00 1.76E-01  
5.55E+00 7.46E-01 1.90E-01 1.29E+00 1.78E-01  
5.58E+00 7.51E-01 1.89E-01 1.31E+00 1.78E-01  
5.61E+00 7.53E-01 1.88E-01 1.32E+00 1.79E-01  
5.64E+00 7.63E-01 1.89E-01 1.33E+00 1.77E-01  
5.67E+00 7.66E-01 1.90E-01 1.34E+00 1.79E-01  
5.70E+00 7.77E-01 1.89E-01 1.34E+00 1.75E-01  
5.73E+00 7.88E-01 1.92E-01 1.34E+00 1.75E-01  
5.76E+00 7.95E-01 1.91E-01 1.33E+00 1.76E-01  
5.79E+00 8.10E-01 1.91E-01 1.32E+00 1.74E-01  
5.82E+00 8.23E-01 1.92E-01 1.31E+00 1.72E-01  
5.85E+00 8.37E-01 1.94E-01 1.29E+00 1.68E-01  
5.88E+00 8.49E-01 1.94E-01 1.27E+00 1.66E-01  
5.91E+00 8.65E-01 1.94E-01 1.26E+00 1.66E-01  
5.94E+00 8.82E-01 1.91E-01 1.24E+00 1.62E-01  
5.97E+00 9.01E-01 1.95E-01 1.21E+00 1.61E-01  
6.00E+00 9.20E-01 1.95E-01 1.20E+00 1.60E-01  
6.03E+00 9.35E-01 1.97E-01 1.18E+00 1.56E-01  
6.06E+00 9.49E-01 1.95E-01 1.15E+00 1.54E-01  
6.09E+00 9.70E-01 1.99E-01 1.13E+00 1.53E-01  
6.12E+00 9.84E-01 1.96E-01 1.11E+00 1.51E-01  
6.15E+00 1.01E+00 2.02E-01 1.10E+00 1.48E-01

6.18E+00 1.02E+00 2.02E-01 1.08E+00 1.44E-01  
6.21E+00 1.03E+00 2.03E-01 1.06E+00 1.43E-01  
6.24E+00 1.05E+00 2.02E-01 1.04E+00 1.42E-01  
6.27E+00 1.07E+00 2.01E-01 1.03E+00 1.38E-01  
6.30E+00 1.08E+00 2.03E-01 1.01E+00 1.39E-01  
6.33E+00 1.09E+00 2.01E-01 9.96E-01 1.37E-01  
6.36E+00 1.10E+00 2.02E-01 9.84E-01 1.34E-01  
6.39E+00 1.12E+00 2.05E-01 9.72E-01 1.34E-01  
6.42E+00 1.13E+00 2.02E-01 9.62E-01 1.32E-01  
6.45E+00 1.13E+00 2.00E-01 9.49E-01 1.30E-01  
6.48E+00 1.14E+00 2.00E-01 9.41E-01 1.30E-01  
6.51E+00 1.14E+00 2.01E-01 9.29E-01 1.28E-01  
6.54E+00 1.15E+00 2.01E-01 9.24E-01 1.29E-01  
6.57E+00 1.15E+00 2.00E-01 9.15E-01 1.27E-01  
6.60E+00 1.15E+00 2.00E-01 9.06E-01 1.24E-01  
6.63E+00 1.15E+00 1.99E-01 9.01E-01 1.25E-01  
6.66E+00 1.15E+00 1.95E-01 8.94E-01 1.24E-01  
6.69E+00 1.15E+00 1.98E-01 8.93E-01 1.24E-01  
6.72E+00 1.15E+00 1.95E-01 8.89E-01 1.22E-01  
6.75E+00 1.15E+00 1.96E-01 8.86E-01 1.22E-01  
6.78E+00 1.14E+00 1.92E-01 8.82E-01 1.21E-01  
6.81E+00 1.13E+00 1.90E-01 8.82E-01 1.20E-01  
6.84E+00 1.14E+00 1.92E-01 8.79E-01 1.19E-01  
6.87E+00 1.13E+00 1.90E-01 8.77E-01 1.18E-01  
6.90E+00 1.12E+00 1.88E-01 8.79E-01 1.18E-01  
6.93E+00 1.12E+00 1.88E-01 8.78E-01 1.18E-01  
6.96E+00 1.11E+00 1.88E-01 8.80E-01 1.17E-01  
6.99E+00 1.11E+00 1.86E-01 8.79E-01 1.16E-01  
7.02E+00 1.10E+00 1.82E-01 8.81E-01 1.16E-01  
7.05E+00 1.10E+00 1.81E-01 8.81E-01 1.16E-01  
7.08E+00 1.09E+00 1.82E-01 8.83E-01 1.16E-01  
7.11E+00 1.08E+00 1.80E-01 8.83E-01 1.15E-01  
7.14E+00 1.08E+00 1.79E-01 8.88E-01 1.16E-01  
7.17E+00 1.07E+00 1.76E-01 8.92E-01 1.15E-01  
7.20E+00 1.06E+00 1.76E-01 8.93E-01 1.15E-01  
7.23E+00 1.05E+00 1.75E-01 8.97E-01 1.15E-01  
7.26E+00 1.05E+00 1.71E-01 9.01E-01 1.15E-01  
7.29E+00 1.04E+00 1.71E-01 9.06E-01 1.15E-01  
7.32E+00 1.03E+00 1.71E-01 9.12E-01 1.14E-01  
7.35E+00 1.02E+00 1.69E-01 9.16E-01 1.13E-01  
7.38E+00 1.01E+00 1.66E-01 9.22E-01 1.14E-01  
7.41E+00 1.01E+00 1.68E-01 9.26E-01 1.13E-01



---

7.44E+00 1.00E+00 1.66E-01 9.34E-01 1.13E-01  
7.47E+00 9.95E-01 1.66E-01 9.39E-01 1.12E-01  
7.50E+00 9.92E-01 1.64E-01 9.44E-01 1.12E-01  
7.53E+00 9.84E-01 1.64E-01 9.49E-01 1.12E-01  
7.56E+00 9.79E-01 1.59E-01 9.55E-01 1.13E-01  
7.59E+00 9.77E-01 1.60E-01 9.64E-01 1.14E-01  
7.62E+00 9.74E-01 1.58E-01 9.72E-01 1.13E-01  
7.65E+00 9.69E-01 1.58E-01 9.79E-01 1.13E-01  
7.68E+00 9.65E-01 1.56E-01 9.85E-01 1.11E-01  
7.71E+00 9.59E-01 1.57E-01 9.92E-01 1.12E-01  
7.74E+00 9.57E-01 1.54E-01 9.97E-01 1.12E-01  
7.77E+00 9.53E-01 1.54E-01 1.00E+00 1.12E-01  
7.80E+00 9.51E-01 1.53E-01 1.01E+00 1.13E-01  
7.83E+00 9.49E-01 1.51E-01 1.02E+00 1.11E-01  
7.86E+00 9.44E-01 1.52E-01 1.02E+00 1.12E-01  
7.89E+00 9.41E-01 1.51E-01 1.03E+00 1.11E-01  
7.92E+00 9.40E-01 1.51E-01 1.03E+00 1.12E-01  
7.95E+00 9.37E-01 1.48E-01 1.04E+00 1.11E-01  
7.98E+00 9.37E-01 1.48E-01 1.04E+00 1.11E-01  
8.01E+00 9.37E-01 1.48E-01 1.05E+00 1.10E-01  
8.04E+00 9.35E-01 1.48E-01 1.05E+00 1.11E-01  
8.07E+00 9.32E-01 1.46E-01 1.05E+00 1.10E-01  
8.10E+00 9.34E-01 1.46E-01 1.06E+00 1.09E-01  
8.13E+00 9.35E-01 1.47E-01 1.06E+00 1.09E-01  
8.16E+00 9.34E-01 1.47E-01 1.06E+00 1.10E-01  
8.19E+00 9.35E-01 1.45E-01 1.06E+00 1.09E-01  
8.22E+00 9.37E-01 1.45E-01 1.06E+00 1.09E-01  
8.25E+00 9.39E-01 1.44E-01 1.06E+00 1.09E-01  
8.28E+00 9.41E-01 1.45E-01 1.06E+00 1.08E-01  
8.31E+00 9.43E-01 1.43E-01 1.06E+00 1.07E-01  
8.34E+00 9.44E-01 1.43E-01 1.06E+00 1.07E-01  
8.37E+00 9.48E-01 1.44E-01 1.06E+00 1.07E-01  
8.40E+00 9.54E-01 1.42E-01 1.06E+00 1.07E-01  
8.43E+00 9.58E-01 1.44E-01 1.06E+00 1.06E-01  
8.46E+00 9.59E-01 1.44E-01 1.05E+00 1.06E-01  
8.49E+00 9.63E-01 1.41E-01 1.05E+00 1.06E-01  
8.52E+00 9.66E-01 1.42E-01 1.05E+00 1.04E-01  
8.55E+00 9.69E-01 1.43E-01 1.04E+00 1.02E-01  
8.58E+00 9.75E-01 1.42E-01 1.04E+00 1.03E-01  
8.61E+00 9.75E-01 1.42E-01 1.04E+00 1.03E-01  
8.64E+00 9.80E-01 1.40E-01 1.03E+00 1.02E-01  
8.67E+00 9.82E-01 1.39E-01 1.03E+00 1.02E-01

---

8.70E+00 9.88E-01 1.40E-01 1.03E+00 1.02E-01  
8.73E+00 9.92E-01 1.41E-01 1.02E+00 1.01E-01  
8.76E+00 9.94E-01 1.39E-01 1.02E+00 1.01E-01  
8.79E+00 9.96E-01 1.40E-01 1.02E+00 1.00E-01  
8.82E+00 1.00E+00 1.38E-01 1.01E+00 9.90E-02  
8.85E+00 1.00E+00 1.39E-01 1.01E+00 9.99E-02  
8.88E+00 1.00E+00 1.40E-01 1.01E+00 9.79E-02  
8.91E+00 1.01E+00 1.38E-01 1.00E+00 9.87E-02  
8.94E+00 1.01E+00 1.37E-01 1.00E+00 9.79E-02  
8.97E+00 1.01E+00 1.36E-01 9.96E-01 9.84E-02  
9.00E+00 1.01E+00 1.39E-01 9.93E-01 9.62E-02  
9.03E+00 1.01E+00 1.37E-01 9.92E-01 9.56E-02  
9.06E+00 1.02E+00 1.37E-01 9.89E-01 9.56E-02  
9.09E+00 1.02E+00 1.36E-01 9.87E-01 9.59E-02  
9.12E+00 1.02E+00 1.36E-01 9.84E-01 9.47E-02  
9.15E+00 1.03E+00 1.37E-01 9.81E-01 9.42E-02  
9.18E+00 1.02E+00 1.35E-01 9.80E-01 9.40E-02  
9.21E+00 1.03E+00 1.35E-01 9.76E-01 9.41E-02  
9.24E+00 1.03E+00 1.33E-01 9.76E-01 9.34E-02  
9.27E+00 1.02E+00 1.35E-01 9.72E-01 9.17E-02  
9.30E+00 1.03E+00 1.32E-01 9.71E-01 9.33E-02  
9.33E+00 1.03E+00 1.32E-01 9.72E-01 9.15E-02  
9.36E+00 1.03E+00 1.34E-01 9.70E-01 9.09E-02  
9.39E+00 1.03E+00 1.34E-01 9.71E-01 9.15E-02  
9.42E+00 1.03E+00 1.31E-01 9.69E-01 9.01E-02  
9.45E+00 1.03E+00 1.30E-01 9.70E-01 9.07E-02  
9.48E+00 1.03E+00 1.30E-01 9.68E-01 9.05E-02  
9.51E+00 1.03E+00 1.31E-01 9.67E-01 9.03E-02  
9.54E+00 1.03E+00 1.31E-01 9.66E-01 8.97E-02  
9.57E+00 1.03E+00 1.31E-01 9.68E-01 8.93E-02  
9.60E+00 1.03E+00 1.31E-01 9.67E-01 8.85E-02  
9.63E+00 1.02E+00 1.30E-01 9.68E-01 8.98E-02  
9.66E+00 1.03E+00 1.28E-01 9.68E-01 8.84E-02  
9.69E+00 1.02E+00 1.28E-01 9.69E-01 8.87E-02  
9.72E+00 1.02E+00 1.29E-01 9.70E-01 8.84E-02  
9.75E+00 1.02E+00 1.28E-01 9.69E-01 8.87E-02  
9.78E+00 1.02E+00 1.28E-01 9.69E-01 8.80E-02  
9.81E+00 1.02E+00 1.25E-01 9.72E-01 8.76E-02  
9.84E+00 1.02E+00 1.26E-01 9.71E-01 8.63E-02  
9.87E+00 1.01E+00 1.25E-01 9.74E-01 8.69E-02  
9.90E+00 1.01E+00 1.23E-01 9.75E-01 8.76E-02  
9.93E+00 1.01E+00 1.24E-01 9.77E-01 8.66E-02

9.96E+00 1.01E+00 1.24E-01 9.77E-01 8.63E-02

9.99E+00 1.01E+00 1.23E-01 9.76E-01 8.52E-02

1.00E+01 1.01E+00 1.23E-01 9.79E-01 8.64E-02

2 m MgCl<sub>2</sub>-Water  $g(r)$  at 4 GPa 500 K; distance  $r$ ,  $g(r)$  and errors

| $r$      | Mg-Ow    | Mg-Hw    | Cl-Ow    | Cl-Hw    |
|----------|----------|----------|----------|----------|
| 0.00E+00 | 0.00E+00 | 0.00E+00 | 0.00E+00 | 0.00E+00 |
| 7.50E-03 | 0.00E+00 | 0.00E+00 | 0.00E+00 | 0.00E+00 |
| 3.00E-02 | 0.00E+00 | 0.00E+00 | 0.00E+00 | 0.00E+00 |
| 6.00E-02 | 0.00E+00 | 0.00E+00 | 0.00E+00 | 0.00E+00 |
| 9.00E-02 | 0.00E+00 | 0.00E+00 | 0.00E+00 | 0.00E+00 |
| 1.20E-01 | 0.00E+00 | 0.00E+00 | 0.00E+00 | 0.00E+00 |
| 1.50E-01 | 0.00E+00 | 0.00E+00 | 0.00E+00 | 0.00E+00 |
| 1.80E-01 | 0.00E+00 | 0.00E+00 | 0.00E+00 | 0.00E+00 |
| 2.10E-01 | 0.00E+00 | 0.00E+00 | 0.00E+00 | 0.00E+00 |
| 2.40E-01 | 0.00E+00 | 0.00E+00 | 0.00E+00 | 0.00E+00 |
| 2.70E-01 | 0.00E+00 | 0.00E+00 | 0.00E+00 | 0.00E+00 |
| 3.00E-01 | 0.00E+00 | 0.00E+00 | 0.00E+00 | 0.00E+00 |
| 3.30E-01 | 0.00E+00 | 0.00E+00 | 0.00E+00 | 0.00E+00 |
| 3.60E-01 | 0.00E+00 | 0.00E+00 | 0.00E+00 | 0.00E+00 |
| 3.90E-01 | 0.00E+00 | 0.00E+00 | 0.00E+00 | 0.00E+00 |
| 4.20E-01 | 0.00E+00 | 0.00E+00 | 0.00E+00 | 0.00E+00 |
| 4.50E-01 | 0.00E+00 | 0.00E+00 | 0.00E+00 | 0.00E+00 |
| 4.80E-01 | 0.00E+00 | 0.00E+00 | 0.00E+00 | 0.00E+00 |
| 5.10E-01 | 0.00E+00 | 0.00E+00 | 0.00E+00 | 0.00E+00 |
| 5.40E-01 | 0.00E+00 | 0.00E+00 | 0.00E+00 | 0.00E+00 |
| 5.70E-01 | 0.00E+00 | 0.00E+00 | 0.00E+00 | 0.00E+00 |
| 6.00E-01 | 0.00E+00 | 0.00E+00 | 0.00E+00 | 0.00E+00 |
| 6.30E-01 | 0.00E+00 | 0.00E+00 | 0.00E+00 | 0.00E+00 |
| 6.60E-01 | 0.00E+00 | 0.00E+00 | 0.00E+00 | 0.00E+00 |
| 6.90E-01 | 0.00E+00 | 0.00E+00 | 0.00E+00 | 0.00E+00 |
| 7.20E-01 | 0.00E+00 | 0.00E+00 | 0.00E+00 | 0.00E+00 |
| 7.50E-01 | 0.00E+00 | 0.00E+00 | 0.00E+00 | 0.00E+00 |
| 7.80E-01 | 0.00E+00 | 0.00E+00 | 0.00E+00 | 0.00E+00 |
| 8.10E-01 | 0.00E+00 | 0.00E+00 | 0.00E+00 | 0.00E+00 |
| 8.40E-01 | 0.00E+00 | 0.00E+00 | 0.00E+00 | 0.00E+00 |
| 8.70E-01 | 0.00E+00 | 0.00E+00 | 0.00E+00 | 0.00E+00 |
| 9.00E-01 | 0.00E+00 | 0.00E+00 | 0.00E+00 | 0.00E+00 |
| 9.30E-01 | 0.00E+00 | 0.00E+00 | 0.00E+00 | 0.00E+00 |
| 9.60E-01 | 0.00E+00 | 0.00E+00 | 0.00E+00 | 0.00E+00 |
| 9.90E-01 | 0.00E+00 | 0.00E+00 | 0.00E+00 | 0.00E+00 |
| 1.02E+00 | 0.00E+00 | 0.00E+00 | 0.00E+00 | 0.00E+00 |

1.05E+00 0.00E+00 0.00E+00 0.00E+00 0.00E+00 0.00E+00 0.00E+00 0.00E+00 0.00E+00  
1.08E+00 0.00E+00 0.00E+00 0.00E+00 0.00E+00 0.00E+00 0.00E+00 0.00E+00 0.00E+00  
1.11E+00 0.00E+00 0.00E+00 0.00E+00 0.00E+00 0.00E+00 0.00E+00 0.00E+00 0.00E+00  
1.14E+00 0.00E+00 0.00E+00 0.00E+00 0.00E+00 0.00E+00 0.00E+00 0.00E+00 0.00E+00  
1.17E+00 0.00E+00 0.00E+00 0.00E+00 0.00E+00 0.00E+00 0.00E+00 0.00E+00 0.00E+00  
1.20E+00 0.00E+00 0.00E+00 0.00E+00 0.00E+00 0.00E+00 0.00E+00 0.00E+00 0.00E+00  
1.23E+00 0.00E+00 0.00E+00 0.00E+00 0.00E+00 0.00E+00 0.00E+00 0.00E+00 0.00E+00  
1.26E+00 0.00E+00 0.00E+00 0.00E+00 0.00E+00 0.00E+00 0.00E+00 0.00E+00 0.00E+00  
1.29E+00 0.00E+00 0.00E+00 0.00E+00 0.00E+00 0.00E+00 0.00E+00 0.00E+00 0.00E+00  
1.32E+00 0.00E+00 0.00E+00 0.00E+00 0.00E+00 0.00E+00 0.00E+00 0.00E+00 0.00E+00  
1.35E+00 0.00E+00 0.00E+00 0.00E+00 0.00E+00 0.00E+00 0.00E+00 3.50E-05 2.75E-03  
1.38E+00 0.00E+00 0.00E+00 0.00E+00 0.00E+00 0.00E+00 0.00E+00 8.36E-05 4.16E-03  
1.41E+00 0.00E+00 0.00E+00 0.00E+00 0.00E+00 0.00E+00 0.00E+00 1.93E-04 6.05E-03  
1.44E+00 0.00E+00 0.00E+00 0.00E+00 0.00E+00 0.00E+00 0.00E+00 3.54E-04 8.10E-03  
1.47E+00 0.00E+00 0.00E+00 0.00E+00 0.00E+00 0.00E+00 0.00E+00 6.19E-04 1.05E-02  
1.50E+00 0.00E+00 0.00E+00 0.00E+00 0.00E+00 0.00E+00 0.00E+00 9.98E-04 1.32E-02  
1.53E+00 0.00E+00 0.00E+00 0.00E+00 0.00E+00 0.00E+00 0.00E+00 1.72E-03 1.66E-02  
1.56E+00 0.00E+00 0.00E+00 0.00E+00 0.00E+00 0.00E+00 0.00E+00 2.94E-03 2.15E-02  
1.59E+00 0.00E+00 0.00E+00 0.00E+00 0.00E+00 0.00E+00 0.00E+00 5.30E-03 2.83E-02  
1.62E+00 0.00E+00 0.00E+00 0.00E+00 0.00E+00 0.00E+00 0.00E+00 9.70E-03 3.72E-02  
1.65E+00 3.51E-04 1.40E-02 0.00E+00 0.00E+00 0.00E+00 0.00E+00 1.65E-02 4.81E-02  
1.68E+00 1.58E-03 2.90E-02 0.00E+00 0.00E+00 0.00E+00 0.00E+00 2.74E-02 6.11E-02  
1.71E+00 9.54E-03 7.29E-02 0.00E+00 0.00E+00 0.00E+00 0.00E+00 4.57E-02 7.74E-02  
1.74E+00 7.55E-02 2.01E-01 0.00E+00 0.00E+00 0.00E+00 0.00E+00 7.30E-02 9.50E-02  
1.77E+00 4.59E-01 4.88E-01 0.00E+00 0.00E+00 0.00E+00 0.00E+00 1.11E-01 1.15E-01  
1.80E+00 1.75E+00 9.04E-01 0.00E+00 0.00E+00 0.00E+00 0.00E+00 1.66E-01 1.39E-01  
1.83E+00 4.45E+00 1.36E+00 0.00E+00 0.00E+00 0.00E+00 0.00E+00 2.40E-01 1.65E-01  
1.86E+00 8.03E+00 1.75E+00 1.84E-05 2.05E-03 0.00E+00 0.00E+00 3.44E-01 1.93E-01  
1.89E+00 1.11E+01 2.02E+00 3.57E-05 2.81E-03 0.00E+00 0.00E+00 4.65E-01 2.20E-01  
1.92E+00 1.25E+01 2.12E+00 3.46E-05 2.72E-03 0.00E+00 0.00E+00 6.13E-01 2.52E-01  
1.95E+00 1.19E+01 2.06E+00 2.02E-04 6.19E-03 0.00E+00 0.00E+00 7.76E-01 2.74E-01  
1.98E+00 1.01E+01 1.88E+00 6.99E-04 1.17E-02 0.00E+00 0.00E+00 9.57E-01 3.03E-01  
2.01E+00 7.84E+00 1.67E+00 1.63E-03 1.76E-02 0.00E+00 0.00E+00 1.13E+00 3.24E-01  
2.04E+00 5.77E+00 1.39E+00 3.02E-03 2.40E-02 0.00E+00 0.00E+00 1.31E+00 3.41E-01  
2.07E+00 4.03E+00 1.14E+00 6.31E-03 3.37E-02 0.00E+00 0.00E+00 1.46E+00 3.55E-01  
2.10E+00 2.73E+00 9.30E-01 1.26E-02 4.69E-02 0.00E+00 0.00E+00 1.58E+00 3.62E-01  
2.13E+00 1.86E+00 7.66E-01 2.51E-02 6.51E-02 0.00E+00 0.00E+00 1.68E+00 3.64E-01  
2.16E+00 1.25E+00 6.27E-01 4.63E-02 8.72E-02 0.00E+00 0.00E+00 1.73E+00 3.74E-01  
2.19E+00 8.39E-01 5.10E-01 8.04E-02 1.15E-01 0.00E+00 0.00E+00 1.75E+00 3.63E-01  
2.22E+00 5.65E-01 4.09E-01 1.39E-01 1.49E-01 0.00E+00 0.00E+00 1.73E+00 3.61E-01  
2.25E+00 3.93E-01 3.42E-01 2.32E-01 1.87E-01 0.00E+00 0.00E+00 1.70E+00 3.52E-01  
2.28E+00 2.78E-01 2.84E-01 3.67E-01 2.35E-01 0.00E+00 0.00E+00 1.64E+00 3.40E-01

2.31E+00 1.98E-01 2.40E-01 5.50E-01 2.85E-01 0.00E+00 0.00E+00 1.57E+00 3.31E-01  
2.34E+00 1.44E-01 2.04E-01 7.95E-01 3.35E-01 0.00E+00 0.00E+00 1.49E+00 3.15E-01  
2.37E+00 1.06E-01 1.72E-01 1.11E+00 3.87E-01 0.00E+00 0.00E+00 1.40E+00 3.04E-01  
2.40E+00 8.08E-02 1.48E-01 1.49E+00 4.38E-01 0.00E+00 0.00E+00 1.31E+00 2.90E-01  
2.43E+00 6.37E-02 1.31E-01 1.91E+00 4.97E-01 0.00E+00 0.00E+00 1.23E+00 2.77E-01  
2.46E+00 4.96E-02 1.13E-01 2.36E+00 5.32E-01 0.00E+00 0.00E+00 1.15E+00 2.67E-01  
2.49E+00 4.05E-02 9.94E-02 2.79E+00 5.74E-01 0.00E+00 0.00E+00 1.07E+00 2.53E-01  
2.52E+00 3.27E-02 8.85E-02 3.18E+00 6.09E-01 0.00E+00 0.00E+00 1.00E+00 2.47E-01  
2.55E+00 2.79E-02 8.24E-02 3.49E+00 6.23E-01 1.96E-05 1.54E-03 9.52E-01 2.33E-01  
2.58E+00 2.50E-02 7.69E-02 3.67E+00 6.25E-01 0.00E+00 0.00E+00 9.09E-01 2.24E-01  
2.61E+00 2.10E-02 7.03E-02 3.74E+00 6.26E-01 1.40E-05 1.16E-03 8.68E-01 2.20E-01  
2.64E+00 1.89E-02 6.59E-02 3.66E+00 6.16E-01 9.13E-06 1.01E-03 8.40E-01 2.14E-01  
2.67E+00 1.81E-02 6.43E-02 3.44E+00 5.87E-01 7.59E-05 2.85E-03 8.20E-01 2.08E-01  
2.70E+00 1.79E-02 6.35E-02 3.14E+00 5.62E-01 2.58E-04 5.20E-03 8.05E-01 2.03E-01  
2.73E+00 1.55E-02 5.95E-02 2.76E+00 5.20E-01 1.02E-03 1.01E-02 7.96E-01 2.02E-01  
2.76E+00 1.46E-02 5.62E-02 2.35E+00 4.76E-01 6.01E-03 2.47E-02 7.99E-01 1.97E-01  
2.79E+00 1.45E-02 5.55E-02 1.93E+00 4.26E-01 2.41E-02 4.91E-02 8.04E-01 1.99E-01  
2.82E+00 1.46E-02 5.46E-02 1.54E+00 3.79E-01 7.29E-02 8.30E-02 8.19E-01 1.98E-01  
2.85E+00 1.40E-02 5.33E-02 1.20E+00 3.30E-01 1.85E-01 1.33E-01 8.37E-01 1.98E-01  
2.88E+00 1.44E-02 5.27E-02 9.22E-01 2.91E-01 3.95E-01 1.89E-01 8.63E-01 2.00E-01  
2.91E+00 1.51E-02 5.55E-02 6.92E-01 2.45E-01 7.19E-01 2.53E-01 8.89E-01 2.00E-01  
2.94E+00 1.44E-02 5.29E-02 5.09E-01 2.14E-01 1.16E+00 3.17E-01 9.19E-01 1.98E-01  
2.97E+00 1.51E-02 5.33E-02 3.82E-01 1.81E-01 1.68E+00 3.73E-01 9.53E-01 2.03E-01  
3.00E+00 1.53E-02 5.33E-02 2.91E-01 1.59E-01 2.21E+00 4.21E-01 9.91E-01 2.00E-01  
3.03E+00 1.77E-02 5.75E-02 2.30E-01 1.38E-01 2.69E+00 4.55E-01 1.03E+00 2.07E-01  
3.06E+00 1.94E-02 5.90E-02 1.96E-01 1.28E-01 3.08E+00 4.82E-01 1.07E+00 2.07E-01  
3.09E+00 2.03E-02 6.00E-02 1.77E-01 1.21E-01 3.33E+00 5.01E-01 1.10E+00 2.09E-01  
3.12E+00 2.40E-02 6.44E-02 1.68E-01 1.16E-01 3.46E+00 5.04E-01 1.13E+00 2.10E-01  
3.15E+00 2.76E-02 6.80E-02 1.71E-01 1.16E-01 3.46E+00 4.99E-01 1.17E+00 2.09E-01  
3.18E+00 3.40E-02 7.57E-02 1.75E-01 1.16E-01 3.37E+00 4.92E-01 1.20E+00 2.10E-01  
3.21E+00 4.28E-02 8.27E-02 1.85E-01 1.16E-01 3.23E+00 4.79E-01 1.22E+00 2.10E-01  
3.24E+00 5.50E-02 9.22E-02 2.01E-01 1.21E-01 3.05E+00 4.55E-01 1.24E+00 2.10E-01  
3.27E+00 7.27E-02 1.07E-01 2.15E-01 1.24E-01 2.86E+00 4.42E-01 1.26E+00 2.11E-01  
3.30E+00 9.61E-02 1.18E-01 2.36E-01 1.28E-01 2.66E+00 4.30E-01 1.27E+00 2.09E-01  
3.33E+00 1.24E-01 1.35E-01 2.55E-01 1.33E-01 2.49E+00 4.12E-01 1.28E+00 2.07E-01  
3.36E+00 1.64E-01 1.52E-01 2.78E-01 1.37E-01 2.32E+00 3.89E-01 1.28E+00 2.07E-01  
3.39E+00 2.13E-01 1.70E-01 3.03E-01 1.42E-01 2.17E+00 3.71E-01 1.28E+00 2.03E-01  
3.42E+00 2.68E-01 1.88E-01 3.29E-01 1.45E-01 2.03E+00 3.60E-01 1.28E+00 1.99E-01  
3.45E+00 3.35E-01 2.10E-01 3.58E-01 1.52E-01 1.90E+00 3.44E-01 1.27E+00 2.00E-01  
3.48E+00 4.12E-01 2.30E-01 3.90E-01 1.57E-01 1.78E+00 3.28E-01 1.26E+00 1.97E-01  
3.51E+00 4.99E-01 2.47E-01 4.25E-01 1.61E-01 1.68E+00 3.21E-01 1.25E+00 1.94E-01  
3.54E+00 5.94E-01 2.68E-01 4.63E-01 1.65E-01 1.57E+00 3.03E-01 1.24E+00 1.92E-01

3.57E+00 6.93E-01 2.87E-01 4.95E-01 1.72E-01 1.49E+00 2.96E-01 1.22E+00 1.91E-01  
3.60E+00 8.00E-01 3.02E-01 5.39E-01 1.78E-01 1.40E+00 2.84E-01 1.20E+00 1.87E-01  
3.63E+00 9.06E-01 3.22E-01 5.79E-01 1.81E-01 1.33E+00 2.76E-01 1.18E+00 1.85E-01  
3.66E+00 1.01E+00 3.35E-01 6.25E-01 1.88E-01 1.25E+00 2.63E-01 1.16E+00 1.81E-01  
3.69E+00 1.13E+00 3.54E-01 6.69E-01 1.91E-01 1.18E+00 2.55E-01 1.14E+00 1.79E-01  
3.72E+00 1.24E+00 3.63E-01 7.15E-01 1.97E-01 1.12E+00 2.48E-01 1.12E+00 1.75E-01  
3.75E+00 1.33E+00 3.71E-01 7.61E-01 2.00E-01 1.07E+00 2.41E-01 1.10E+00 1.70E-01  
3.78E+00 1.41E+00 3.82E-01 8.09E-01 2.05E-01 1.02E+00 2.33E-01 1.09E+00 1.69E-01  
3.81E+00 1.49E+00 3.87E-01 8.51E-01 2.08E-01 9.67E-01 2.24E-01 1.07E+00 1.68E-01  
3.84E+00 1.55E+00 3.92E-01 8.97E-01 2.13E-01 9.19E-01 2.17E-01 1.06E+00 1.63E-01  
3.87E+00 1.60E+00 3.97E-01 9.40E-01 2.16E-01 8.80E-01 2.09E-01 1.04E+00 1.62E-01  
3.90E+00 1.64E+00 4.04E-01 9.83E-01 2.19E-01 8.43E-01 2.05E-01 1.03E+00 1.59E-01  
3.93E+00 1.66E+00 4.02E-01 1.03E+00 2.23E-01 8.10E-01 2.00E-01 1.02E+00 1.58E-01  
3.96E+00 1.67E+00 3.99E-01 1.06E+00 2.25E-01 7.73E-01 1.93E-01 1.01E+00 1.56E-01  
3.99E+00 1.68E+00 3.98E-01 1.10E+00 2.27E-01 7.50E-01 1.91E-01 1.00E+00 1.55E-01  
4.02E+00 1.67E+00 3.95E-01 1.13E+00 2.30E-01 7.24E-01 1.83E-01 9.89E-01 1.52E-01  
4.05E+00 1.66E+00 3.94E-01 1.16E+00 2.29E-01 6.96E-01 1.80E-01 9.81E-01 1.50E-01  
4.08E+00 1.64E+00 3.84E-01 1.19E+00 2.31E-01 6.83E-01 1.78E-01 9.68E-01 1.48E-01  
4.11E+00 1.62E+00 3.74E-01 1.22E+00 2.32E-01 6.64E-01 1.71E-01 9.59E-01 1.46E-01  
4.14E+00 1.59E+00 3.76E-01 1.24E+00 2.33E-01 6.53E-01 1.70E-01 9.49E-01 1.46E-01  
4.17E+00 1.57E+00 3.70E-01 1.26E+00 2.35E-01 6.42E-01 1.68E-01 9.37E-01 1.42E-01  
4.20E+00 1.54E+00 3.60E-01 1.28E+00 2.31E-01 6.35E-01 1.64E-01 9.30E-01 1.41E-01  
4.23E+00 1.52E+00 3.55E-01 1.30E+00 2.31E-01 6.32E-01 1.62E-01 9.23E-01 1.38E-01  
4.26E+00 1.48E+00 3.49E-01 1.31E+00 2.35E-01 6.30E-01 1.61E-01 9.15E-01 1.38E-01  
4.29E+00 1.46E+00 3.41E-01 1.32E+00 2.33E-01 6.31E-01 1.59E-01 9.11E-01 1.37E-01  
4.32E+00 1.43E+00 3.34E-01 1.34E+00 2.31E-01 6.23E-01 1.59E-01 9.07E-01 1.34E-01  
4.35E+00 1.41E+00 3.37E-01 1.34E+00 2.28E-01 6.22E-01 1.58E-01 9.04E-01 1.34E-01  
4.38E+00 1.39E+00 3.29E-01 1.35E+00 2.29E-01 6.17E-01 1.58E-01 9.00E-01 1.32E-01  
4.41E+00 1.37E+00 3.23E-01 1.35E+00 2.28E-01 6.17E-01 1.53E-01 9.01E-01 1.31E-01  
4.44E+00 1.35E+00 3.20E-01 1.35E+00 2.26E-01 6.16E-01 1.54E-01 8.97E-01 1.32E-01  
4.47E+00 1.33E+00 3.13E-01 1.34E+00 2.23E-01 6.13E-01 1.54E-01 8.95E-01 1.30E-01  
4.50E+00 1.31E+00 3.10E-01 1.34E+00 2.24E-01 6.13E-01 1.52E-01 8.95E-01 1.28E-01  
4.53E+00 1.29E+00 3.09E-01 1.33E+00 2.20E-01 6.13E-01 1.50E-01 8.93E-01 1.29E-01  
4.56E+00 1.27E+00 3.01E-01 1.32E+00 2.18E-01 6.15E-01 1.48E-01 8.93E-01 1.27E-01  
4.59E+00 1.24E+00 2.98E-01 1.31E+00 2.15E-01 6.18E-01 1.49E-01 8.89E-01 1.26E-01  
4.62E+00 1.22E+00 2.93E-01 1.30E+00 2.13E-01 6.24E-01 1.48E-01 8.92E-01 1.26E-01  
4.65E+00 1.19E+00 2.85E-01 1.28E+00 2.12E-01 6.35E-01 1.50E-01 8.89E-01 1.23E-01  
4.68E+00 1.16E+00 2.80E-01 1.26E+00 2.06E-01 6.43E-01 1.50E-01 8.88E-01 1.23E-01  
4.71E+00 1.13E+00 2.79E-01 1.25E+00 2.05E-01 6.57E-01 1.49E-01 8.88E-01 1.23E-01  
4.74E+00 1.09E+00 2.70E-01 1.23E+00 2.03E-01 6.69E-01 1.51E-01 8.89E-01 1.23E-01  
4.77E+00 1.06E+00 2.64E-01 1.21E+00 1.99E-01 6.86E-01 1.53E-01 8.92E-01 1.22E-01  
4.80E+00 1.02E+00 2.58E-01 1.19E+00 1.98E-01 7.01E-01 1.52E-01 8.94E-01 1.21E-01

4.83E+00 9.88E-01 2.51E-01 1.17E+00 1.93E-01 7.17E-01 1.54E-01 8.97E-01 1.20E-01  
4.86E+00 9.53E-01 2.43E-01 1.15E+00 1.91E-01 7.38E-01 1.55E-01 9.00E-01 1.20E-01  
4.89E+00 9.20E-01 2.41E-01 1.12E+00 1.87E-01 7.61E-01 1.56E-01 9.03E-01 1.19E-01  
4.92E+00 8.90E-01 2.38E-01 1.11E+00 1.86E-01 7.83E-01 1.56E-01 9.07E-01 1.19E-01  
4.95E+00 8.58E-01 2.28E-01 1.08E+00 1.84E-01 8.08E-01 1.59E-01 9.10E-01 1.18E-01  
4.98E+00 8.29E-01 2.25E-01 1.07E+00 1.79E-01 8.32E-01 1.58E-01 9.12E-01 1.18E-01  
5.01E+00 8.07E-01 2.22E-01 1.05E+00 1.74E-01 8.59E-01 1.61E-01 9.17E-01 1.17E-01  
5.04E+00 7.81E-01 2.17E-01 1.03E+00 1.75E-01 8.88E-01 1.62E-01 9.20E-01 1.16E-01  
5.07E+00 7.62E-01 2.13E-01 1.01E+00 1.70E-01 9.15E-01 1.64E-01 9.25E-01 1.17E-01  
5.10E+00 7.42E-01 2.08E-01 9.97E-01 1.70E-01 9.42E-01 1.64E-01 9.30E-01 1.16E-01  
5.13E+00 7.26E-01 2.06E-01 9.80E-01 1.67E-01 9.71E-01 1.67E-01 9.35E-01 1.16E-01  
5.16E+00 7.12E-01 2.00E-01 9.68E-01 1.67E-01 1.00E+00 1.69E-01 9.41E-01 1.15E-01  
5.19E+00 7.03E-01 1.98E-01 9.55E-01 1.64E-01 1.03E+00 1.72E-01 9.46E-01 1.15E-01  
5.22E+00 6.90E-01 1.96E-01 9.47E-01 1.61E-01 1.05E+00 1.71E-01 9.51E-01 1.16E-01  
5.25E+00 6.79E-01 1.93E-01 9.36E-01 1.61E-01 1.08E+00 1.72E-01 9.61E-01 1.14E-01  
5.28E+00 6.73E-01 1.92E-01 9.26E-01 1.61E-01 1.11E+00 1.71E-01 9.68E-01 1.14E-01  
5.31E+00 6.68E-01 1.90E-01 9.18E-01 1.57E-01 1.13E+00 1.73E-01 9.74E-01 1.14E-01  
5.34E+00 6.65E-01 1.88E-01 9.10E-01 1.55E-01 1.16E+00 1.76E-01 9.83E-01 1.14E-01  
5.37E+00 6.61E-01 1.86E-01 9.02E-01 1.54E-01 1.19E+00 1.76E-01 9.91E-01 1.14E-01  
5.40E+00 6.63E-01 1.86E-01 8.98E-01 1.53E-01 1.21E+00 1.76E-01 9.96E-01 1.13E-01  
5.43E+00 6.61E-01 1.83E-01 8.93E-01 1.51E-01 1.23E+00 1.78E-01 1.01E+00 1.12E-01  
5.46E+00 6.57E-01 1.81E-01 8.85E-01 1.49E-01 1.25E+00 1.78E-01 1.01E+00 1.14E-01  
5.49E+00 6.63E-01 1.84E-01 8.82E-01 1.47E-01 1.27E+00 1.76E-01 1.02E+00 1.14E-01  
5.52E+00 6.70E-01 1.81E-01 8.79E-01 1.47E-01 1.29E+00 1.76E-01 1.03E+00 1.13E-01  
5.55E+00 6.70E-01 1.81E-01 8.73E-01 1.48E-01 1.31E+00 1.77E-01 1.04E+00 1.11E-01  
5.58E+00 6.79E-01 1.82E-01 8.71E-01 1.47E-01 1.33E+00 1.78E-01 1.04E+00 1.12E-01  
5.61E+00 6.85E-01 1.81E-01 8.68E-01 1.45E-01 1.34E+00 1.79E-01 1.05E+00 1.12E-01  
5.64E+00 6.93E-01 1.79E-01 8.67E-01 1.46E-01 1.35E+00 1.77E-01 1.06E+00 1.12E-01  
5.67E+00 7.07E-01 1.83E-01 8.68E-01 1.44E-01 1.36E+00 1.79E-01 1.06E+00 1.12E-01  
5.70E+00 7.19E-01 1.83E-01 8.67E-01 1.42E-01 1.36E+00 1.77E-01 1.07E+00 1.11E-01  
5.73E+00 7.32E-01 1.84E-01 8.65E-01 1.41E-01 1.36E+00 1.78E-01 1.07E+00 1.11E-01  
5.76E+00 7.47E-01 1.86E-01 8.68E-01 1.42E-01 1.35E+00 1.74E-01 1.08E+00 1.10E-01  
5.79E+00 7.64E-01 1.84E-01 8.67E-01 1.40E-01 1.34E+00 1.74E-01 1.08E+00 1.09E-01  
5.82E+00 7.83E-01 1.87E-01 8.71E-01 1.41E-01 1.33E+00 1.70E-01 1.08E+00 1.09E-01  
5.85E+00 7.99E-01 1.88E-01 8.75E-01 1.39E-01 1.32E+00 1.71E-01 1.08E+00 1.10E-01  
5.88E+00 8.20E-01 1.89E-01 8.79E-01 1.40E-01 1.30E+00 1.68E-01 1.08E+00 1.08E-01  
5.91E+00 8.45E-01 1.91E-01 8.82E-01 1.39E-01 1.27E+00 1.65E-01 1.08E+00 1.07E-01  
5.94E+00 8.65E-01 1.92E-01 8.87E-01 1.38E-01 1.26E+00 1.65E-01 1.08E+00 1.07E-01  
5.97E+00 8.85E-01 1.96E-01 8.91E-01 1.39E-01 1.23E+00 1.60E-01 1.08E+00 1.07E-01  
6.00E+00 9.09E-01 1.94E-01 8.97E-01 1.37E-01 1.21E+00 1.58E-01 1.08E+00 1.07E-01  
6.03E+00 9.26E-01 1.97E-01 9.06E-01 1.38E-01 1.18E+00 1.57E-01 1.08E+00 1.06E-01  
6.06E+00 9.55E-01 2.01E-01 9.12E-01 1.38E-01 1.16E+00 1.54E-01 1.08E+00 1.05E-01

6.09E+00 9.77E-01 2.02E-01 9.19E-01 1.39E-01 1.14E+00 1.52E-01 1.07E+00 1.05E-01  
6.12E+00 9.95E-01 2.02E-01 9.24E-01 1.38E-01 1.11E+00 1.50E-01 1.07E+00 1.05E-01  
6.15E+00 1.02E+00 2.04E-01 9.35E-01 1.38E-01 1.09E+00 1.46E-01 1.07E+00 1.02E-01  
6.18E+00 1.04E+00 2.07E-01 9.42E-01 1.38E-01 1.07E+00 1.43E-01 1.06E+00 1.02E-01  
6.21E+00 1.06E+00 2.05E-01 9.54E-01 1.38E-01 1.05E+00 1.43E-01 1.06E+00 1.02E-01  
6.24E+00 1.08E+00 2.09E-01 9.58E-01 1.36E-01 1.03E+00 1.40E-01 1.05E+00 1.01E-01  
6.27E+00 1.10E+00 2.08E-01 9.70E-01 1.36E-01 1.01E+00 1.38E-01 1.05E+00 1.00E-01  
6.30E+00 1.12E+00 2.06E-01 9.78E-01 1.38E-01 9.89E-01 1.37E-01 1.05E+00 9.95E-02  
6.33E+00 1.13E+00 2.04E-01 9.89E-01 1.38E-01 9.72E-01 1.35E-01 1.04E+00 9.89E-02  
6.36E+00 1.15E+00 2.05E-01 9.95E-01 1.37E-01 9.57E-01 1.34E-01 1.04E+00 9.75E-02  
6.39E+00 1.16E+00 2.06E-01 1.00E+00 1.37E-01 9.40E-01 1.31E-01 1.03E+00 9.77E-02  
6.42E+00 1.17E+00 2.05E-01 1.01E+00 1.38E-01 9.26E-01 1.31E-01 1.03E+00 9.61E-02  
6.45E+00 1.18E+00 2.04E-01 1.02E+00 1.36E-01 9.12E-01 1.29E-01 1.02E+00 9.77E-02  
6.48E+00 1.19E+00 2.06E-01 1.02E+00 1.35E-01 9.00E-01 1.27E-01 1.02E+00 9.59E-02  
6.51E+00 1.19E+00 2.05E-01 1.03E+00 1.36E-01 8.90E-01 1.26E-01 1.01E+00 9.55E-02  
6.54E+00 1.19E+00 2.03E-01 1.04E+00 1.36E-01 8.81E-01 1.27E-01 1.01E+00 9.36E-02  
6.57E+00 1.19E+00 2.03E-01 1.05E+00 1.37E-01 8.70E-01 1.23E-01 1.00E+00 9.39E-02  
6.60E+00 1.19E+00 2.02E-01 1.05E+00 1.34E-01 8.65E-01 1.24E-01 9.98E-01 9.22E-02  
6.63E+00 1.19E+00 2.02E-01 1.06E+00 1.34E-01 8.58E-01 1.21E-01 9.94E-01 9.24E-02  
6.66E+00 1.19E+00 2.00E-01 1.06E+00 1.35E-01 8.51E-01 1.20E-01 9.88E-01 9.10E-02  
6.69E+00 1.18E+00 2.00E-01 1.06E+00 1.34E-01 8.49E-01 1.20E-01 9.82E-01 9.10E-02  
6.72E+00 1.18E+00 1.98E-01 1.06E+00 1.33E-01 8.44E-01 1.20E-01 9.76E-01 9.02E-02  
6.75E+00 1.18E+00 1.99E-01 1.07E+00 1.33E-01 8.43E-01 1.19E-01 9.73E-01 8.97E-02  
6.78E+00 1.17E+00 1.96E-01 1.07E+00 1.33E-01 8.39E-01 1.18E-01 9.68E-01 8.97E-02  
6.81E+00 1.16E+00 1.93E-01 1.07E+00 1.32E-01 8.40E-01 1.17E-01 9.63E-01 8.83E-02  
6.84E+00 1.15E+00 1.93E-01 1.07E+00 1.31E-01 8.40E-01 1.16E-01 9.59E-01 8.74E-02  
6.87E+00 1.15E+00 1.89E-01 1.07E+00 1.30E-01 8.41E-01 1.16E-01 9.54E-01 8.66E-02  
6.90E+00 1.14E+00 1.90E-01 1.07E+00 1.30E-01 8.42E-01 1.16E-01 9.52E-01 8.73E-02  
6.93E+00 1.13E+00 1.88E-01 1.07E+00 1.29E-01 8.44E-01 1.16E-01 9.47E-01 8.65E-02  
6.96E+00 1.12E+00 1.86E-01 1.07E+00 1.29E-01 8.45E-01 1.15E-01 9.45E-01 8.48E-02  
6.99E+00 1.12E+00 1.86E-01 1.07E+00 1.29E-01 8.49E-01 1.14E-01 9.43E-01 8.54E-02  
7.02E+00 1.11E+00 1.83E-01 1.07E+00 1.27E-01 8.53E-01 1.14E-01 9.42E-01 8.41E-02  
7.05E+00 1.09E+00 1.80E-01 1.07E+00 1.27E-01 8.53E-01 1.14E-01 9.40E-01 8.43E-02  
7.08E+00 1.09E+00 1.80E-01 1.07E+00 1.27E-01 8.60E-01 1.13E-01 9.39E-01 8.35E-02  
7.11E+00 1.08E+00 1.79E-01 1.07E+00 1.27E-01 8.65E-01 1.12E-01 9.36E-01 8.28E-02  
7.14E+00 1.07E+00 1.79E-01 1.06E+00 1.24E-01 8.73E-01 1.12E-01 9.38E-01 8.33E-02  
7.17E+00 1.06E+00 1.76E-01 1.06E+00 1.25E-01 8.75E-01 1.13E-01 9.37E-01 8.40E-02  
7.20E+00 1.05E+00 1.74E-01 1.05E+00 1.23E-01 8.82E-01 1.13E-01 9.38E-01 8.24E-02  
7.23E+00 1.05E+00 1.73E-01 1.05E+00 1.23E-01 8.91E-01 1.13E-01 9.38E-01 8.23E-02  
7.26E+00 1.04E+00 1.73E-01 1.05E+00 1.22E-01 8.96E-01 1.12E-01 9.40E-01 8.16E-02  
7.29E+00 1.03E+00 1.71E-01 1.05E+00 1.21E-01 9.07E-01 1.13E-01 9.41E-01 8.14E-02  
7.32E+00 1.02E+00 1.69E-01 1.04E+00 1.21E-01 9.14E-01 1.13E-01 9.44E-01 8.11E-02



7.35E+00 1.01E+00 1.69E-01 1.04E+00 1.22E-01 9.21E-01 1.13E-01 9.46E-01 8.06E-02  
7.38E+00 1.00E+00 1.66E-01 1.03E+00 1.18E-01 9.31E-01 1.13E-01 9.48E-01 8.03E-02  
7.41E+00 9.95E-01 1.64E-01 1.03E+00 1.18E-01 9.42E-01 1.13E-01 9.50E-01 8.02E-02  
7.44E+00 9.88E-01 1.64E-01 1.02E+00 1.18E-01 9.53E-01 1.15E-01 9.53E-01 8.07E-02  
7.47E+00 9.77E-01 1.62E-01 1.02E+00 1.18E-01 9.61E-01 1.14E-01 9.57E-01 8.09E-02  
7.50E+00 9.69E-01 1.60E-01 1.02E+00 1.16E-01 9.73E-01 1.14E-01 9.59E-01 7.97E-02  
7.53E+00 9.61E-01 1.59E-01 1.01E+00 1.16E-01 9.82E-01 1.14E-01 9.63E-01 7.95E-02  
7.56E+00 9.54E-01 1.59E-01 1.01E+00 1.15E-01 9.91E-01 1.13E-01 9.66E-01 7.99E-02  
7.59E+00 9.50E-01 1.58E-01 1.01E+00 1.14E-01 1.00E+00 1.14E-01 9.70E-01 8.00E-02  
7.62E+00 9.40E-01 1.56E-01 1.00E+00 1.14E-01 1.01E+00 1.14E-01 9.74E-01 7.84E-02  
7.65E+00 9.34E-01 1.55E-01 9.97E-01 1.12E-01 1.02E+00 1.15E-01 9.77E-01 7.78E-02  
7.68E+00 9.27E-01 1.53E-01 9.94E-01 1.14E-01 1.03E+00 1.14E-01 9.82E-01 7.90E-02  
7.71E+00 9.21E-01 1.52E-01 9.92E-01 1.11E-01 1.04E+00 1.16E-01 9.87E-01 8.00E-02  
7.74E+00 9.16E-01 1.51E-01 9.89E-01 1.11E-01 1.05E+00 1.15E-01 9.90E-01 7.87E-02  
7.77E+00 9.14E-01 1.52E-01 9.86E-01 1.11E-01 1.06E+00 1.14E-01 9.94E-01 7.80E-02  
7.80E+00 9.10E-01 1.51E-01 9.83E-01 1.11E-01 1.06E+00 1.15E-01 9.98E-01 7.97E-02  
7.83E+00 9.05E-01 1.50E-01 9.81E-01 1.08E-01 1.07E+00 1.15E-01 1.00E+00 7.80E-02  
7.86E+00 9.01E-01 1.48E-01 9.79E-01 1.09E-01 1.08E+00 1.16E-01 1.00E+00 7.81E-02  
7.89E+00 9.03E-01 1.49E-01 9.77E-01 1.09E-01 1.08E+00 1.16E-01 1.01E+00 7.86E-02  
7.92E+00 8.99E-01 1.46E-01 9.74E-01 1.09E-01 1.09E+00 1.14E-01 1.01E+00 7.78E-02  
7.95E+00 9.01E-01 1.45E-01 9.72E-01 1.08E-01 1.09E+00 1.14E-01 1.02E+00 7.83E-02  
7.98E+00 9.00E-01 1.46E-01 9.71E-01 1.07E-01 1.10E+00 1.14E-01 1.02E+00 7.87E-02  
8.01E+00 9.02E-01 1.46E-01 9.67E-01 1.07E-01 1.10E+00 1.13E-01 1.02E+00 7.79E-02  
8.04E+00 9.03E-01 1.45E-01 9.66E-01 1.06E-01 1.10E+00 1.14E-01 1.03E+00 7.75E-02  
8.07E+00 9.07E-01 1.45E-01 9.65E-01 1.07E-01 1.11E+00 1.14E-01 1.03E+00 7.75E-02  
8.10E+00 9.06E-01 1.44E-01 9.64E-01 1.05E-01 1.11E+00 1.13E-01 1.03E+00 7.65E-02  
8.13E+00 9.12E-01 1.45E-01 9.62E-01 1.04E-01 1.11E+00 1.13E-01 1.03E+00 7.66E-02  
8.16E+00 9.15E-01 1.44E-01 9.63E-01 1.04E-01 1.11E+00 1.12E-01 1.04E+00 7.73E-02  
8.19E+00 9.18E-01 1.43E-01 9.62E-01 1.03E-01 1.11E+00 1.12E-01 1.04E+00 7.62E-02  
8.22E+00 9.20E-01 1.43E-01 9.63E-01 1.03E-01 1.11E+00 1.11E-01 1.04E+00 7.63E-02  
8.25E+00 9.28E-01 1.42E-01 9.64E-01 1.04E-01 1.10E+00 1.11E-01 1.04E+00 7.56E-02  
8.28E+00 9.33E-01 1.42E-01 9.64E-01 1.03E-01 1.10E+00 1.11E-01 1.04E+00 7.54E-02  
8.31E+00 9.40E-01 1.43E-01 9.63E-01 1.01E-01 1.09E+00 1.10E-01 1.04E+00 7.51E-02  
8.34E+00 9.45E-01 1.42E-01 9.65E-01 1.02E-01 1.09E+00 1.09E-01 1.04E+00 7.56E-02  
8.37E+00 9.49E-01 1.43E-01 9.67E-01 1.02E-01 1.09E+00 1.08E-01 1.04E+00 7.47E-02  
8.40E+00 9.58E-01 1.41E-01 9.66E-01 1.02E-01 1.08E+00 1.08E-01 1.04E+00 7.47E-02  
8.43E+00 9.64E-01 1.43E-01 9.69E-01 1.02E-01 1.08E+00 1.06E-01 1.04E+00 7.45E-02  
8.46E+00 9.71E-01 1.41E-01 9.71E-01 1.02E-01 1.07E+00 1.05E-01 1.04E+00 7.38E-02  
8.49E+00 9.79E-01 1.43E-01 9.71E-01 9.96E-02 1.06E+00 1.06E-01 1.04E+00 7.40E-02  
8.52E+00 9.86E-01 1.44E-01 9.73E-01 1.02E-01 1.06E+00 1.04E-01 1.04E+00 7.32E-02  
8.55E+00 9.93E-01 1.43E-01 9.76E-01 1.01E-01 1.05E+00 1.05E-01 1.04E+00 7.33E-02  
8.58E+00 1.00E+00 1.43E-01 9.79E-01 9.96E-02 1.04E+00 1.03E-01 1.04E+00 7.29E-02

8.61E+00 1.00E+00 1.45E-01 9.79E-01 9.98E-02 1.03E+00 1.02E-01 1.04E+00 7.29E-02  
8.64E+00 1.01E+00 1.42E-01 9.84E-01 9.97E-02 1.03E+00 1.02E-01 1.04E+00 7.23E-02  
8.67E+00 1.02E+00 1.43E-01 9.84E-01 9.87E-02 1.02E+00 1.02E-01 1.03E+00 7.22E-02  
8.70E+00 1.02E+00 1.43E-01 9.87E-01 9.87E-02 1.02E+00 1.01E-01 1.03E+00 7.10E-02  
8.73E+00 1.03E+00 1.41E-01 9.88E-01 9.93E-02 1.01E+00 1.00E-01 1.03E+00 7.13E-02  
8.76E+00 1.04E+00 1.43E-01 9.91E-01 9.88E-02 1.00E+00 9.93E-02 1.03E+00 7.09E-02  
8.79E+00 1.04E+00 1.42E-01 9.95E-01 9.73E-02 9.98E-01 9.85E-02 1.02E+00 7.07E-02  
8.82E+00 1.05E+00 1.42E-01 9.98E-01 9.81E-02 9.92E-01 9.80E-02 1.02E+00 7.11E-02  
8.85E+00 1.05E+00 1.43E-01 9.99E-01 9.68E-02 9.85E-01 9.73E-02 1.02E+00 7.00E-02  
8.88E+00 1.06E+00 1.42E-01 1.00E+00 9.82E-02 9.79E-01 9.58E-02 1.02E+00 6.97E-02  
8.91E+00 1.06E+00 1.43E-01 1.00E+00 9.78E-02 9.73E-01 9.68E-02 1.02E+00 6.90E-02  
8.94E+00 1.07E+00 1.42E-01 1.00E+00 9.71E-02 9.68E-01 9.62E-02 1.01E+00 6.91E-02  
8.97E+00 1.06E+00 1.44E-01 1.01E+00 9.80E-02 9.64E-01 9.56E-02 1.01E+00 6.78E-02  
9.00E+00 1.07E+00 1.42E-01 1.01E+00 9.61E-02 9.61E-01 9.44E-02 1.01E+00 6.88E-02  
9.03E+00 1.07E+00 1.42E-01 1.01E+00 9.73E-02 9.57E-01 9.35E-02 1.01E+00 6.81E-02  
9.06E+00 1.07E+00 1.43E-01 1.02E+00 9.66E-02 9.53E-01 9.45E-02 1.00E+00 6.80E-02  
9.09E+00 1.08E+00 1.41E-01 1.02E+00 9.57E-02 9.49E-01 9.28E-02 1.00E+00 6.76E-02  
9.12E+00 1.07E+00 1.40E-01 1.02E+00 9.70E-02 9.46E-01 9.24E-02 9.98E-01 6.68E-02  
9.15E+00 1.07E+00 1.39E-01 1.02E+00 9.46E-02 9.46E-01 9.24E-02 9.95E-01 6.71E-02  
9.18E+00 1.07E+00 1.39E-01 1.02E+00 9.55E-02 9.42E-01 9.13E-02 9.92E-01 6.63E-02  
9.21E+00 1.07E+00 1.37E-01 1.02E+00 9.42E-02 9.40E-01 9.17E-02 9.91E-01 6.59E-02  
9.24E+00 1.07E+00 1.37E-01 1.02E+00 9.59E-02 9.38E-01 9.16E-02 9.88E-01 6.58E-02  
9.27E+00 1.07E+00 1.36E-01 1.02E+00 9.48E-02 9.39E-01 9.08E-02 9.87E-01 6.53E-02  
9.30E+00 1.06E+00 1.37E-01 1.03E+00 9.43E-02 9.38E-01 9.07E-02 9.84E-01 6.51E-02  
9.33E+00 1.06E+00 1.36E-01 1.03E+00 9.39E-02 9.38E-01 8.96E-02 9.83E-01 6.53E-02  
9.36E+00 1.06E+00 1.34E-01 1.03E+00 9.35E-02 9.36E-01 9.07E-02 9.82E-01 6.56E-02  
9.39E+00 1.06E+00 1.35E-01 1.03E+00 9.38E-02 9.38E-01 8.91E-02 9.81E-01 6.43E-02  
9.42E+00 1.05E+00 1.33E-01 1.03E+00 9.34E-02 9.38E-01 8.96E-02 9.80E-01 6.51E-02  
9.45E+00 1.05E+00 1.33E-01 1.03E+00 9.41E-02 9.41E-01 8.88E-02 9.77E-01 6.45E-02  
9.48E+00 1.04E+00 1.31E-01 1.03E+00 9.31E-02 9.40E-01 8.74E-02 9.77E-01 6.45E-02  
9.51E+00 1.04E+00 1.32E-01 1.03E+00 9.27E-02 9.41E-01 8.93E-02 9.75E-01 6.35E-02  
9.54E+00 1.03E+00 1.31E-01 1.03E+00 9.20E-02 9.43E-01 8.87E-02 9.75E-01 6.32E-02  
9.57E+00 1.03E+00 1.31E-01 1.03E+00 9.26E-02 9.45E-01 9.00E-02 9.74E-01 6.34E-02  
9.60E+00 1.03E+00 1.29E-01 1.03E+00 9.17E-02 9.47E-01 8.77E-02 9.74E-01 6.38E-02  
9.63E+00 1.02E+00 1.29E-01 1.02E+00 9.08E-02 9.49E-01 8.71E-02 9.74E-01 6.30E-02  
9.66E+00 1.02E+00 1.28E-01 1.02E+00 9.08E-02 9.53E-01 8.80E-02 9.72E-01 6.18E-02  
9.69E+00 1.02E+00 1.27E-01 1.02E+00 9.05E-02 9.56E-01 8.78E-02 9.75E-01 6.30E-02  
9.72E+00 1.01E+00 1.28E-01 1.02E+00 9.11E-02 9.58E-01 8.67E-02 9.74E-01 6.24E-02  
9.75E+00 1.01E+00 1.25E-01 1.02E+00 8.96E-02 9.62E-01 8.78E-02 9.73E-01 6.28E-02  
9.78E+00 1.00E+00 1.24E-01 1.02E+00 8.97E-02 9.66E-01 8.64E-02 9.75E-01 6.23E-02  
9.81E+00 1.00E+00 1.25E-01 1.02E+00 9.06E-02 9.69E-01 8.72E-02 9.75E-01 6.09E-02  
9.84E+00 9.94E-01 1.24E-01 1.01E+00 8.83E-02 9.73E-01 8.69E-02 9.75E-01 6.13E-02

---

9.87E+00 9.92E-01 1.24E-01 1.01E+00 8.91E-02 9.77E-01 8.65E-02 9.77E-01 6.12E-02  
9.90E+00 9.90E-01 1.25E-01 1.01E+00 8.85E-02 9.83E-01 8.71E-02 9.78E-01 6.15E-02  
9.93E+00 9.85E-01 1.23E-01 1.01E+00 8.69E-02 9.85E-01 8.69E-02 9.79E-01 6.06E-02  
9.96E+00 9.82E-01 1.22E-01 1.01E+00 8.72E-02 9.89E-01 8.70E-02 9.80E-01 6.11E-02  
9.99E+00 9.78E-01 1.22E-01 1.01E+00 8.73E-02 9.95E-01 8.67E-02 9.82E-01 6.00E-02  
1.00E+01 9.7E-01 1.21E-01 1.01E+00 8.74E-02 9.99E-01 8.65E-02 9.84E-01 6.08E-02
